# Supplementary material
Source: Royal Society of Chemistry journal article supplement (doi:10.1039/d6cc02223e)
Supplement: d6cc02223e1.pdf [file d6cc02223e1.pdf]

Supporting information

**One-Pot Enantioselective Cyclopropanation  
Process from Inactivated Aldehydes Mediated by  
Organocatalysis**

Camille Rocq and Sylvain Canesi\*

*Laboratoire de Méthodologie et Synthèse de Produit Naturels Université du Québec à Montréal,  
C.P.8888, Succ. Centre-Ville, Montréal. H3C 3P8, Québec, Canada.*

\*E-mail: [canesi.sylvain@uqam.ca](mailto:canesi.sylvain@uqam.ca)

## Table of contents

I. General Information

II. Experimental procedures and characterization

III. References

IV. NMR Spectra

V. SFC Data

## I. General Information

**Reaction methods:** unless otherwise stated, non-aqueous reactions were performed in dried glassware under positive argon pressure. Reaction vessels were equipped with a magnetic stirrer bar. Air- and moisture-sensitive liquids were transferred via syringe or cannula through rubber septa using standard techniques. Solids were either added under an inert gas flow or dissolved in an appropriate solvent before being treated as liquids. Solvents used in reactions were dried using an LC Technical SP-1 solvent purification system. Solvents used for extraction and purification by flash column chromatography were used as received. Flash column chromatography was performed using the indicated solvent system (v/v%) and CLS ZEOprep HYD 40–63  $\mu\text{m}$  silica gel. Reactions performed at ambient temperature were conducted without heating or cooling, at an ambient temperature typically of 23 °C, depending on weather conditions (ca. 18–28 °C). Reagents were purchased from commercial sources and used as received, unless otherwise noted. Concentration under reduced pressure (in vacuo) was performed by rotary evaporation (bath temperature 40–60 °C). Reactions were monitored by thin-layer chromatography.

**Characterization:** TLC plates were visualised using UV fluorescence quenching (with a source of either 254 or 360 nm) followed by staining with either Hannessian's stain or  $\text{KMnO}_4$  stain and heating. Optical rotation was measured using a Jasco P-1010 automatic polarimeter with the Na-D line (589 nm), with the concentration (c) of the solution expressed in g/100 mL at room temperature.  $^1\text{H}$  NMR (300 MHz),  $^{13}\text{C}$  NMR (75 MHz) and  $^{19}\text{F}$  NMR (282 MHz) nuclear magnetic resonance spectra were determined on a Bruker Ultrashield spectrometer at room temperature. Chemical shifts for  $^1\text{H}$  NMR are reported in parts per million (ppm) downfield from tetramethylsilane ( $\delta$ ) as the internal standard, with coupling constants expressed in hertz (Hz). The following abbreviations are used to indicate spin multiplicity: s = singlet, d = doublet, t = triplet, q = quartet and m = multiplet. Chemical shifts for  $^{13}\text{C}$  NMR are reported in ppm relative to the centre of a triplet at 77.16 ppm for deuteriochloroform. Some spectra include minor impurities of water, solvent and grease, which do not affect the assignments. Accurate mass measurements were performed on a LC-TOF 6224 instrument from Agilent technologies with electrospray ionization. Aliquots of 0.1  $\mu\text{L}$  were injected into the mass spectrometer using a 0.5 mL/min flow of 50% methanol/ 50% water mixture. The capillary voltage was set at 3000 V and mass spectra were acquired from 100 to 3000 m/z. Protonated molecular ions  $[\text{M}+\text{H}]^+$  were used for accurate mass calculation in positive mode. Enantiomeric excess values were determined by SFC using a WHELK-O1 column, eluting with  $\text{CO}_2$  and EtOH (flow rate = 3 mL/min,  $\lambda$  = 210 nm).

## II. Experimental procedures and characterization

### General procedure for organocatalytic enantioselective cyclopropanation

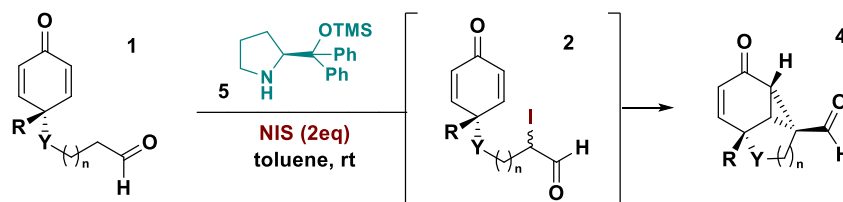

To a solution of aldehyde **1** (1 equiv.) in dry toluene (0.05 M) under argon, were added subsequently N-iodosuccinimide (2equiv.) and organocatalyst **(S)-5** (20 mol%) at room temperature. The resulting mixture was stirred between 8 hours and 5 days (monitored by NMR analysis). Once complete, an aqueous saturated ammonium chloride was added, followed by EtOAc. The organic layers were separated, and the aqueous layer was extracted with EtOAc. The combined organic layers were washed with saturated aqueous NaCl, dried over Na<sub>2</sub>SO<sub>4</sub>, filtered, and concentrated under reduced pressure. The residue was then purified by silica gel chromatography to obtain product **4**.

### Structures of dienone precursors (1a – 1n)

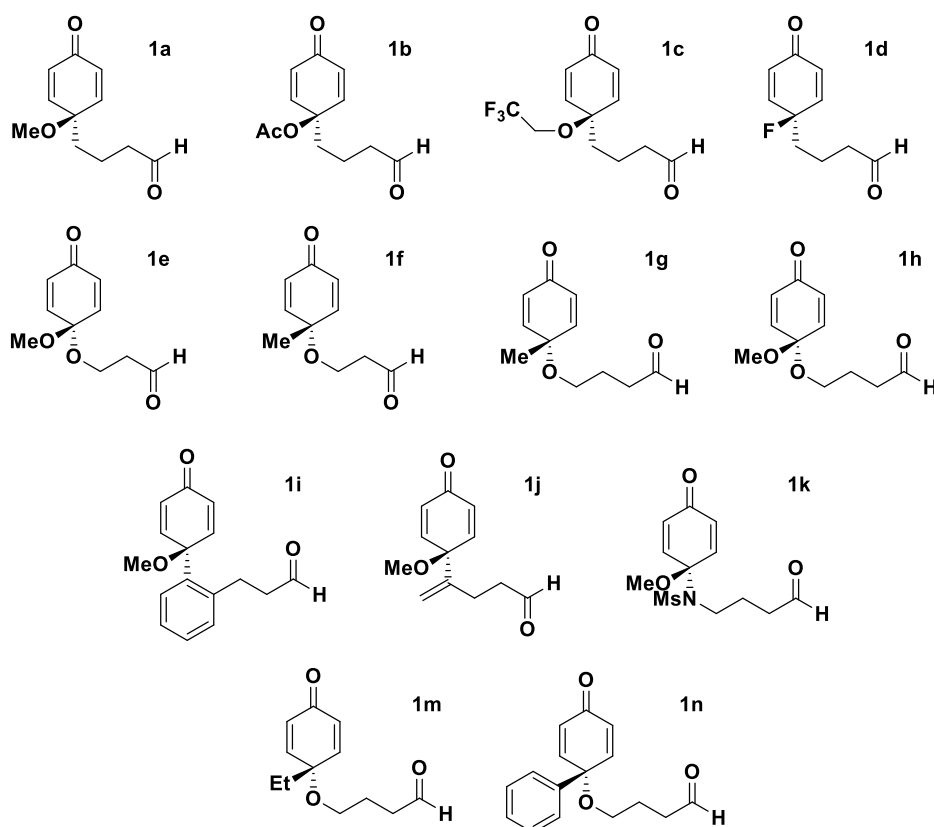

All dienone precursors are prepared according to procedures described by Gaunt<sup>1</sup> and Rovis<sup>2</sup>.

(2a*S*,2a<sup>1</sup>*S*,2b*S*,5a*S*)-5a-methoxy-3-oxo-1,2,2a<sup>1</sup>,2b,3,5a-hexahydro-2aH-cyclopropa[cd]indene-2a-carbaldehyde (+)-**4a**:

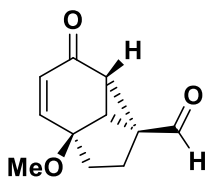

Starting from dienone **1a** (20 mg, 0.103 mmol), the reaction was stirred overnight. Purification by silica gel flash chromatography (*n*-Hex/EtOAc, 90:10 to 70:30) afforded cyclopropane **4a** as a colorless oil (15 mg, 76% yield).

<sup>1</sup>H NMR (300 MHz, CDCl<sub>3</sub>) δ 9.00 (s, 1H), 6.78 (dd, *J* = 10.4, 1.4 Hz, 1H), 6.21 (dd, *J* = 10.4, 1.2 Hz, 1H), 3.44 (s, 3H), 2.88 (dd, *J* = 8.3, 1.4 Hz, 1H), 2.72 (m, 2H), 2.55 (m, 1H), 1.99 – 1.90 (dd, *J* = 12.3, 5.5 Hz, 1H), 1.35 (ddd, *J* = 14.3, 12.3, 5.8 Hz, 1H).

<sup>13</sup>C NMR (75 MHz, CDCl<sub>3</sub>) δ 196.2, 191.1, 151.3, 130.6, 82.3, 54.9, 49.6, 49.0, 40.6, 36.9, 18.7.

SFC: WHELK-O1 column (CO<sub>2</sub>/EtOH, 95:5), flow rate 3 ml/min, λ = 210 nm; t<sub>R</sub> (major) = 6.5 min, t<sub>R</sub> (minor) = 8.2 min, 99% ee.

[α]<sub>D</sub><sup>21</sup> = +54.8 (*c* 0.13, CH<sub>2</sub>Cl<sub>2</sub>).

HRMS (ESI): *m/z* Calc. for C<sub>11</sub>H<sub>12</sub>O<sub>3</sub> (M+H)<sup>+</sup>: 193.0859; found: 193.0861.

(2a*S*,2a<sup>1</sup>*S*,2b*S*,5a*S*)-2a-formyl-3-oxo-1,2,2a<sup>1</sup>,2b,3-hexahydro-5aH-cyclopropa[cd]inden-5a-yl acetate (+)-**4b**:

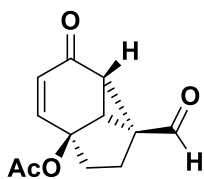

Starting from dienone **1b** (28 mg, 0.126 mmol), the reaction was stirred for 8 hours. Purification by silica gel flash chromatography (*n*-Hex/EtOAc, 90:10 to 70:30) afforded cyclopropane **4b** as a colorless oil (19 mg, 69% yield).

<sup>1</sup>H NMR (300 MHz, CDCl<sub>3</sub>) δ 8.95 (s, 1H), 6.71 (dd, *J* = 10.4, 1.3 Hz, 1H), 6.08 (dd, *J* = 10.4, 1.1 Hz, 1H), 2.96 (dd, *J* = 8.7, 1.3 Hz, 1H), 2.86 – 2.58 (m, 3H), 2.14 (s, 3H), 2.10 (m, 1H), 1.34 (ddd, *J* = 14.4, 12.5, 5.4 Hz, 1H).

<sup>13</sup>C NMR (75 MHz, CDCl<sub>3</sub>) δ 195.8, 190.5, 170.3, 149.5, 127.3, 80.6, 49.7, 48.4, 42.6, 35.9, 21.2, 17.9.

SFC: WHELK-O1 column (CO<sub>2</sub>/EtOH, 95:5), flow rate 3 ml/min, λ = 210 nm; t<sub>R</sub> (major) = 7.1 min, t<sub>R</sub> (minor) = 9.1 min, >99% ee.

[α]<sub>D</sub><sup>21</sup> = +100.9 (*c* 1.0, CH<sub>2</sub>Cl<sub>2</sub>).

HRMS (ESI): *m/z* Calc. for C<sub>12</sub>H<sub>12</sub>O<sub>4</sub> (M+H)<sup>+</sup>: 243.0628; found: 243.0621.

(2a*S*,2a<sup>1</sup>*S*,2b*S*,5a*S*)-3-oxo-5a-(2,2,2-trifluoroethoxy)-1,2,2a<sup>1</sup>,2b,3,5a-hexahydro-2aH-cyclopropa[cd]indene-2a-carbaldehyde (**+**)-**4c**:

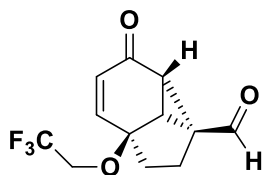

Starting from dienone **1c** (20 mg, 0.076 mmol), the reaction was stirred for 10 hours. Purification by silica gel flash chromatography (*n*-Hex/EtOAc, 90:10 to 80:20) afforded cyclopropane **4c** as a colorless oil (15 mg, 76% yield).

<sup>1</sup>H NMR (300 MHz, CDCl<sub>3</sub>) δ 9.03 (s, 1H), 6.74 (dd, *J* = 10.4, 1.4 Hz, 1H), 6.24 (dd, *J* = 10.4, 1.2 Hz, 1H), 3.95 (q, *J* = 8.3 Hz, 2H), 2.85 (dd, *J* = 8.3, 1.4 Hz, 1H), 2.81 – 2.58 (m, 3H), 2.03 (ddd, *J* = 12.2, 6.1, 1.3 Hz, 1H), 1.46 – 1.29 (m, 1H).

<sup>13</sup>C NMR (75 MHz, CDCl<sub>3</sub>) 195.8, 190.1, 148.7, 131.3, 123.4 (q, *J* = 277.6 Hz), 83.0, 65.3 (q, *J* = 35.1 Hz), 49.5, 49.0, 40.6, 36.6, 18.8.

<sup>19</sup>F NMR (282 MHz, CDCl<sub>3</sub>) δ -74.28 (t, *J* = 8.4 Hz).

SFC: WHELK-O1 column (CO<sub>2</sub>/MeOH, 95:5), flow rate 3 ml/min, λ = 210 nm; t<sub>R</sub> (major) = 4.0 min, t<sub>R</sub> (minor) = 5.1 min, 93% ee.

[α]<sub>D</sub><sup>21</sup> = +22.5 (c 1.0, CH<sub>2</sub>Cl<sub>2</sub>).

HRMS (ESI): *m/z* Calc. for C<sub>12</sub>H<sub>11</sub>F<sub>3</sub>O<sub>3</sub> (M+H)<sup>+</sup>: 261.0733; found: 261.0740.

(2a*R*,2a<sup>1</sup>*S*,2b*S*,5a*S*)-5a-fluoro-3-oxo-1,2,2a<sup>1</sup>,2b,3,5a-hexahydro-2aH-cyclopropa[cd]indene-2a-carbaldehyde (**-**)-**4d**:

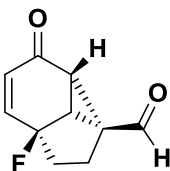

Starting from dienone **1d** (20 mg, 0.110 mmol), the reaction was stirred for 2 days. Purification by silica gel flash chromatography (*n*-Hex/EtOAc, 90:10 to 80:20) afforded cyclopropane **4d** as a colorless oil (13 mg, 66% yield).

<sup>1</sup>H NMR (300 MHz, CDCl<sub>3</sub>) δ 9.00 (s, 1H), 6.89 (td, *J* = 10.3, 1.4 Hz, 1H), 6.11 (dd, *J* = 10.3, 1.1 Hz, 1H), 3.10 (ddd, *J* = 13.2, 8.6, 1.4 Hz, 1H), 2.89 – 2.61 (m, 3H), 2.17 (dd, *J* = 11.8, 6.0 Hz, 1H), 1.38 – 1.19 (m, 1H).

<sup>13</sup>C NMR (75 MHz, CDCl<sub>3</sub>) δ 195.3, 190.3, 146.9 (d, *J* = 31.9 Hz), 128.8, 95.3 (d, *J* = 189.5 Hz), 49.4, 48.4 (d, *J* = 24.2 Hz), 41.7 (d, *J* = 34.6 Hz), 35.2 (d, *J* = 3.0 Hz), 18.2 (d, *J* = 8.7 Hz).

<sup>19</sup>F NMR (282 MHz, CDCl<sub>3</sub>) δ -139.24 – 158.98 (m)

SFC: WHELK-O1 column (CO<sub>2</sub>/EtOH, 95:5), flow rate 3 ml/min, λ = 210 nm; t<sub>R</sub> (major) = 3.5 min, t<sub>R</sub> (minor) = 4.1 min, 90% ee.

[α]<sub>D</sub><sup>21</sup> = -16.5 (c 0.17, CH<sub>2</sub>Cl<sub>2</sub>).

HRMS (ESI): *m/z* Calc. for C<sub>10</sub>H<sub>9</sub>FO<sub>2</sub> (M+H)<sup>+</sup>: 181.0659; found: 181.0660.

(2aR,2a<sup>1</sup>S,2bS,5aR)-5a-methoxy-3-oxo-2a<sup>1</sup>,2b,3,5a-tetrahydrocyclopropa[cd]benzofuran-2a(2H)-carbaldehyde (-)-**4e**:

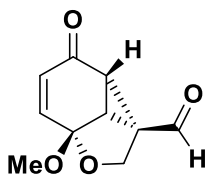

Starting from dienone **1e** (20 mg, 0.102 mmol), the reaction was stirred for 4 days. Purification by silica gel flash chromatography (*n*-Hex/EtOAc, 90:10 to 75:25) afforded cyclopropane **4e** as a colorless oil (11 mg, 56% yield).

<sup>1</sup>H NMR (300 MHz, CDCl<sub>3</sub>) δ 9.13 (s, 1H), 6.60 (dd, *J* = 10.3, 1.1 Hz, 1H), 6.14 (dd, *J* = 10.3, 1.3 Hz, 1H), 4.83 (dd, *J* = 10.7, 0.7 Hz, 1H), 3.55 (s, 3H), 3.47 (d, *J* = 10.7 Hz, 1H), 3.22 (dd, *J* = 8.2, 1.1 Hz, 1H), 2.90 (ddd, *J* = 8.2, 1.3, 0.7 Hz, 1H).

<sup>13</sup>C NMR (75 MHz, CDCl<sub>3</sub>) δ 193.4, 190.3, 143.6, 129.0, 102.7, 61.6, 53.3, 50.4, 38.3, 36.3.

SFC: WHELK-O1 column (CO<sub>2</sub>/EtOH, 95:5), flow rate 3 ml/min, λ = 210 nm; t<sub>R</sub> (major) = 2.7 min, t<sub>R</sub> (minor) = 3.1 min, >99% ee.

[α]<sub>D</sub><sup>21</sup> = -14.9 (c 0.4, CH<sub>2</sub>Cl<sub>2</sub>).

HRMS (ESI): *m/z* Calc. for C<sub>16</sub>H<sub>14</sub>O<sub>3</sub> (M+H)<sup>+</sup>: 255.1016; found: 255.1021.

(2aS,2a<sup>1</sup>S,2bS,5aR)-5a-methyl-3-oxo-2a<sup>1</sup>,2b,3,5a-tetrahydrocyclopropa[cd]benzofuran-2a(2H)-carbaldehyde (-)-**4f**:

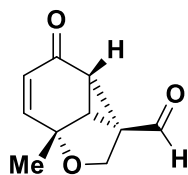

Starting from dienone **1f** (20 mg, 0.111 mmol), the reaction was stirred for 3 days. Purification by silica gel flash chromatography (*n*-Hex/EtOAc, 90:10 to 80:20) afforded cyclopropane **4f** as a colorless oil (13 mg, 66% yield).

<sup>1</sup>H NMR (300 MHz, CDCl<sub>3</sub>) δ 9.12 (s, 1H), 6.35 (dd, *J* = 10.2, 0.9 Hz, 1H), 6.16 (dd, *J* = 10.1, 1.2 Hz, 1H), 4.70 (d, *J* = 10.9 Hz, 1H), 3.52 (d, *J* = 10.9 Hz, 1H), 2.93 (dd, *J* = 7.7, 0.9 Hz, 1H), 2.86 (dd, *J* = 7.7, 1.2 Hz, 1H), 1.65 (s, 3H).

<sup>13</sup>C NMR (75 MHz, CDCl<sub>3</sub>) δ 194.1, 190.7, 145.3, 128.9, 76.9, 62.8, 55.6, 43.3, 38.9, 25.1.

SFC: WHELK-O1 column (CO<sub>2</sub>/EtOH, 95:5), flow rate 3 ml/min, λ = 210 nm; t<sub>R</sub> (major) = 2.9 min, t<sub>R</sub> (minor) = 3.2 min, 99% ee.

[α]<sub>D</sub><sup>21</sup> = -46.9 (c 0.9, CH<sub>2</sub>Cl<sub>2</sub>).

HRMS (ESI): *m/z* Calc. for C<sub>10</sub>H<sub>10</sub>O<sub>3</sub> (M+H)<sup>+</sup>: 179.0703; found: 179.0693.

(3aS,3a<sup>1</sup>S,3bS,6aR)-6a-methyl-4-oxo-2,3,3a<sup>1</sup>,3b,4,6a-hexahydro-3aH-cyclopropa[de]chromene-3a-carbaldehyde (+)-**4g**:

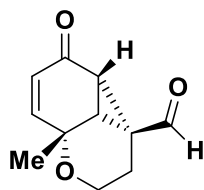

Starting from dienone **1g** (15 mg, 0.077 mmol), the reaction was stirred for 5 days. Purification by silica gel flash chromatography (*n*-Hex/EtOAc, 90:10 to 80:20) afforded cyclopropane **4g** as a colorless oil (7 mg, 47% yield).

<sup>1</sup>H NMR (300 MHz, CDCl<sub>3</sub>) δ 8.79 (s, 1H), 6.41 (dd, *J* = 10.2, 1.3 Hz, 1H), 6.05 (dd, *J* = 10.2, 1.3 Hz, 1H), 3.70 (m, 1H), 3.54 (m, 1H), 2.70 (m, 1H), 2.39 (dd, *J* = 8.2, 1.3 Hz, 1H), 2.09 (dd, *J* = 8.2, 1.3 Hz, 1H), 1.57 (s, 3H), 1.64 – 1.49 (m, 1H).

<sup>13</sup>C NMR (75 MHz, CDCl<sub>3</sub>) δ 197.3, 191.6, 151.6, 129.7, 65.4, 58.8, 35.5, 30.2, 29.4, 27.4, 14.5.

SFC: WHELK-O1 column (CO<sub>2</sub>/MeOH, 95:5), flow rate 3 ml/min, λ = 210 nm; t<sub>R</sub> (minor) = 4.6 min, t<sub>R</sub> (major) = 5.7 min, 97% ee.

[α]<sub>D</sub><sup>21</sup> = +20.3 (c 0.4, CH<sub>2</sub>Cl<sub>2</sub>).

HRMS (ESI): *m/z* Calc. for C<sub>11</sub>H<sub>12</sub>O<sub>3</sub> (M+H)<sup>+</sup>: 193.0859; found: 193.0859.

(3aR,3a<sup>1</sup>S,3bS,6aR)-6a-methoxy-4-oxo-2,3,3a<sup>1</sup>,3b,4,6a-hexahydro-3aH-cyclopropa[de]chromene-3a-carbaldehyde (-)-**4h**:

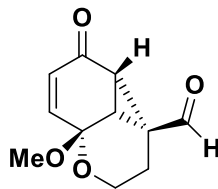

Starting from dienone **1h** (20 mg, 0.095 mmol), the reaction was stirred overnight. Purification by silica gel flash chromatography (*n*-Hex/EtOAc, 90:10 to 75:25) afforded cyclopropane **4h** as a colorless oil (8 mg, 41% yield).

<sup>1</sup>H NMR (300 MHz, CDCl<sub>3</sub>) δ 8.85 (s, 1H), 6.59 (dd, *J* = 10.3, 1.5 Hz, 1H), 6.14 (dd, *J* = 10.3, 1.2 Hz, 1H), 3.90 – 3.65 (m, 2H), 3.49 (s, 3H), 2.70 (m, 1H), 2.47 (dd, *J* = 8.6, 1.2 Hz, 1H), 2.38 (dd, *J* = 8.6, 1.5 Hz, 1H), 1.62 – 1.47 (m, 1H).

<sup>13</sup>C NMR (75 MHz, CDCl<sub>3</sub>) δ 196.5, 190.9, 146.4, 129.8, 91.6, 61.5, 49.6, 37.2, 28.9, 24.8, 16.0.

SFC: WHELK-O1 column (CO<sub>2</sub>/EtOH, 95:5), flow rate 3 ml/min, λ = 210 nm; t<sub>R</sub> (major) = 3.5 min, t<sub>R</sub> (minor) = 5.0 min, >99% ee.

[α]<sub>D</sub><sup>21</sup> = -12.4 (c 0.15, CH<sub>2</sub>Cl<sub>2</sub>).

HRMS (ESI): *m/z* Calc. for C<sub>11</sub>H<sub>12</sub>O<sub>4</sub> (M+H)<sup>+</sup>: 209.0808; found: 209.0815.

(3a*S*,3a<sup>1</sup>*S*,3b*S*,8b*S*)-8b-methoxy-3-oxo-3a,3a<sup>1</sup>,4,8b-tetrahydrocyclopropa[*jk*]phenanthrene-3b(3H)-carbaldehyde (-)-**4i**:

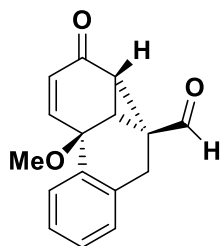

Starting from dienone **2i** (50 mg, 0.195 mmol), the reaction was stirred for 3 days. Purification by silica gel flash chromatography (*n*-Hex/EtOAc, 90:10) afforded cyclopropane **4i** as a colorless oil (20 mg, 41% yield).

<sup>1</sup>H NMR (300 MHz, CDCl<sub>3</sub>) δ 8.86 (s, 1H), 7.76 (d, *J* = 7.6 Hz, 1H), 7.42 – 7.17 (m, 3H), 6.28 – 6.03 (m, 2H), 3.85 (d, *J* = 16.9 Hz, 1H), 3.59 (d, *J* = 0.7 Hz, 3H), 2.72 (d, *J* = 8.0, 0.9 Hz, 1H), 2.45 (dd, *J* = 8.0, 1.9 Hz, 1H), 2.13 (d, *J* = 16.8 Hz, 1H).

<sup>13</sup>C NMR (75 MHz, CDCl<sub>3</sub>) δ 196.5, 190.9, 147.2, 137.3, 136.5, 129.1, 128.6, 128.1, 128.0, 124.4, 72.3, 52.4, 40.2, 32.7, 32.2, 22.8.

SFC: WHELK-O1 column (CO<sub>2</sub>/EtOH, 95:5), flow rate 3 ml/min, λ = 210 nm; t<sub>R</sub> (major) = 5.4 min, t<sub>R</sub> (minor) = 6.4 min, 95% ee.

[α]<sub>D</sub><sup>21</sup> = -229.7 (c 0.95, CH<sub>2</sub>Cl<sub>2</sub>).

HRMS (ESI): *m/z* Calc. for C<sub>16</sub>H<sub>14</sub>O<sub>3</sub> (M+H)<sup>+</sup>: 255.1016; found: 255.1020.

(2a*S*,2a<sup>1</sup>*S*,2b*S*,5a*S*)-5a-methoxy-1-methylene-3-oxo-1,2,2a<sup>1</sup>,2b,3,5a-hexahydro-2aH-cyclopropa[*cd*]indene-2a-carbaldehyde (-)-**4j**:

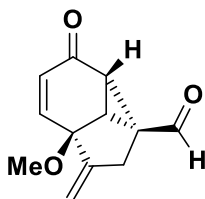

Starting from dienone **1j** (20 mg, 0.097 mmol), the reaction was stirred overnight. Purification by silica gel flash chromatography (*n*-Hex/EtOAc, 90:10 to 75:25) afforded cyclopropane **4j** as a colorless oil (10 mg, 51% yield).

<sup>1</sup>H NMR (300 MHz, CDCl<sub>3</sub>) δ 9.00 (s, 1H), 6.59 (dd, *J* = 10.2, 1.4 Hz, 1H), 6.06 (dd, *J* = 10.2, 1.1 Hz, 1H), 5.11 (dd, *J* = 2.9, 1.3 Hz, 1H), 4.99 (dd, *J* = 2.5, 1.3 Hz, 1H), 3.50 (s, 3H), 3.43 – 3.29 (m, 1H), 2.96 (dd, *J* = 8.4, 1.4 Hz, 1H), 2.78 (dt, *J* = 8.4, 0.8 Hz, 1H), 2.19 (dt, *J* = 17.7, 2.7 Hz, 1H).

<sup>13</sup>C NMR (75 MHz, CDCl<sub>3</sub>) δ 195.8, 190.6, 155.4, 151.00, 128.1, 108.7, 81.6, 53.7, 45.4, 38.9, 35.3, 25.8.

SFC: WHELK-O1 column (CO<sub>2</sub>/EtOH, 95:5), flow rate 3 ml/min, λ = 210 nm; t<sub>R</sub> (major) = 5.5 min, t<sub>R</sub> (minor) = 6.7 min, >99% ee.

[α]<sub>D</sub><sup>21</sup> = -228.7 (c 0.35, CH<sub>2</sub>Cl<sub>2</sub>).

HRMS (ESI): *m/z* Calc. for C<sub>12</sub>H<sub>12</sub>O<sub>3</sub> (M+H)<sup>+</sup>: 205.0859; found: 205.0851.

(3a*S*,3a<sup>1</sup>*S*,3b*S*,6a*S*)-6a-methoxy-1-(methylsulfonyl)-4-oxo-2,3,3a<sup>1</sup>,3b,4,6a-hexahydrocyclopropa[de]quinoline-3a(1H)-carbaldehyde (-)-**4k**:

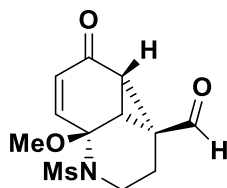

Starting from dienone **1k** (20 mg, 0.070 mmol), the reaction was stirred for 2 days. Purification by silica gel flash chromatography (*n*-Hex/EtOAc, 80:20 to 50:50) afforded cyclopropane **4k** as a colorless oil (11 mg, 55% yield).

<sup>1</sup>H NMR (300 MHz, CDCl<sub>3</sub>) δ 8.89 (s, 1H), 7.34 – 7.23 (m, 1H), 6.20 (dd, *J* = 10.5, 1.3 Hz, 1H), 3.87 (dt, *J* = 11.9, 4.2 Hz, 1H), 3.49 (s, 3H), 3.35 – 3.24 (m, 1H), 3.13 (s, 3H), 2.83 (dt, *J* = 15.2, 3.9 Hz, 1H), 2.61 (dd, *J* = 8.1, 1.3 Hz, 1H), 2.42 (dd, *J* = 8.1, 1.8 Hz, 1H), 1.67 – 1.50 (m, 1H).

<sup>13</sup>C NMR (75 MHz, CDCl<sub>3</sub>) δ 195.8, 189.5, 149.3, 130.5, 84.0, 51.9, 45.0, 44.4, 38.0, 30.7, 28.8, 16.8.

SFC: WHELK-O1 column (CO<sub>2</sub>/MeOH, 95:5), flow rate 3 ml/min, λ = 210 nm; t<sub>R</sub> (major) = 9.5 min, t<sub>R</sub> (minor) = 11.3 min, >99% ee.

[α]<sub>D</sub><sup>21</sup> = -58.2 (c 0.3, CH<sub>2</sub>Cl<sub>2</sub>).

HRMS (ESI): *m/z* Calc. for C<sub>12</sub>H<sub>15</sub>NO<sub>5</sub>S (M+H)<sup>+</sup>: 286.0744; found: 286.0745.

(3a*S*,3a<sup>1</sup>*S*,3b*S*,6a*R*)-6a-ethyl-4-oxo-2,3,3a<sup>1</sup>,3b,4,6a-hexahydro-3aH-cyclopropa[de]chromene-3a-carbaldehyde (+)-**4m**:

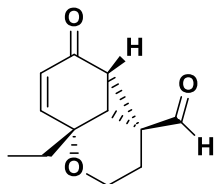

Starting from dienone **1m** (30 mg, 0.144 mmol), the reaction was stirred for overnight. An aqueous saturated ammonium chloride was then added, followed by EtOAc. The organic layers were separated, and the aqueous layer was extracted with EtOAc. The combined organic layers were washed with saturated aqueous NaCl, dried over Na<sub>2</sub>SO<sub>4</sub>, filtered, and concentrated under reduced pressure. The residue was then purified by silica gel flash chromatography (*n*-Hex/EtOAc, 90:10 to 70:30) to produce iodinated intermediate **2m** (19 mg, 0.057 mmol). It was dissolved in dry toluene (0.1 M) under argon and organocatalyst (**S**)-**5** (20 mol%) was added at room temperature. The resulting mixture was stirred for 3 days (monitored by NMR analysis). Once complete, an aqueous saturated ammonium chloride was added, followed by EtOAc. The organic layers were separated, and the aqueous layer was extracted with EtOAc. The combined organic layers were washed with saturated aqueous NaCl, dried over Na<sub>2</sub>SO<sub>4</sub>, filtered, and concentrated under reduced pressure. Purification by silica gel flash chromatography (*n*-Hex/EtOAc, 90:10) afforded cyclopropane **4m** as a colorless oil (6 mg, 51% yield).

<sup>1</sup>H NMR (300 MHz, CDCl<sub>3</sub>) δ 8.84 (s, 1H), 6.42 (dd, *J* = 10.3, 1.3 Hz, 1H), 6.14 (dd, *J* = 10.3, 1.3 Hz, 1H), 3.85 – 3.54 (m, 2H), 2.73 (ddd, *J* = 15.4, 8.1, 5.0 Hz, 1H), 2.43 (dd, *J* = 8.2, 1.3 Hz, 1H), 2.10 (dd, *J* = 8.2, 1.3 Hz, 1H), 1.86 (qd, *J* = 7.6, 2.2 Hz, 2H), 1.62 (m, 1H), 0.99 (t, *J* = 7.6 Hz, 3H).

<sup>13</sup>C NMR (75 MHz, CDCl<sub>3</sub>) δ 197.4, 191.9, 151.4, 131.0, 68.5, 59.0, 34.8, 31.1, 30.3, 26.1, 14.8, 7.3.

**SFC:** WHELK-O1 column (CO<sub>2</sub>/EtOH, 95:5), flow rate 3 ml/min,  $\lambda$  = 210 nm;  $t_R$  (major) = 5.0 min,  $t_R$  (minor) = 6.1 min, 95% ee.

**[ $\alpha$ ]<sub>D</sub><sup>21</sup>** = +58.0 (*c* 0.12, CH<sub>2</sub>Cl<sub>2</sub>).

**HRMS (ESI):** *m/z* Calc. for C<sub>12</sub>H<sub>14</sub>O<sub>3</sub> (M+H)<sup>+</sup>: 207.1016; found: 207.1017.

(3a*S*,3a<sup>1</sup>*S*,3b*S*,6a*R*)-4-oxo-6a-phenyl-2,3,3a<sup>1</sup>,3b,4,6a-hexahydro-3aH-cyclopropa[de]chromene-3a-carbaldehyde (**+**)-**4n**:

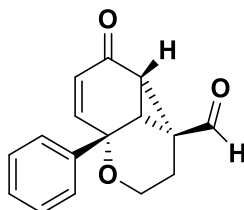

Starting from dienone **1n** (19 mg, 0.074 mmol), the reaction was stirred for 3 days. An aqueous saturated ammonium chloride was then added, followed by EtOAc. The organic layers were separated, and the aqueous layer was extracted with EtOAc. The combined organic layers were washed with saturated aqueous NaCl, dried over Na<sub>2</sub>SO<sub>4</sub>, filtered, and concentrated under reduced pressure. The residue was then purified by silica gel flash chromatography (*n*-Hex/EtOAc, 90:10 to 75:25) to produce iodinated intermediate **2n** (10 mg, 0.026 mmol). It was dissolved in dry toluene (0.1 M) under argon and organocatalyst (**S**)-**5** (20 mol%) was added at room temperature. The resulting mixture was stirred for 4 days (monitored by NMR analysis). Once complete, an aqueous saturated ammonium chloride was added, followed by EtOAc. The organic layers were separated, and the aqueous layer was extracted with EtOAc. The combined organic layers were washed with saturated aqueous NaCl, dried over Na<sub>2</sub>SO<sub>4</sub>, filtered, and concentrated under reduced pressure. Purification by silica gel flash chromatography (*n*-Hex/EtOAc, 90:10) afforded cyclopropane **4n** as a colorless oil (4 mg, 61% yield).

**<sup>1</sup>H NMR (300 MHz, CDCl<sub>3</sub>)**  $\delta$  8.78 (s, 1H), 7.59 – 7.29 (m, 5H), 6.53 (dd, *J* = 10.2, 1.4 Hz, 1H), 6.19 (dd, *J* = 10.2, 1.3 Hz, 1H), 4.04 – 3.80 (m, 2H), 2.88 (m, 1H), 2.59 (dd, *J* = 8.2, 1.3 Hz, 1H), 2.41 (dd, *J* = 8.2, 1.4 Hz, 1H), 1.74 (dt, *J* = 15.6, 7.9 Hz, 1H).

**<sup>13</sup>C NMR (75 MHz, CDCl<sub>3</sub>)**  $\delta$  196.8, 191.5, 151.2, 144.1, 129.0, 128.9, 128.4, 125.0, 69.2, 59.51, 35.6, 30.0, 28.9, 14.5.

**SFC:** WHELK-O1 column (CO<sub>2</sub>/EtOH, 95:5), flow rate 3 ml/min,  $\lambda$  = 210 nm;  $t_R$  (major) = 8.3 min,  $t_R$  (minor) = 11.1 min, 97% ee.

**[ $\alpha$ ]<sub>D</sub><sup>21</sup>** = +91.6 (*c* 0.1, CH<sub>2</sub>Cl<sub>2</sub>).

**HRMS (ESI):** *m/z* Calc. for C<sub>16</sub>H<sub>14</sub>O<sub>3</sub> (M+H)<sup>+</sup>: 255.1016; found: 255.1021.

## Bromo-dienone cyclopropanation procedure

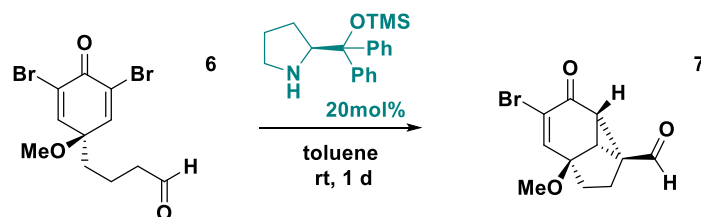

To a solution of bromo-dienone **6** (25 mg, 0.071 mmol) in dry toluene (0.05 M) under argon, organocatalyst (**S**)-**5** (20 mol%) was added at room temperature. The resulting mixture was stirred overnight (monitored by NMR analysis). Once complete, an aqueous saturated ammonium chloride was added, followed by EtOAc. The organic layers were separated, and the aqueous layer was extracted with EtOAc. The combined organic layers were washed with saturated aqueous NaCl, dried over Na<sub>2</sub>SO<sub>4</sub>, filtered, and concentrated under reduced pressure. Purification by silica gel flash chromatography (*n*-Hex/EtOAc, 90:10 to 80:20) afforded cyclopropane **7** as a colorless oil (14 mg, 74% yield).

<sup>1</sup>H NMR (300 MHz, CDCl<sub>3</sub>) δ 9.04 (s, 1H), 7.22 (d, *J* = 1.3 Hz, 1H), 3.48 (s, 3H), 2.96 (dd, *J* = 8.3, 1.3 Hz, 1H), 2.90 (dd, *J* = 8.3, 1.1 Hz, 1H), 2.76 (dd, *J* = 14.6, 8.7 Hz, 1H), 2.56 (td, *J* = 12.4, 8.8 Hz, 1H), 2.12 – 2.00 (m, 1H), 1.39 (ddd, *J* = 14.6, 12.4, 5.7 Hz, 1H).

<sup>13</sup>C NMR (75 MHz, CDCl<sub>3</sub>) δ 195.6, 184.0, 152.0, 123.9, 84.8, 77.6, 77.2, 76.8, 55.3, 49.9, 49.1, 41.4, 37.1, 19.1.

SFC: WHELK-O1 column (CO<sub>2</sub>/EtOH, 95:5), flow rate 3 ml/min, λ = 210 nm; t<sub>R</sub> (minor) = 6.3 min, t<sub>R</sub> (major) = 7.9 min, 5% ee.

[α]<sub>D</sub><sup>21</sup> = +11.22 (c 0.9, CH<sub>2</sub>Cl<sub>2</sub>).

HRMS (ESI): *m/z* Calc. for C<sub>11</sub>H<sub>11</sub>BrO<sub>3</sub> (M+H)<sup>+</sup>: 270.9964; found: 270.9964.

## General procedure for racemic cyclopropanation

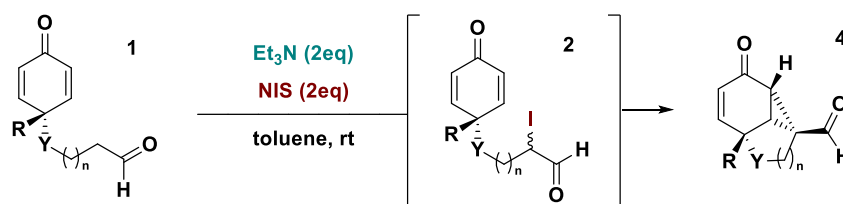

To a solution of aldehyde **1** (1 equiv.) in dry toluene (0.05 M) under argon, were added subsequently N-iodosuccinimide (2equiv.) and triethylamine (2equiv.) at room temperature. The resulting mixture was stirred overnight (monitored by NMR analysis). Once complete, an aqueous saturated ammonium chloride was added, followed by EtOAc. The organic layers were separated, and the aqueous layer was extracted with EtOAc. The combined organic layers were washed with saturated aqueous NaCl, dried over Na<sub>2</sub>SO<sub>4</sub>, filtered, and concentrated under reduced pressure. The residue was then purified by silica gel chromatography to obtain racemic product **4**.

## From cyclopropane **4a** to ketone **14**

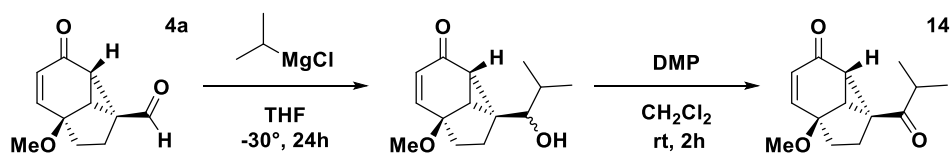

To a solution of cyclopropane **4a** (1 equiv.) in dry THF under argon, was added isopropylmagnesium chloride (2equiv.) at  $-30^{\circ}$ . After 24 hours, an aqueous saturated ammonium chloride was added, followed by EtOAc. The organic layers were separated, and the aqueous layer was extracted with EtOAc. The combined organic layers were washed with saturated aqueous NaCl, dried over  $\text{Na}_2\text{SO}_4$ , filtered, and concentrated under reduced pressure. The residue was then dissolved in dry  $\text{CH}_2\text{Cl}_2$  under argon. DMP was added and the mixture was stirred for 2h. The mixture was then filtrated under a short pad of silica and concentrated under reduced pressure. Purification by silica gel flash chromatography (*n*-Hex/EtOAc, 80:20) afforded ketone **14** as a colorless oil.

$^1\text{H}$  NMR (300 MHz,  $\text{CDCl}_3$ )  $\delta$  6.77 (dd,  $J = 10.4, 1.4$  Hz, 1H), 6.16 (dd,  $J = 10.3, 1.2$  Hz, 1H), 3.42 (s, 3H), 2.94 – 2.81 (m, 2H), 2.66 – 2.45 (m, 3H), 1.90 (m, 1H), 1.60 – 1.42 (m, 1H), 1.10 (d,  $J = 6.8$  Hz, 6H).

$^{13}\text{C}$  NMR (150 MHz,  $\text{CDCl}_3$ )  $\delta$  210.4, 192.3, 151.6, 130.9, 82.1, 77.6, 77.2, 76.7, 54.9, 49.1, 47.3, 42.1, 39.2, 36.5, 21.6, 19.0, 18.7.

HRMS (ESI):  $m/z$  Calc. for  $\text{C}_{14}\text{H}_{18}\text{O}_3$  ( $\text{M}+\text{H}$ ) $^+$ : 235.1329; found: 235.1319.

## Vinylcyclopropane rearrangement procedure

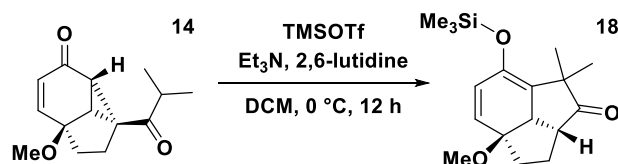

To a solution of ketone **14** (1 equiv.) in dry  $\text{CH}_2\text{Cl}_2$  (0.1 M) under argon, were added subsequently  $\text{Et}_3\text{N}$  (2 equiv.), lutidine (2 equiv.) and TMSOTf (2 equiv.) at  $0^{\circ}$ . After 24 hours, water was added, followed by EtOAc. The organic layers were separated, and the aqueous layer was extracted with EtOAc. The combined organic layers were washed with saturated aqueous NaCl, dried over  $\text{Na}_2\text{SO}_4$ , filtered, and concentrated under reduced pressure. The residue was then purified by silica gel chromatography (95:5 *n*-Hex/EtOAc) to afford product **18** (20% yield, 44% brsm).

$^1\text{H}$  NMR (300 MHz,  $\text{CDCl}_3$ )  $\delta$  5.91 (dd,  $J = 10.1, 1.2$  Hz, 1H), 5.71 (d,  $J = 10.2$  Hz, 1H), 3.64 (d,  $J = 8.5$  Hz, 1H), 3.26 (s, 3H), 3.04 (ddd,  $J = 11.7, 8.4, 2.7$  Hz, 1H), 2.34 – 2.02 (m, 1H), 1.95 – 1.84 (m, 1H), 1.79 (t,  $J = 4.9$  Hz, 1H), 1.32 (s, 3H), 1.13 (s, 3H), 1.10 – 0.83 (m, 1H), 0.21 (s, 9H).

$^{13}\text{C}$  NMR (150 MHz,  $\text{CDCl}_3$ )  $\delta$  223.9, 140.7, 131.4, 126.8, 122.3, 88.6, 51.4, 50.9, 50.1, 46.5, 35.1, 29.28, 24.0, 21.7, 1.0.

HRMS (ESI):  $m/z$  Calc. for  $\text{C}_{17}\text{H}_{26}\text{O}_3\text{Si}$  ( $\text{M}+\text{H}$ ) $^+$ : 307.1724; found: 307.1731.

### III. References

1. N. T. Vo, R. D. M. Pace, F. O'Hara and M. J. Gaunt, *J. Am. Chem. Soc.*, 2008, 130, 404.
2. Q. Liu and T. Rovis, *J. Am. Chem. Soc.*, 2006, 128, 2552.

### IV. NMR Spectra

300 MHz, CDCl<sub>3</sub>

— 9.00

6.80  
6.80  
6.77  
6.76

6.22  
6.22  
6.19  
6.19

3.44  
2.90  
2.90  
2.87  
2.87  
2.75  
2.74  
2.73  
2.72  
2.71  
2.70  
2.70  
2.68  
2.61  
2.58  
2.57  
2.54  
2.53  
2.52  
2.50  
1.97  
1.97  
1.96  
1.95  
1.93  
1.93  
1.91  
1.40  
1.38  
1.36  
1.35  
1.34  
1.34  
1.31  
1.29  
1.29

4a

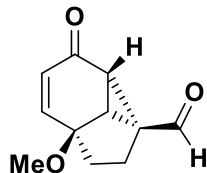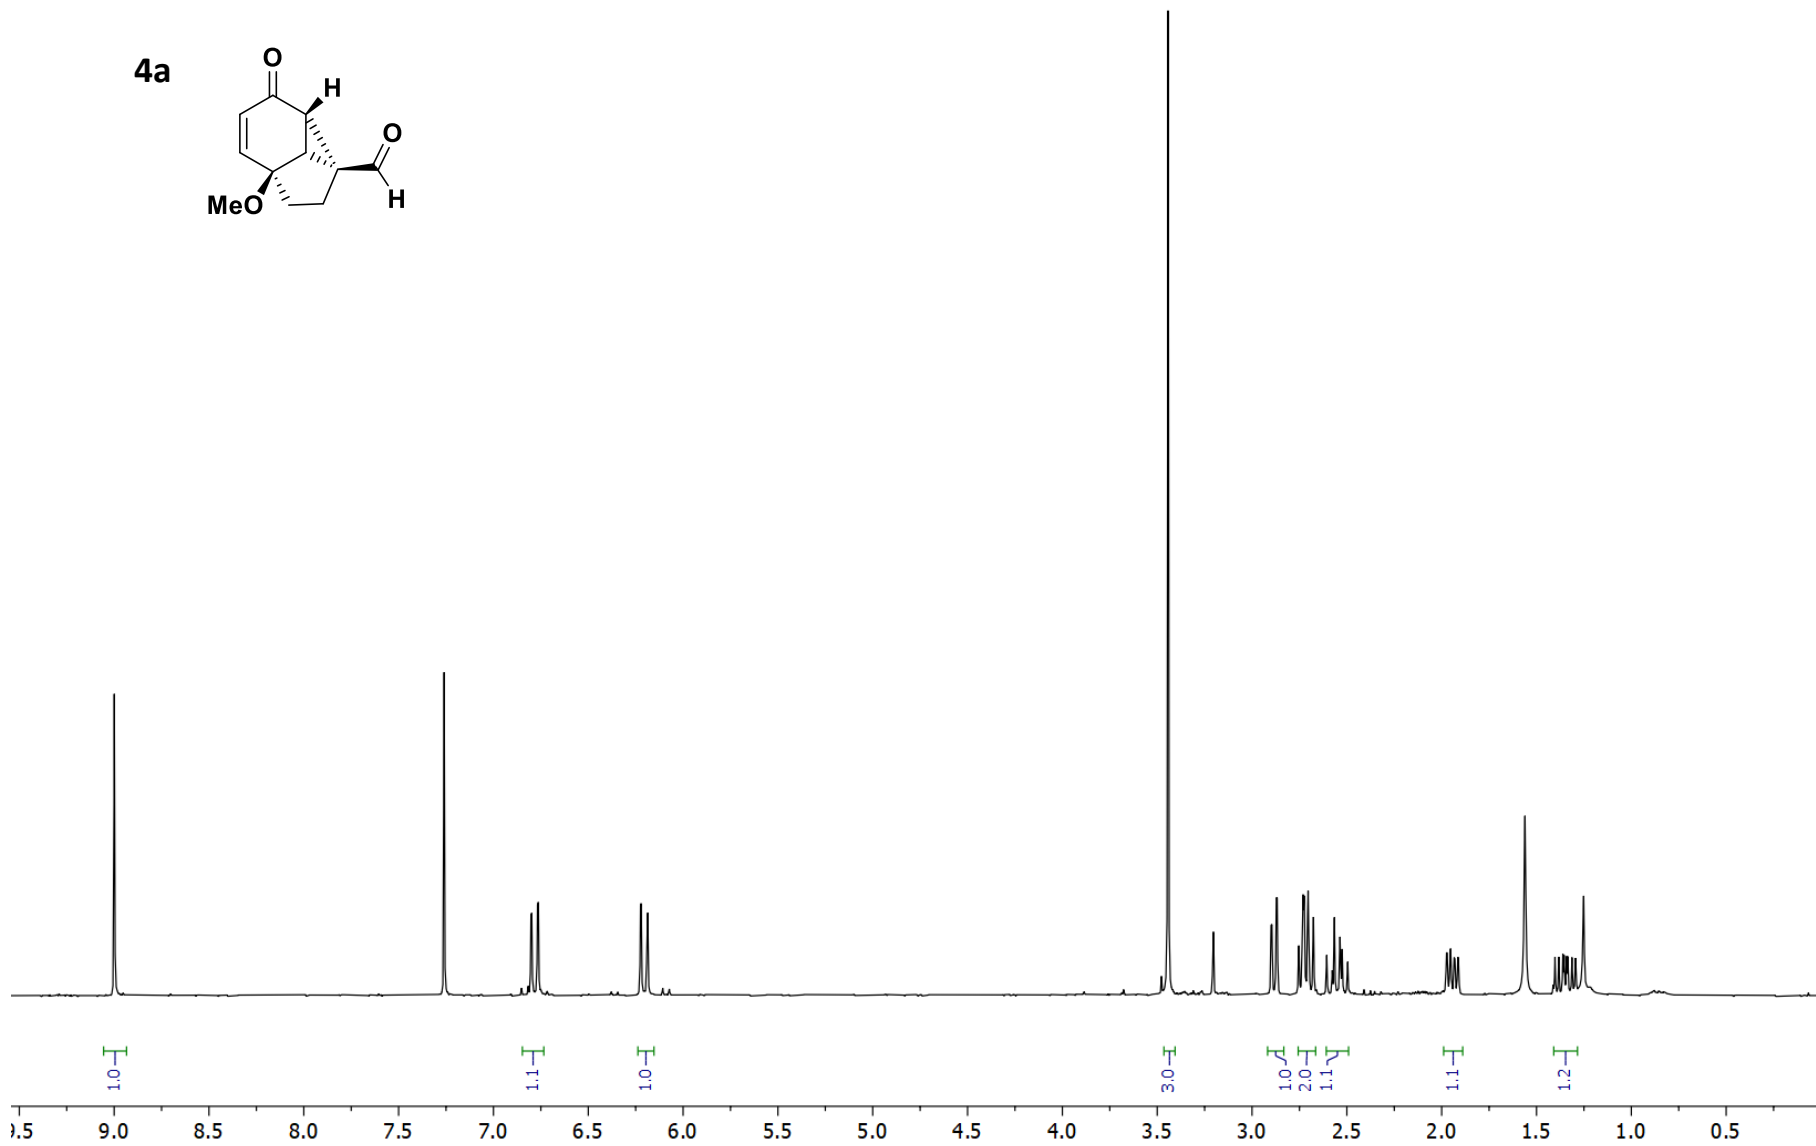

1.0

1.1

1.0

3.0

1.0

2.0

1.1

1.1

1.2

75 MHz, CDCl<sub>3</sub>

—196.22 —191.09 —151.33 —130.59 —82.28 —54.93 —49.57 —48.99 —40.63 —36.87 —18.67

**4a**

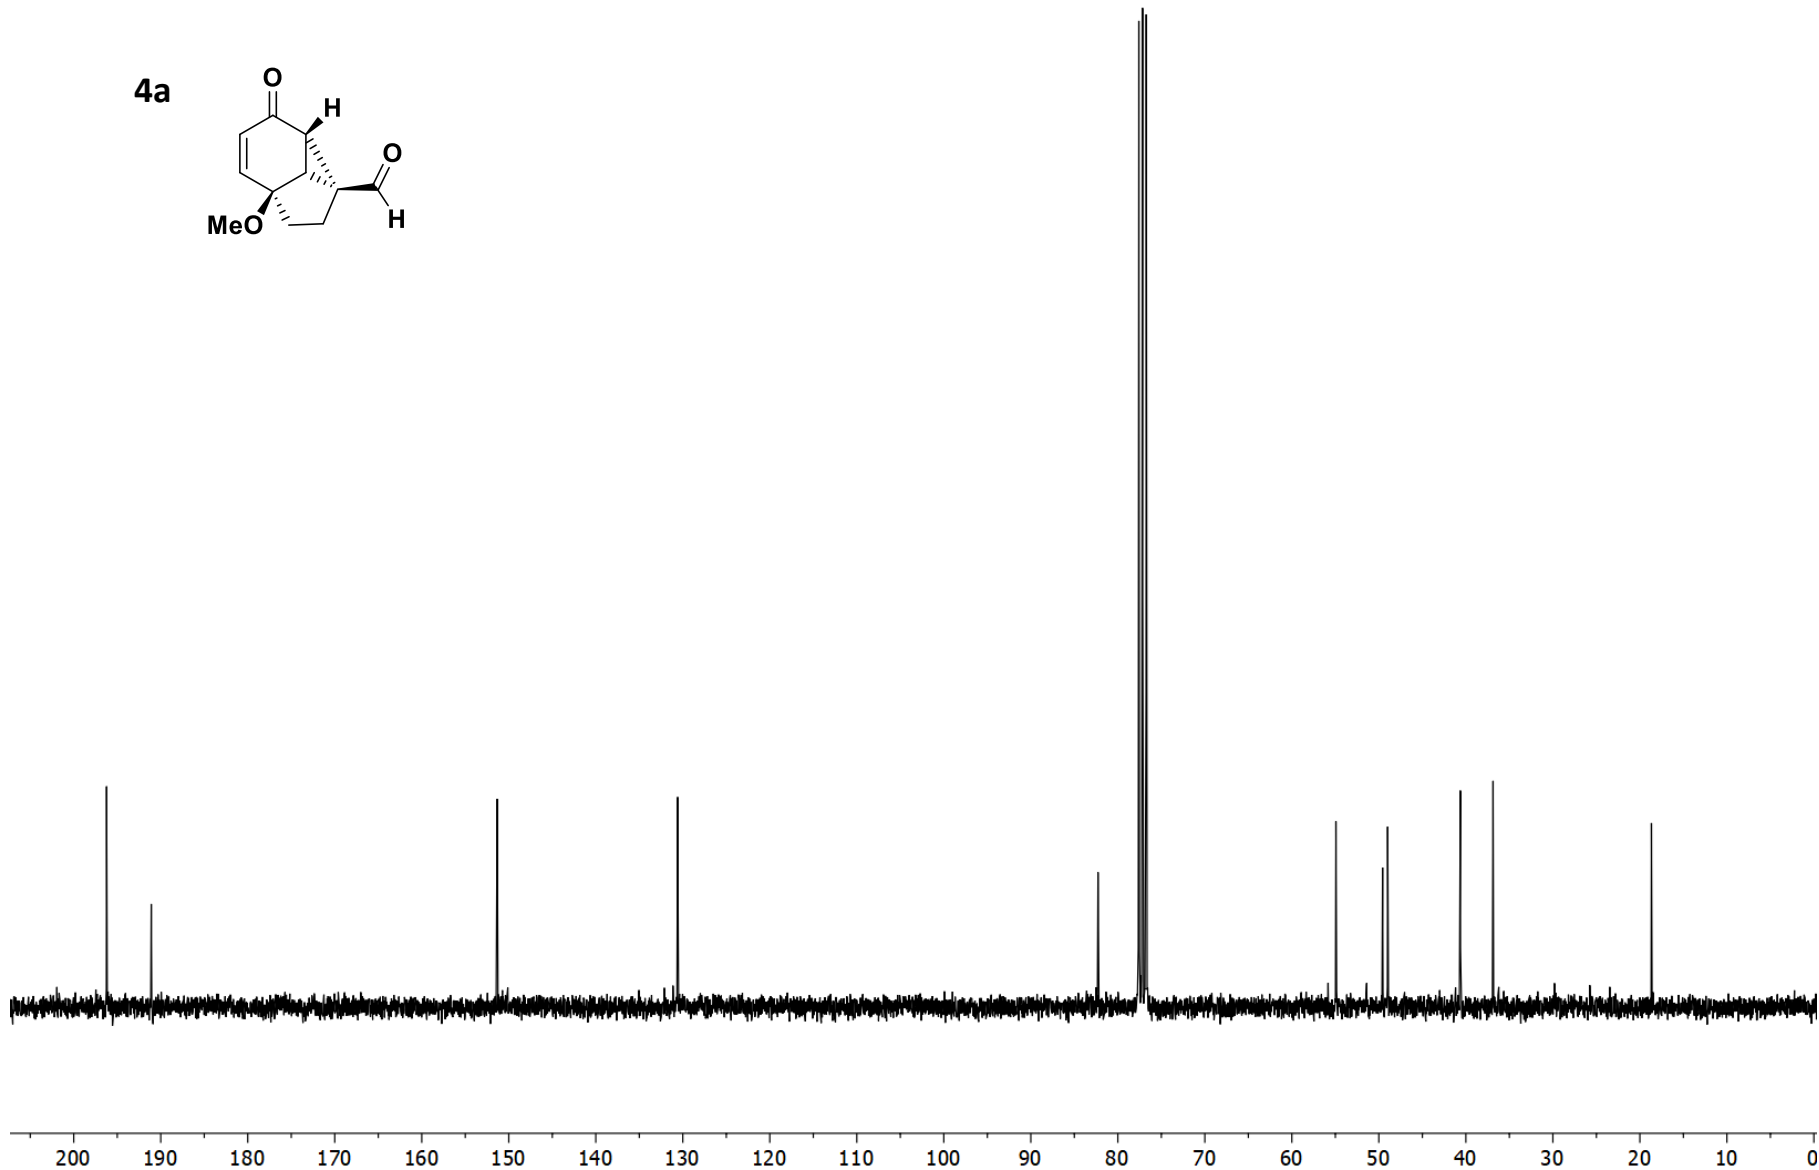

300 MHz, CDCl<sub>3</sub>

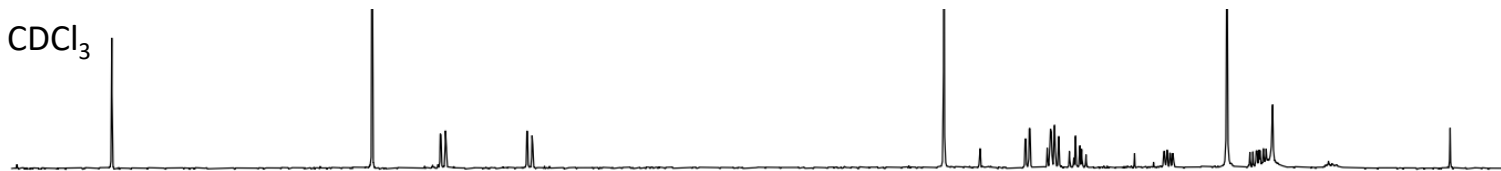

4a

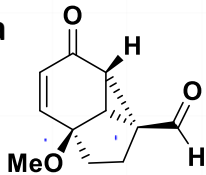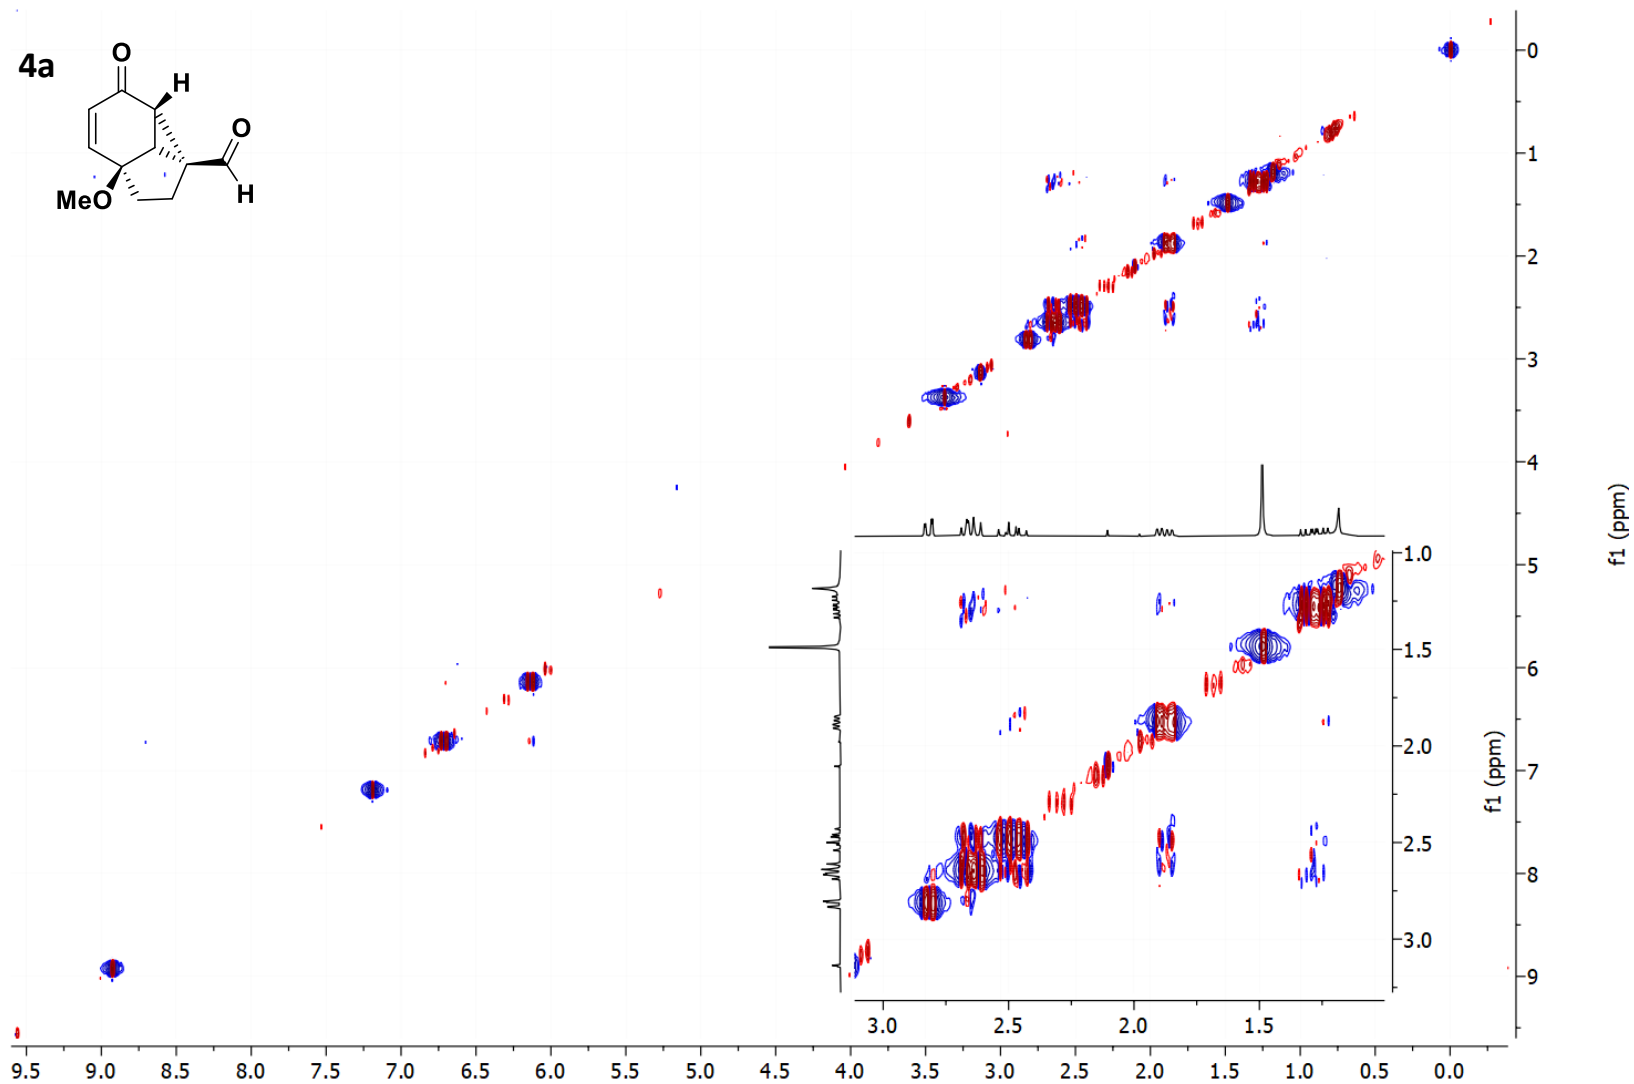

300 MHz, CDCl<sub>3</sub>

8.95

6.73  
6.72  
6.69  
6.69

6.10  
6.09  
6.06  
6.06

2.96  
2.97  
2.95  
2.94  
2.80  
2.78  
2.77  
2.76  
2.75  
2.73  
2.72  
2.68  
2.65  
2.64  
2.61  
2.14  
2.12  
2.10

1.41  
1.39  
1.37  
1.35  
1.34  
1.33  
1.32  
1.30  
1.29  
1.28

4b

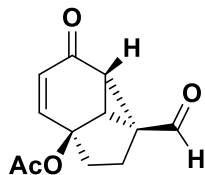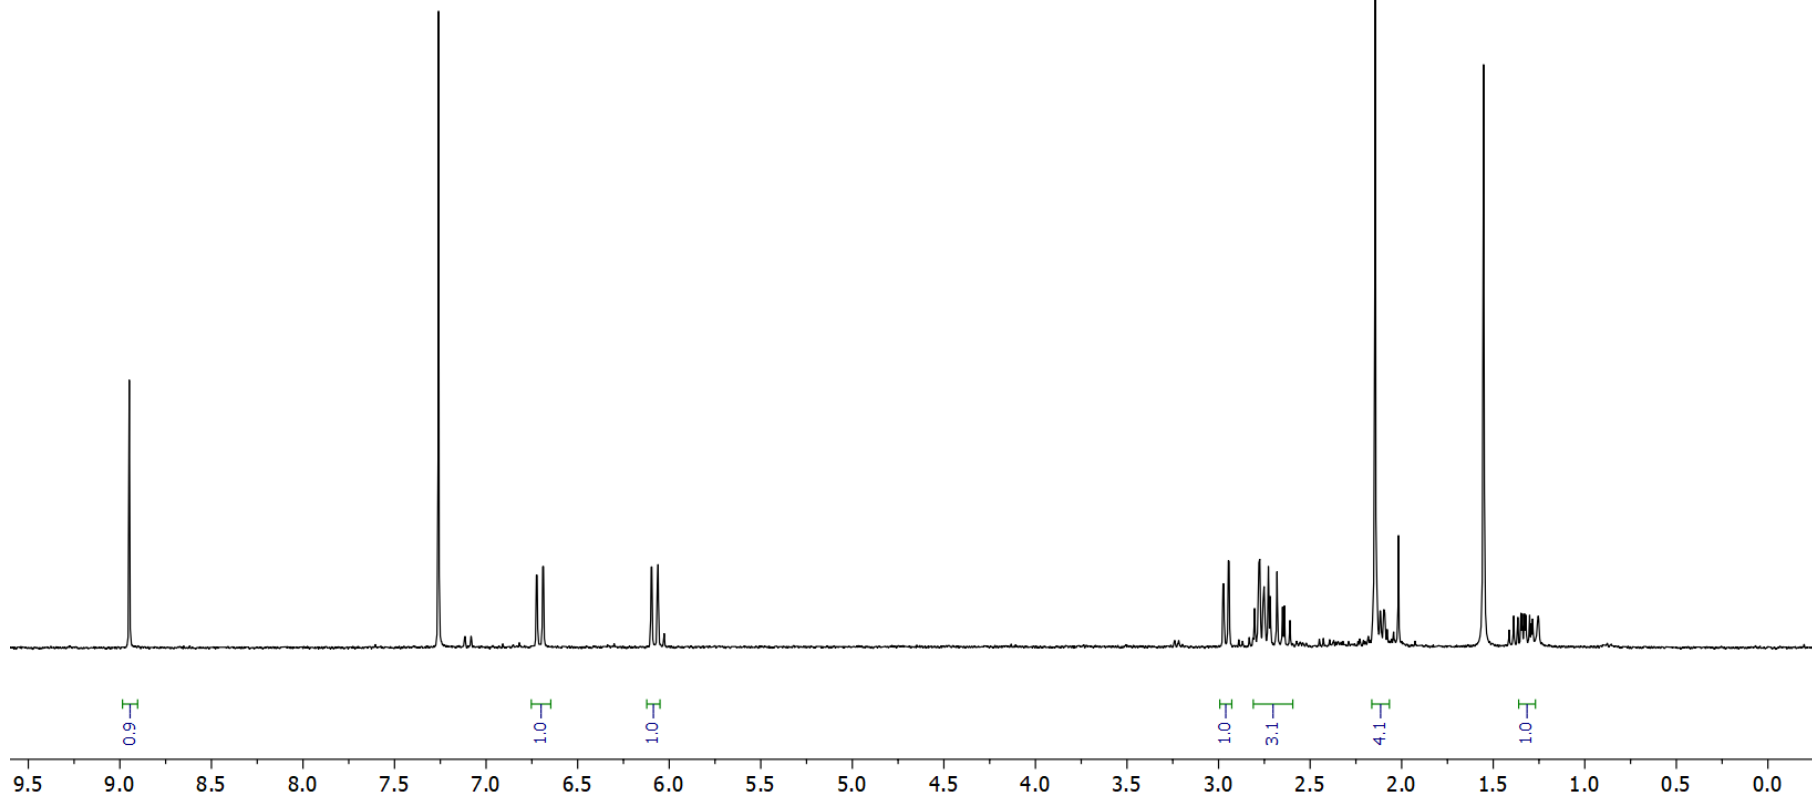

75 MHz, CDCl<sub>3</sub>

— 195.76

— 190.52

— 170.31

— 149.49

— 127.30

— 80.60

— 49.68

— 48.36

— 42.62

— 35.93

— 21.23

— 17.88

**4b**

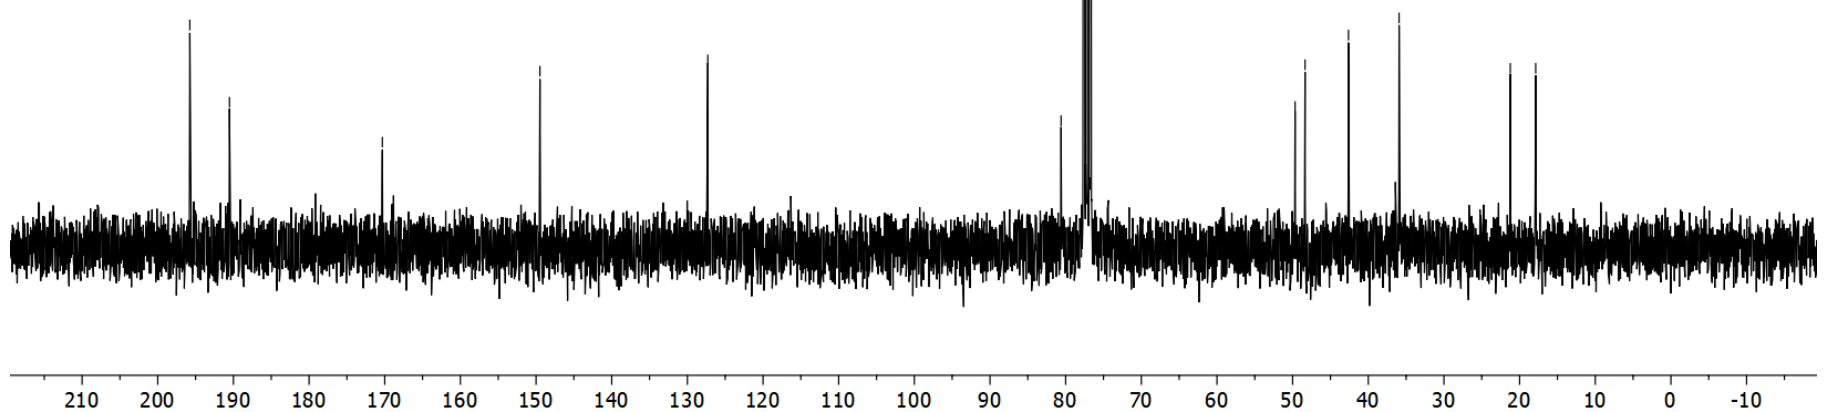

300 MHz, CDCl<sub>3</sub>

—9.03

6.76  
6.76  
6.73  
6.72

6.26  
6.26  
6.23  
6.22

3.99  
3.97  
3.94  
3.91  
2.87  
2.86  
2.84  
2.84  
2.80  
2.77  
2.75  
2.75  
2.74  
2.72  
2.72  
2.68  
2.65  
2.64  
2.61  
2.06  
2.06  
2.04  
2.04  
2.02  
2.02  
2.02  
2.00  
2.00  
1.42  
1.41  
1.40  
1.38  
1.37  
1.36  
1.35  
1.33  
1.32

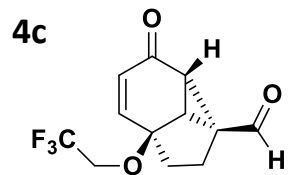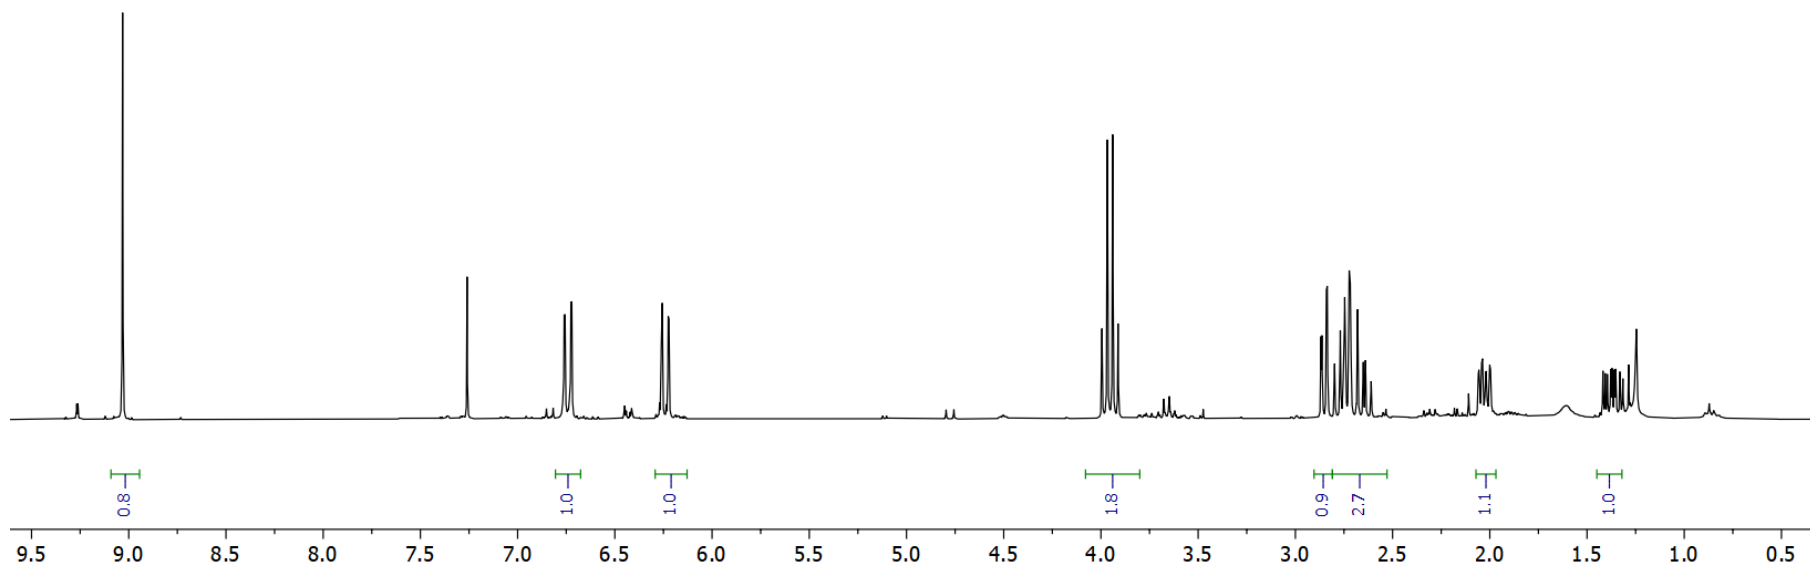

75 MHz, CDCl<sub>3</sub>

— 195.79

— 190.31

— 148.68

— 131.34

— 125.21

— 121.53

— 82.96

65.95

65.48

65.02

64.55

49.45

49.03

40.60

36.61

— 18.82

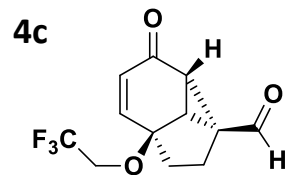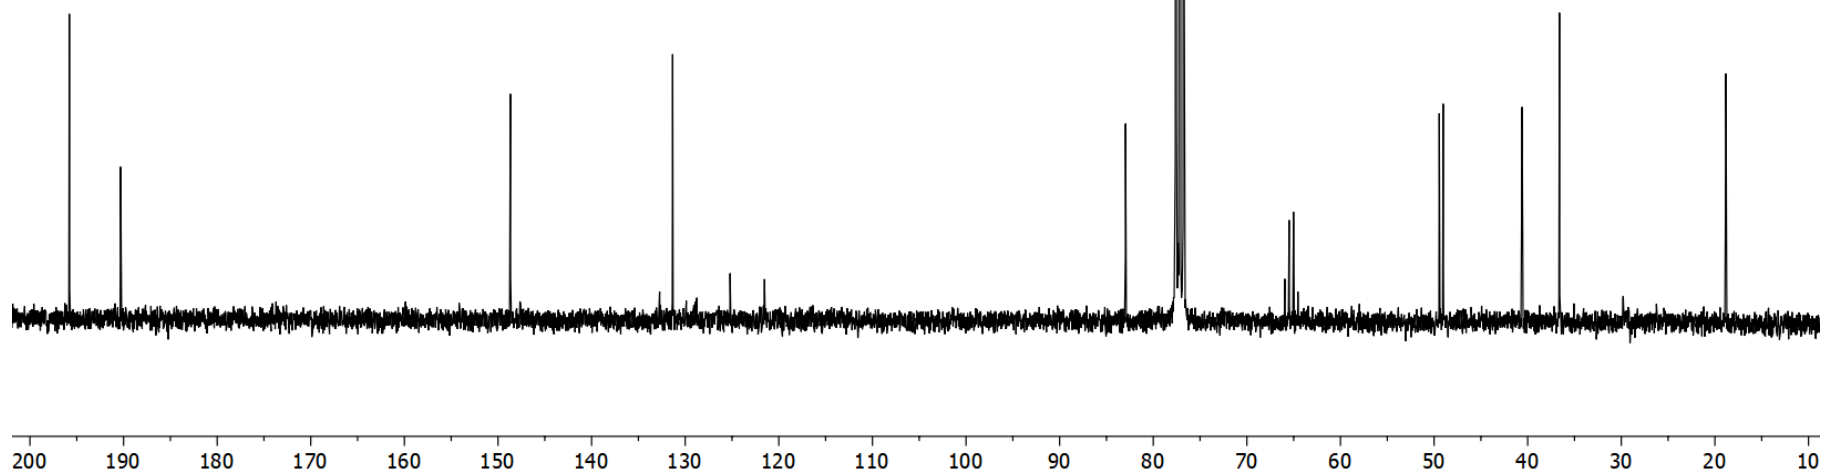

282 MHz, CDCl<sub>3</sub>

{  
-74.25  
-74.28  
-74.31  
}

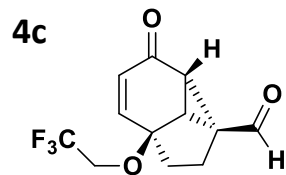

0 0 -10 -20 -30 -40 -50 -60 -70 -80 -90 -100 -110 -120 -130 -140 -150 -160 -170 -180 -19

300 MHz, CDCl<sub>3</sub>

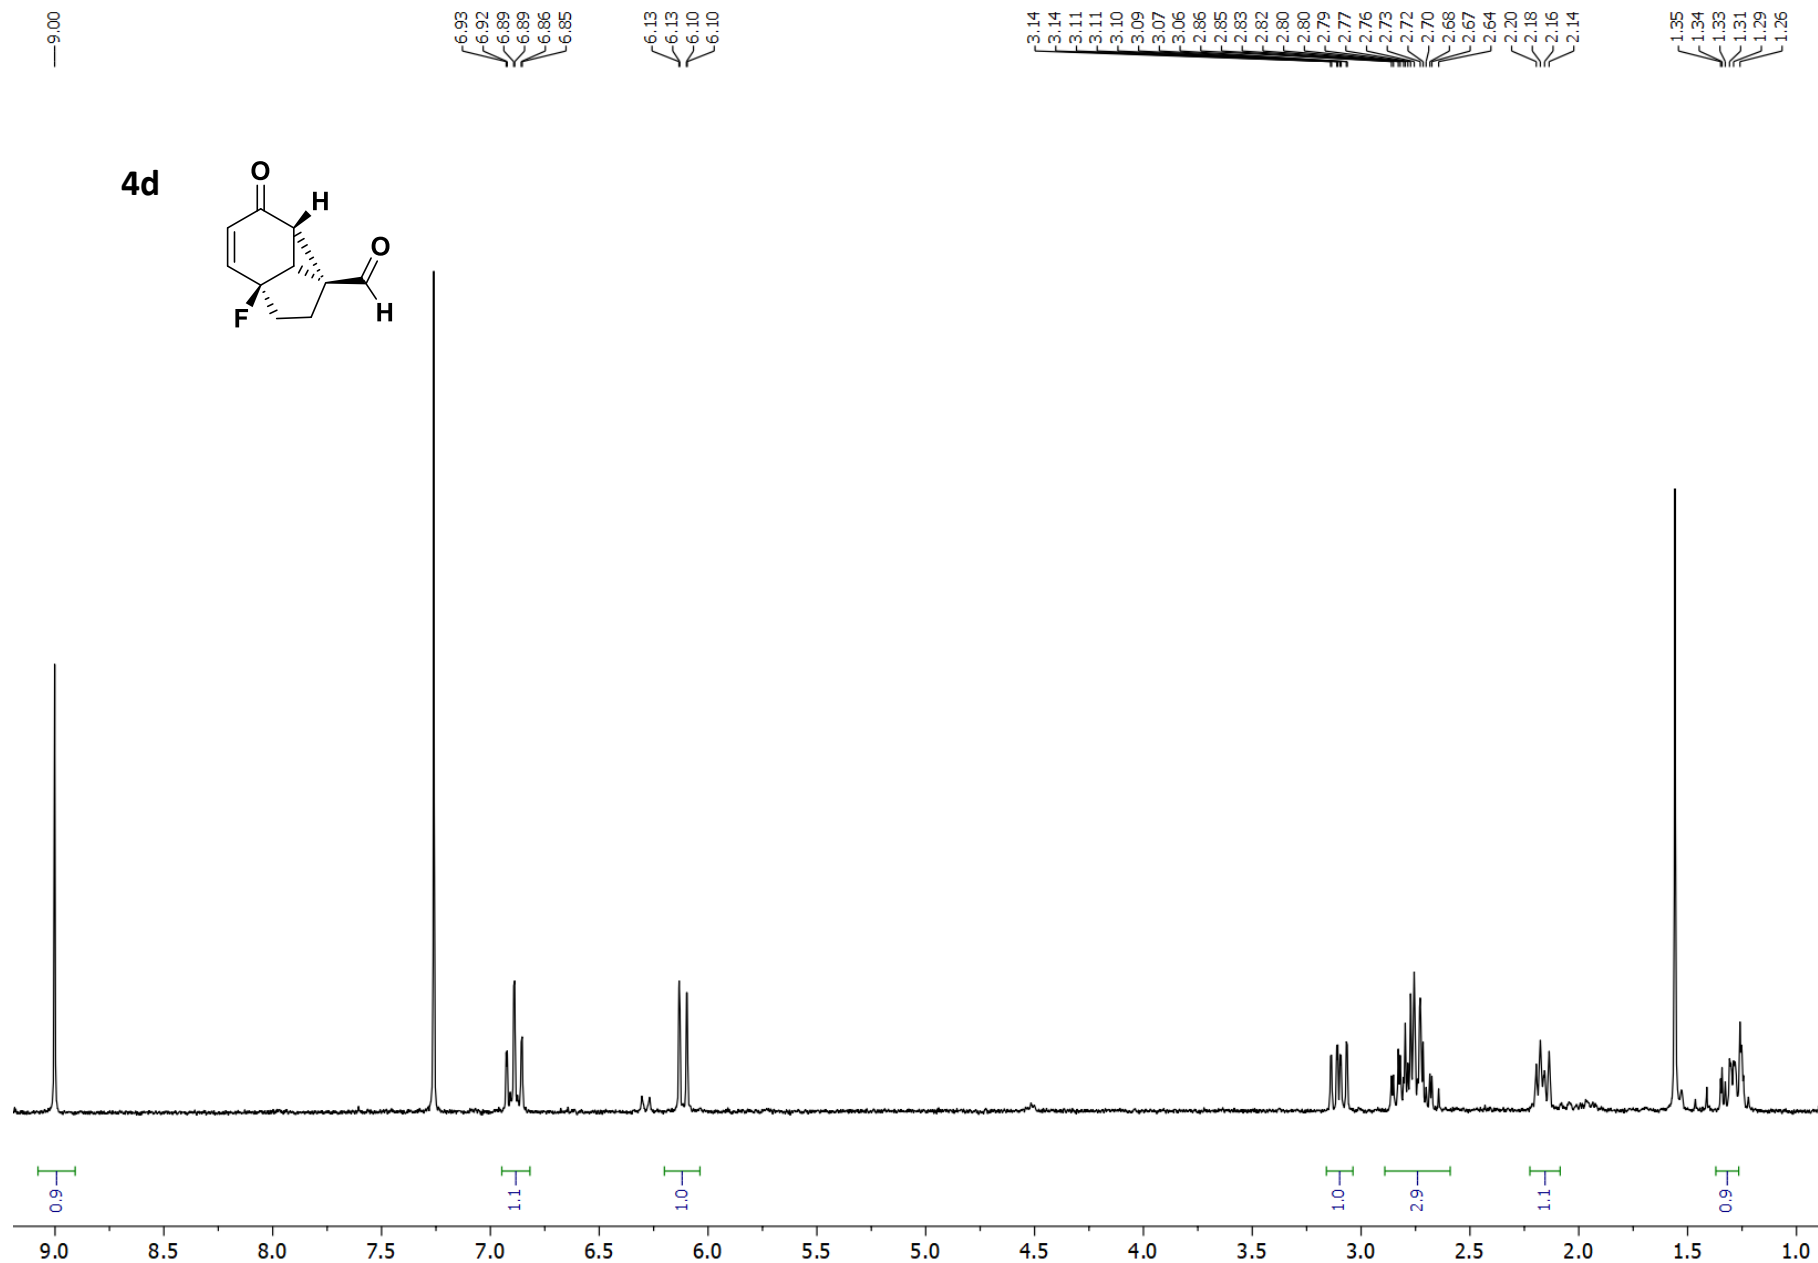

75 MHz, CDCl<sub>3</sub>

— 195.30  
— 190.25

— 147.19  
— 146.76

— 128.84

— 96.60  
— 94.09

— 49.38  
— 48.58  
— 48.26  
— 41.98  
— 41.52  
— 35.23  
— 35.19

— 18.34  
— 18.22

**4d**

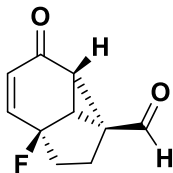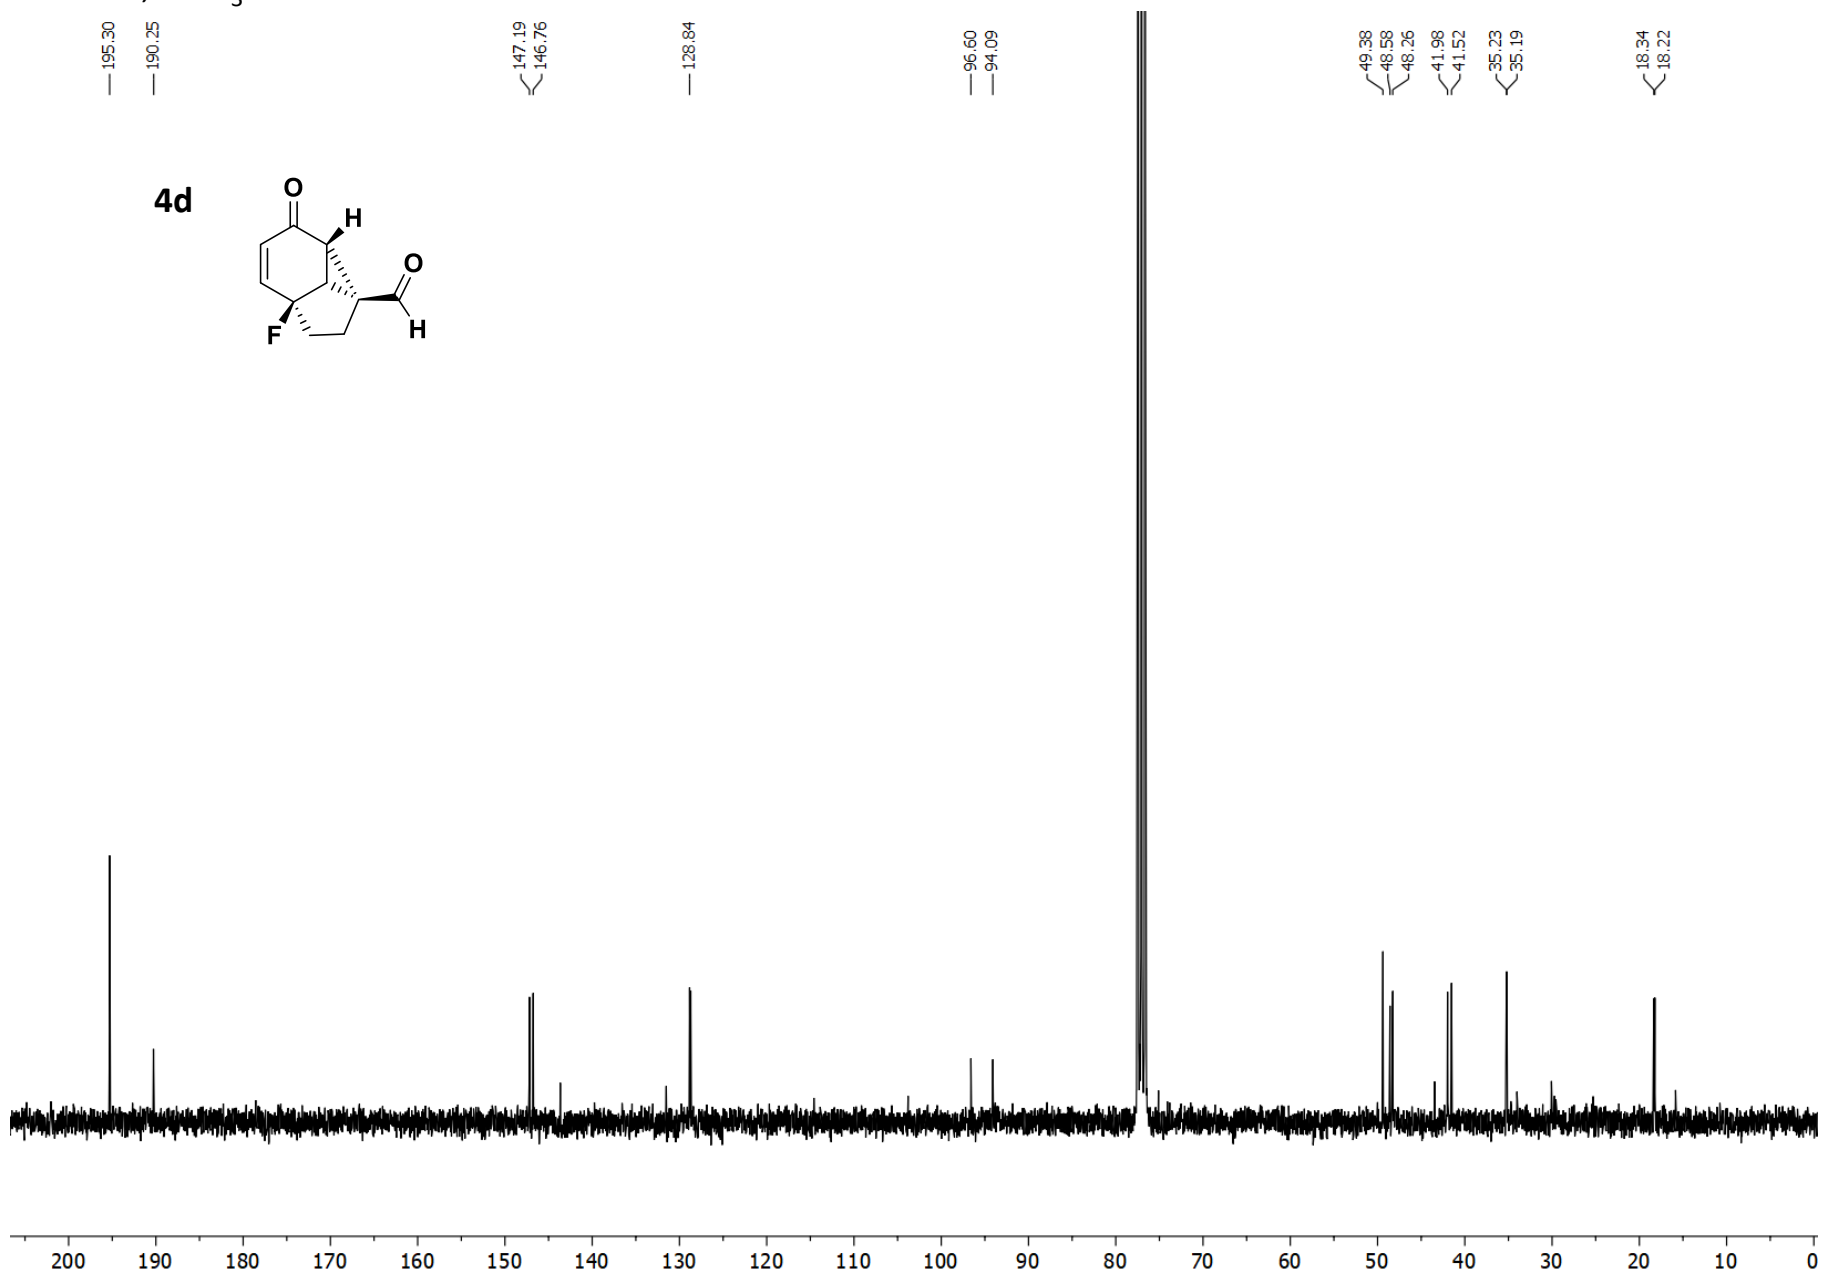

282 MHz, CDCl<sub>3</sub>

4d



149.44  
150.60  
150.62  
150.63  
150.64  
150.65  
150.66  
150.67  
150.68  
150.69  
150.70  
150.71  
150.72  
150.73  
150.75  
150.75

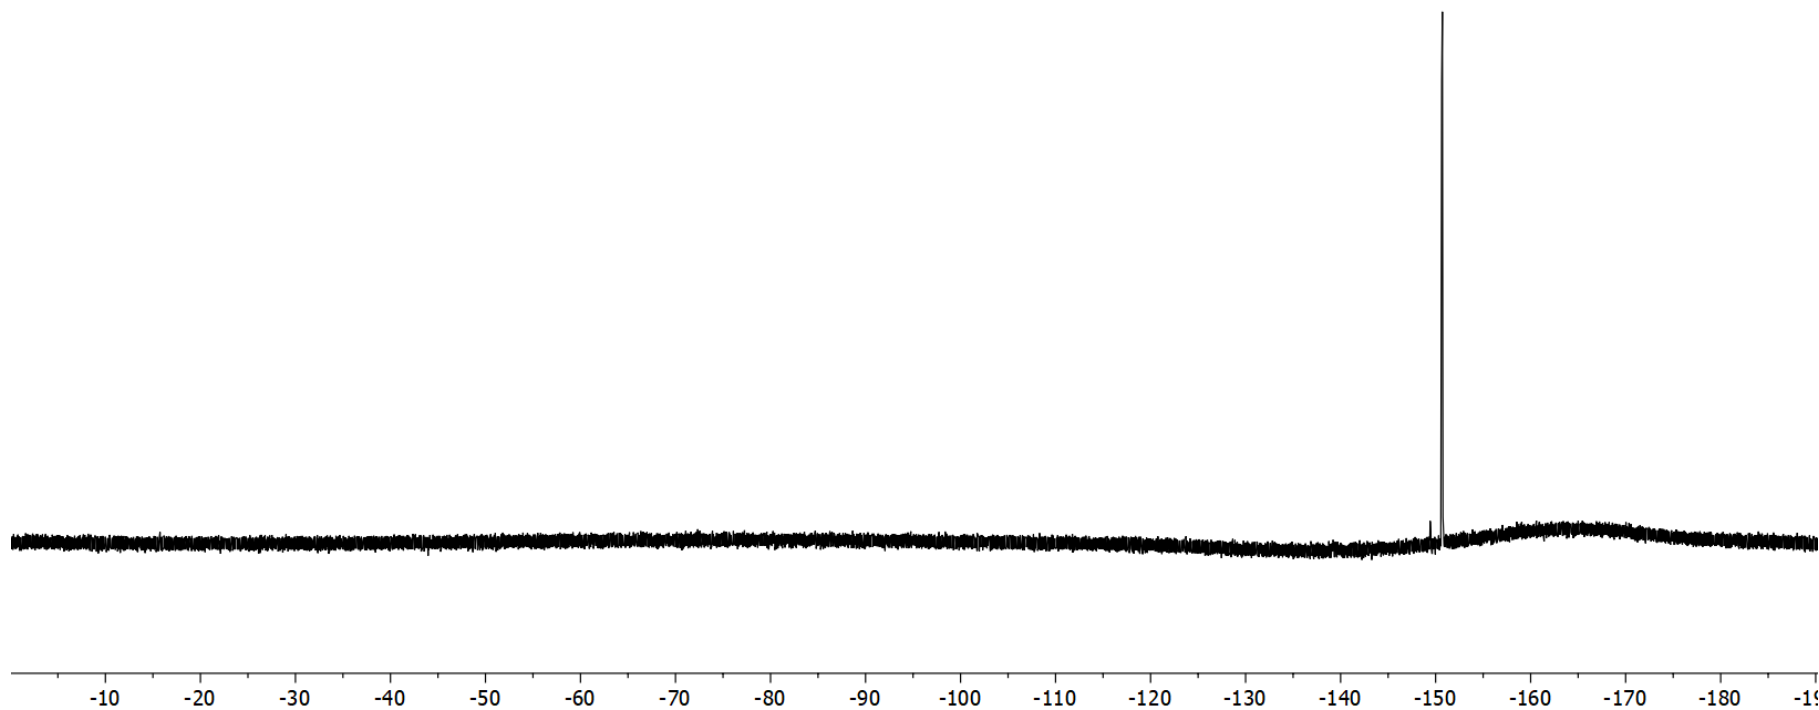

300 MHz, CDCl<sub>3</sub>

—9.13

6.61  
6.61  
6.58  
6.58  
6.16  
6.16  
6.13  
6.13

4.85  
4.85  
4.81  
4.81

3.55  
3.54  
3.48  
3.45  
3.27  
3.23  
3.23  
3.20  
3.20  
2.91  
2.91  
2.91  
2.89  
2.88  
2.88

4e

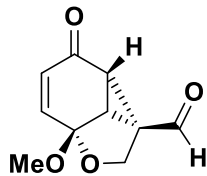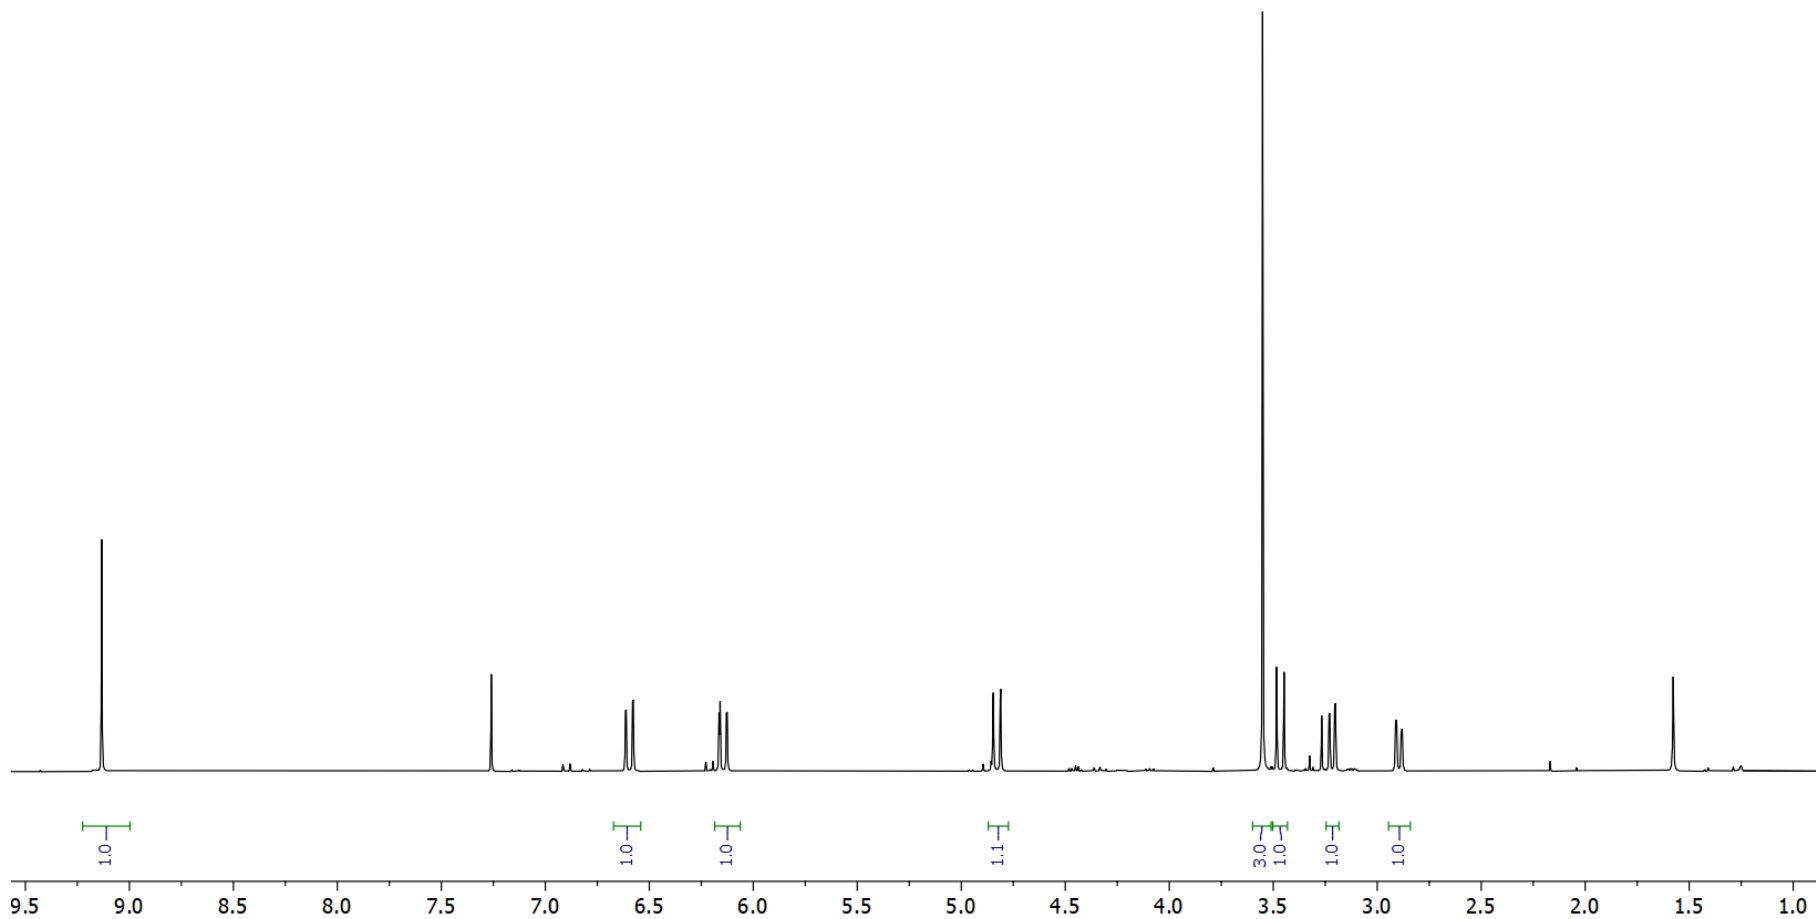

75 MHz, CDCl<sub>3</sub>

— 193.44  
— 190.37

— 143.63

— 129.01

— 102.70

— 61.63

— 53.36

— 50.43

— 38.33  
— 36.37

**4e**

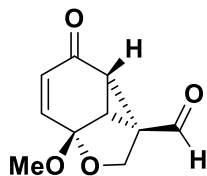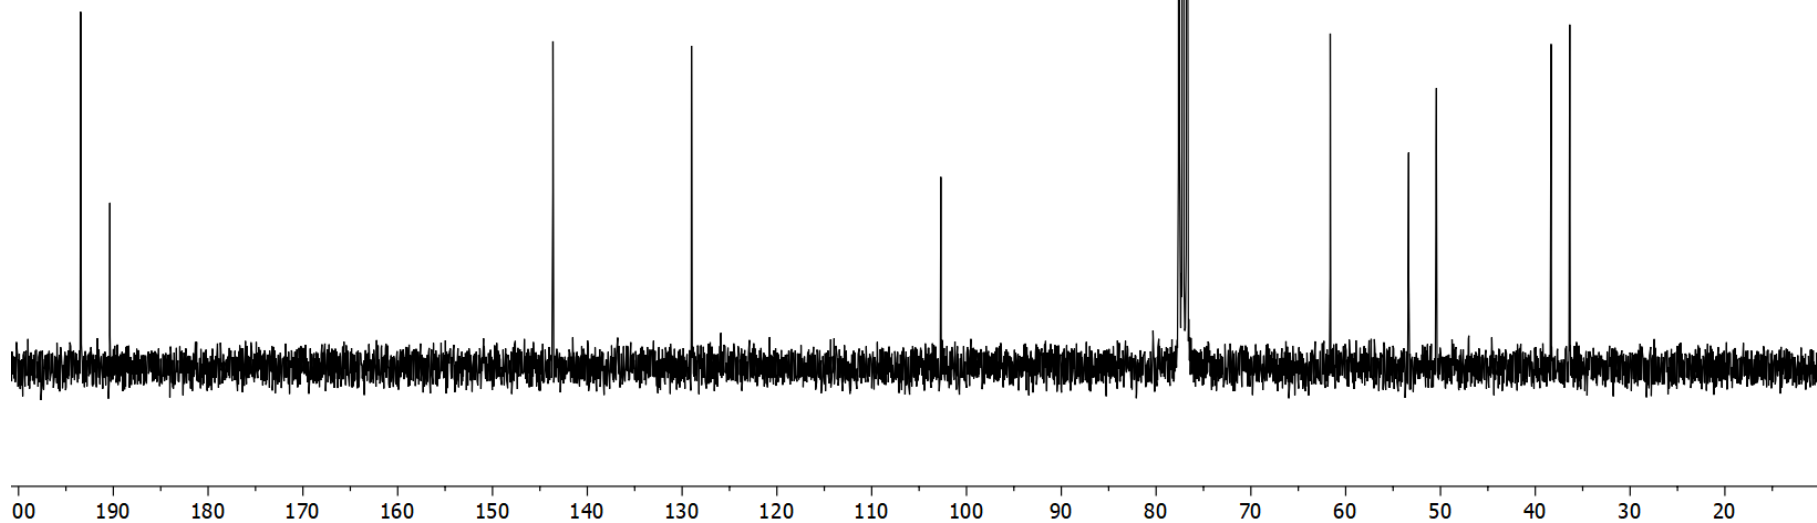

300 MHz, CDCl<sub>3</sub>

—9.12

6.37  
6.37  
6.34  
6.33  
6.18  
6.17  
6.14  
6.14

4.72  
4.68

3.54  
3.50  
2.94  
2.94  
2.92  
2.92  
2.88  
2.87  
2.85  
2.85

—1.65

4f

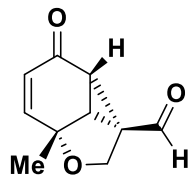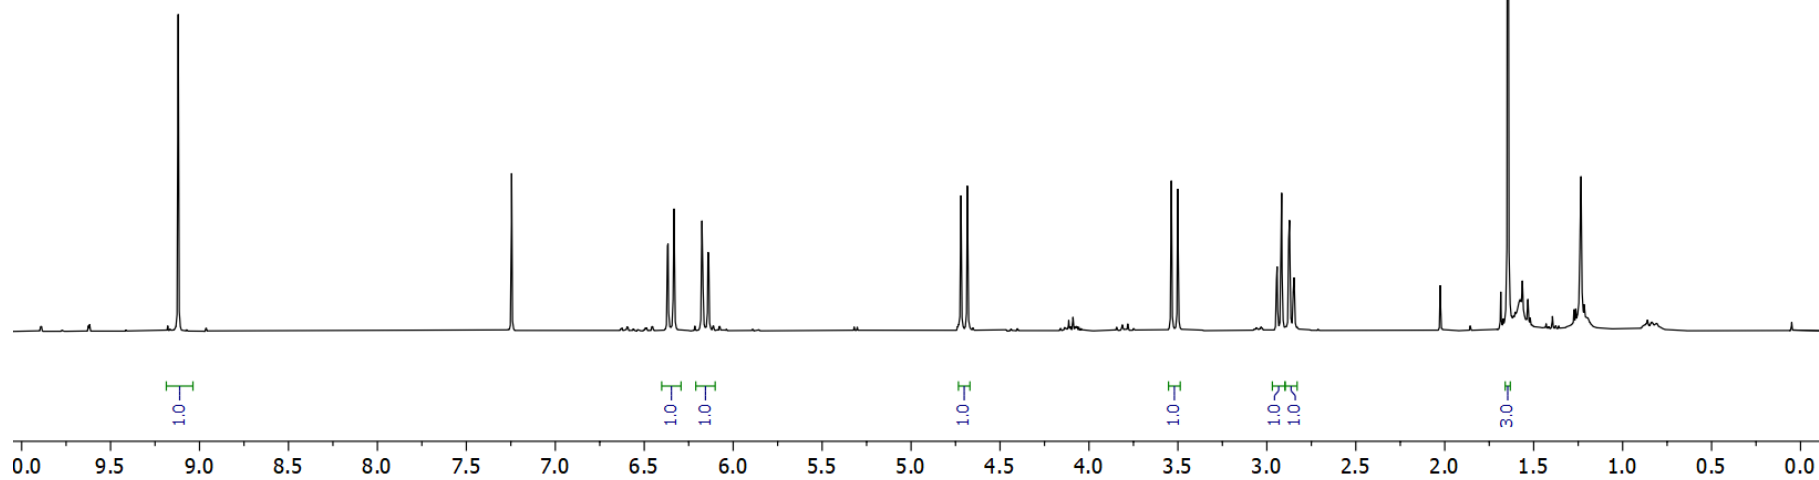

75 MHz, CDCl<sub>3</sub>

— 194.14  
— 190.69

— 145.34

— 128.85

— 76.96

— 62.82

— 55.64

— 43.27

— 38.90

— 25.10

**4f**

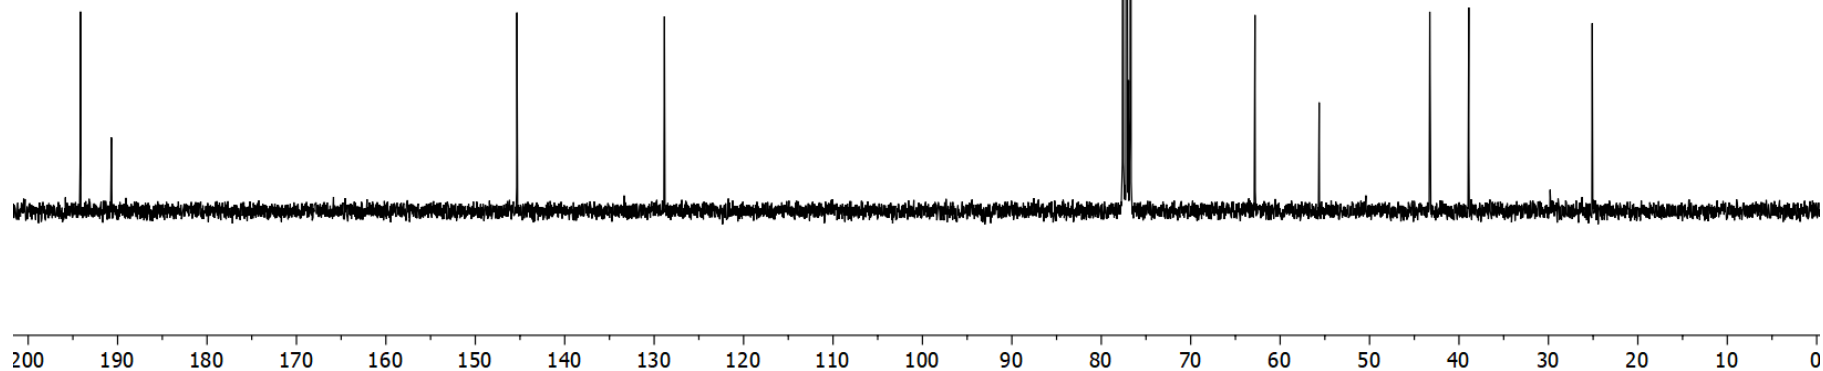

300 MHz, CDCl<sub>3</sub>

8.79

6.43  
6.43  
6.40  
6.39  
6.07  
6.06  
6.03  
6.03

3.74  
3.72  
3.71  
3.70  
3.69  
3.68  
3.67  
3.65  
3.58  
3.57  
3.56  
3.55  
3.54  
3.53  
3.52  
3.51  
2.75  
2.73  
2.72  
2.70  
2.70  
2.68  
2.67  
2.65  
2.40  
2.40  
2.38  
2.37  
2.11  
2.10  
2.08  
2.08  
1.58  
1.57  
1.56  
1.53  
1.51

4g

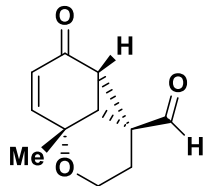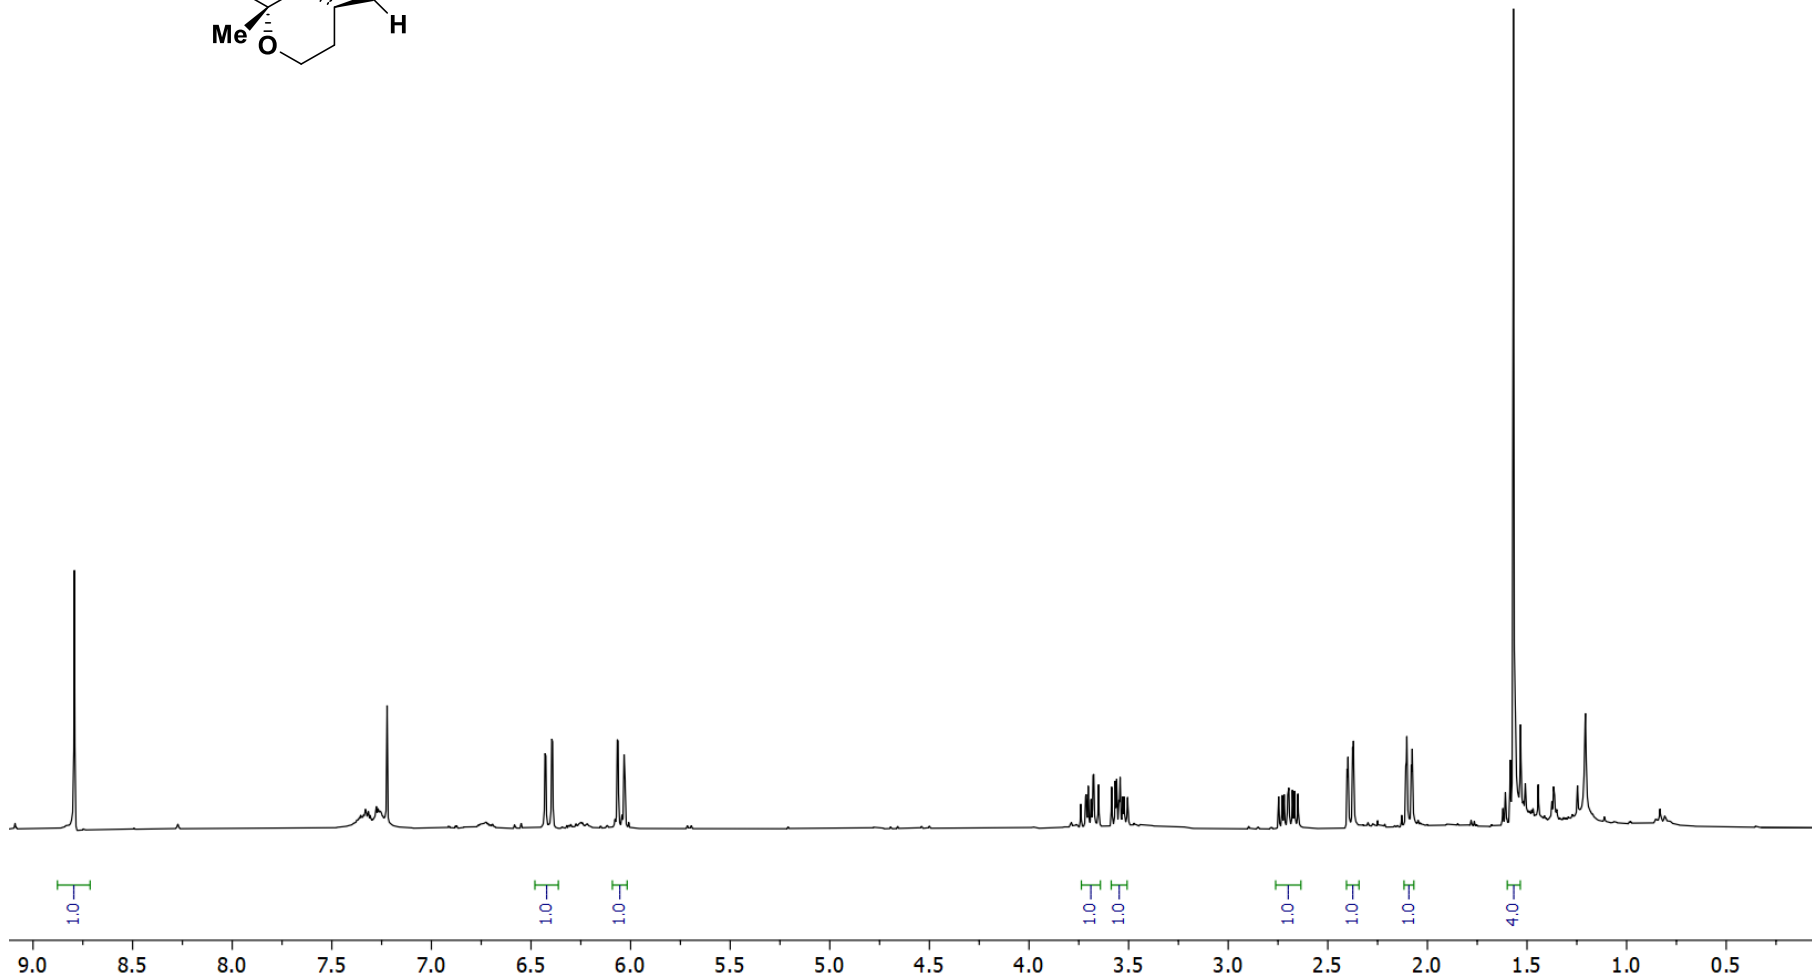

75 MHz, CDCl<sub>3</sub>

—197.32  
—191.59

—151.56

—129.66

—65.36

—58.80

—35.06  
—30.16  
—29.43  
—27.43

—14.50

**4g**

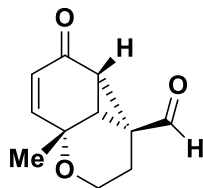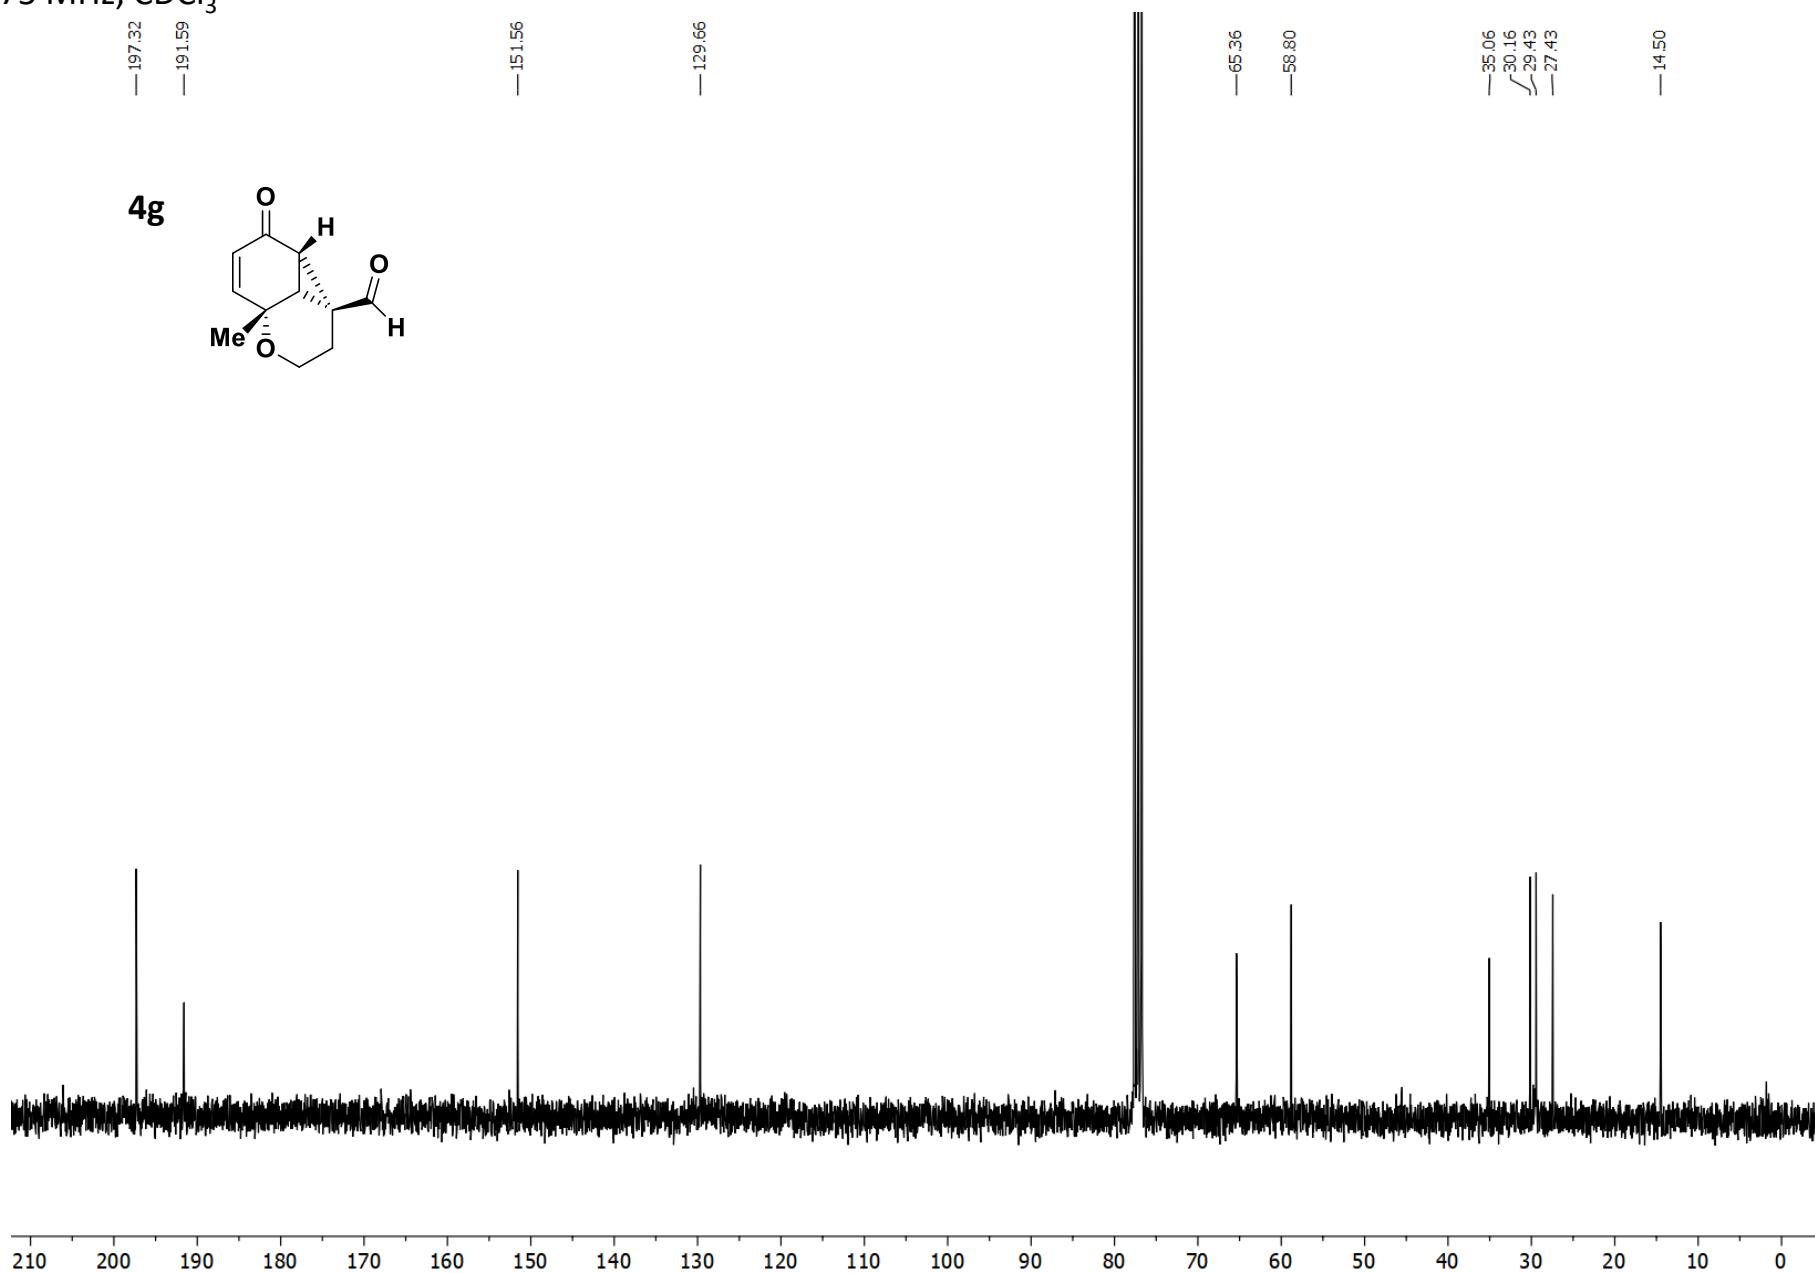

300 MHz, CDCl<sub>3</sub>

8.85

6.61  
6.58  
6.57  
6.16  
6.16  
6.13  
6.12

3.87  
3.85  
3.84  
3.83  
3.82  
3.81  
3.80  
3.78  
3.75  
3.73  
3.71  
3.69  
3.68  
3.49  
2.75  
2.73  
2.73  
2.71  
2.69  
2.68  
2.67  
2.66  
2.49  
2.48  
2.46  
2.45  
2.39  
2.39  
2.37  
2.36  
1.59  
1.57  
1.56  
1.55  
1.54  
1.52  
1.52  
1.50

4h

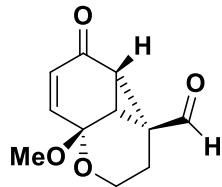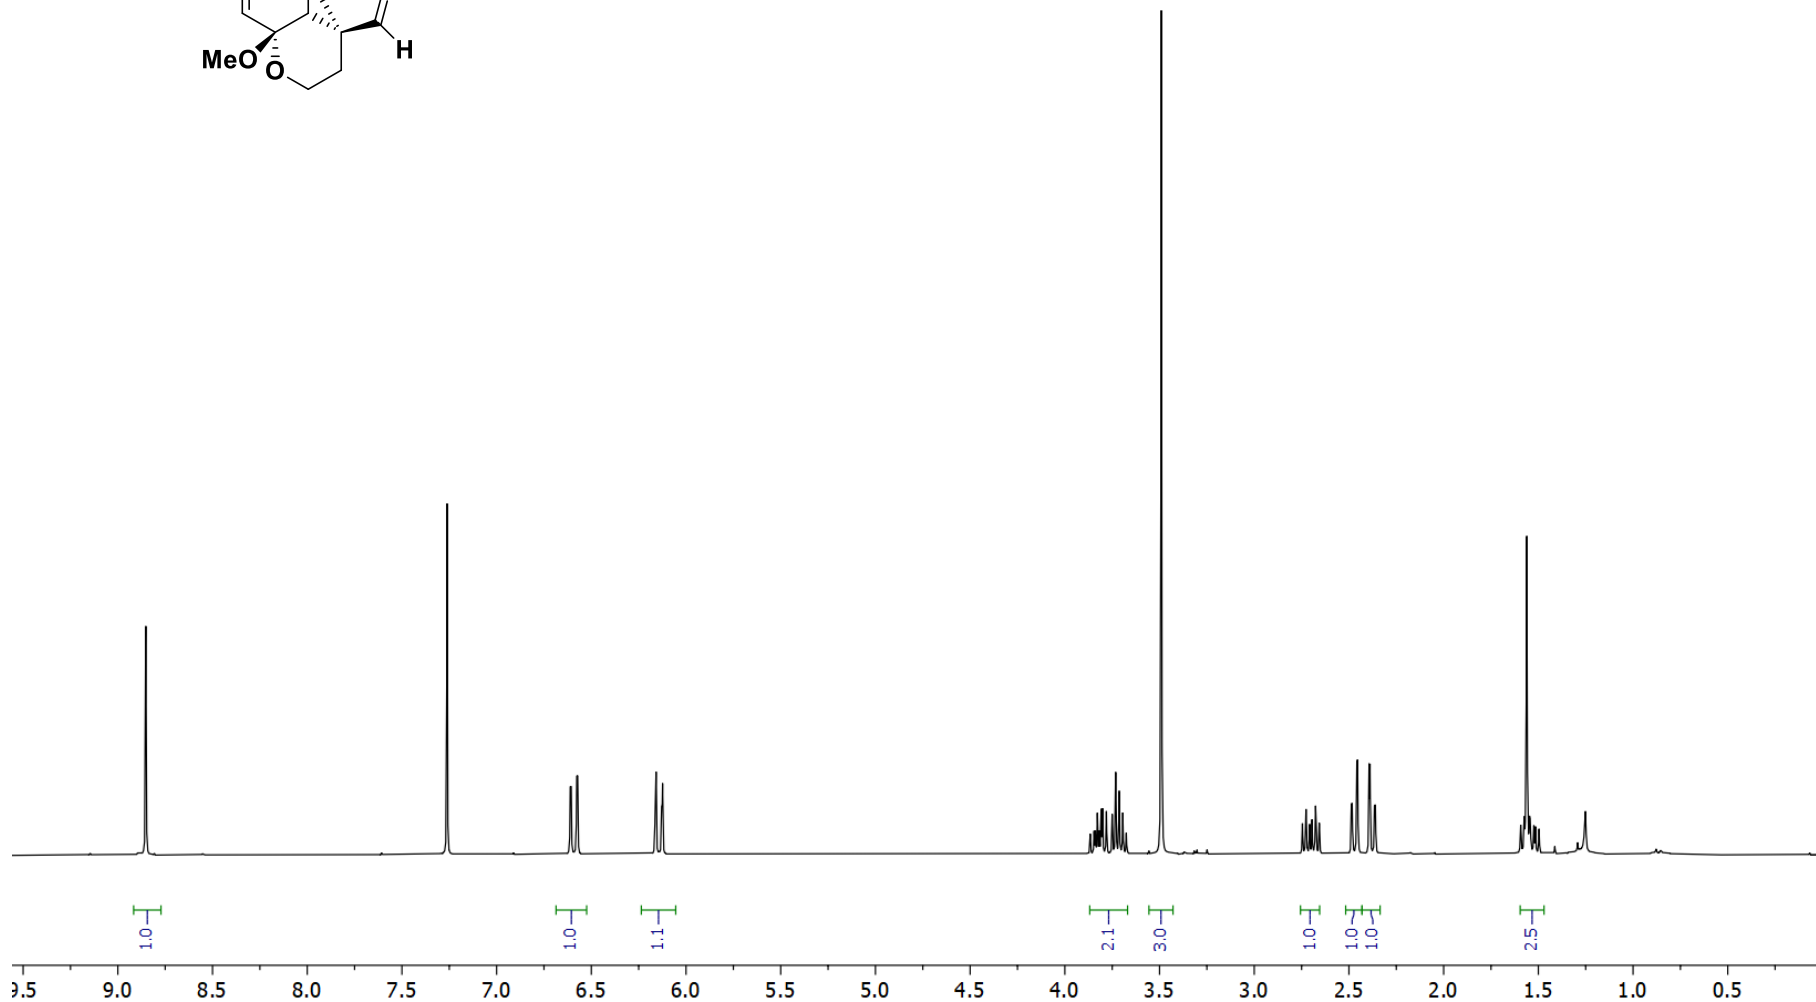

75 MHz, CDCl<sub>3</sub>

— 196.47

— 190.85

— 146.44

— 129.84

— 91.63

— 61.47

— 49.56

— 37.15

— 28.87

— 24.84

— 16.02

**4h**

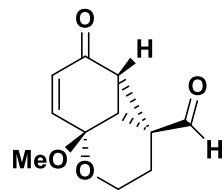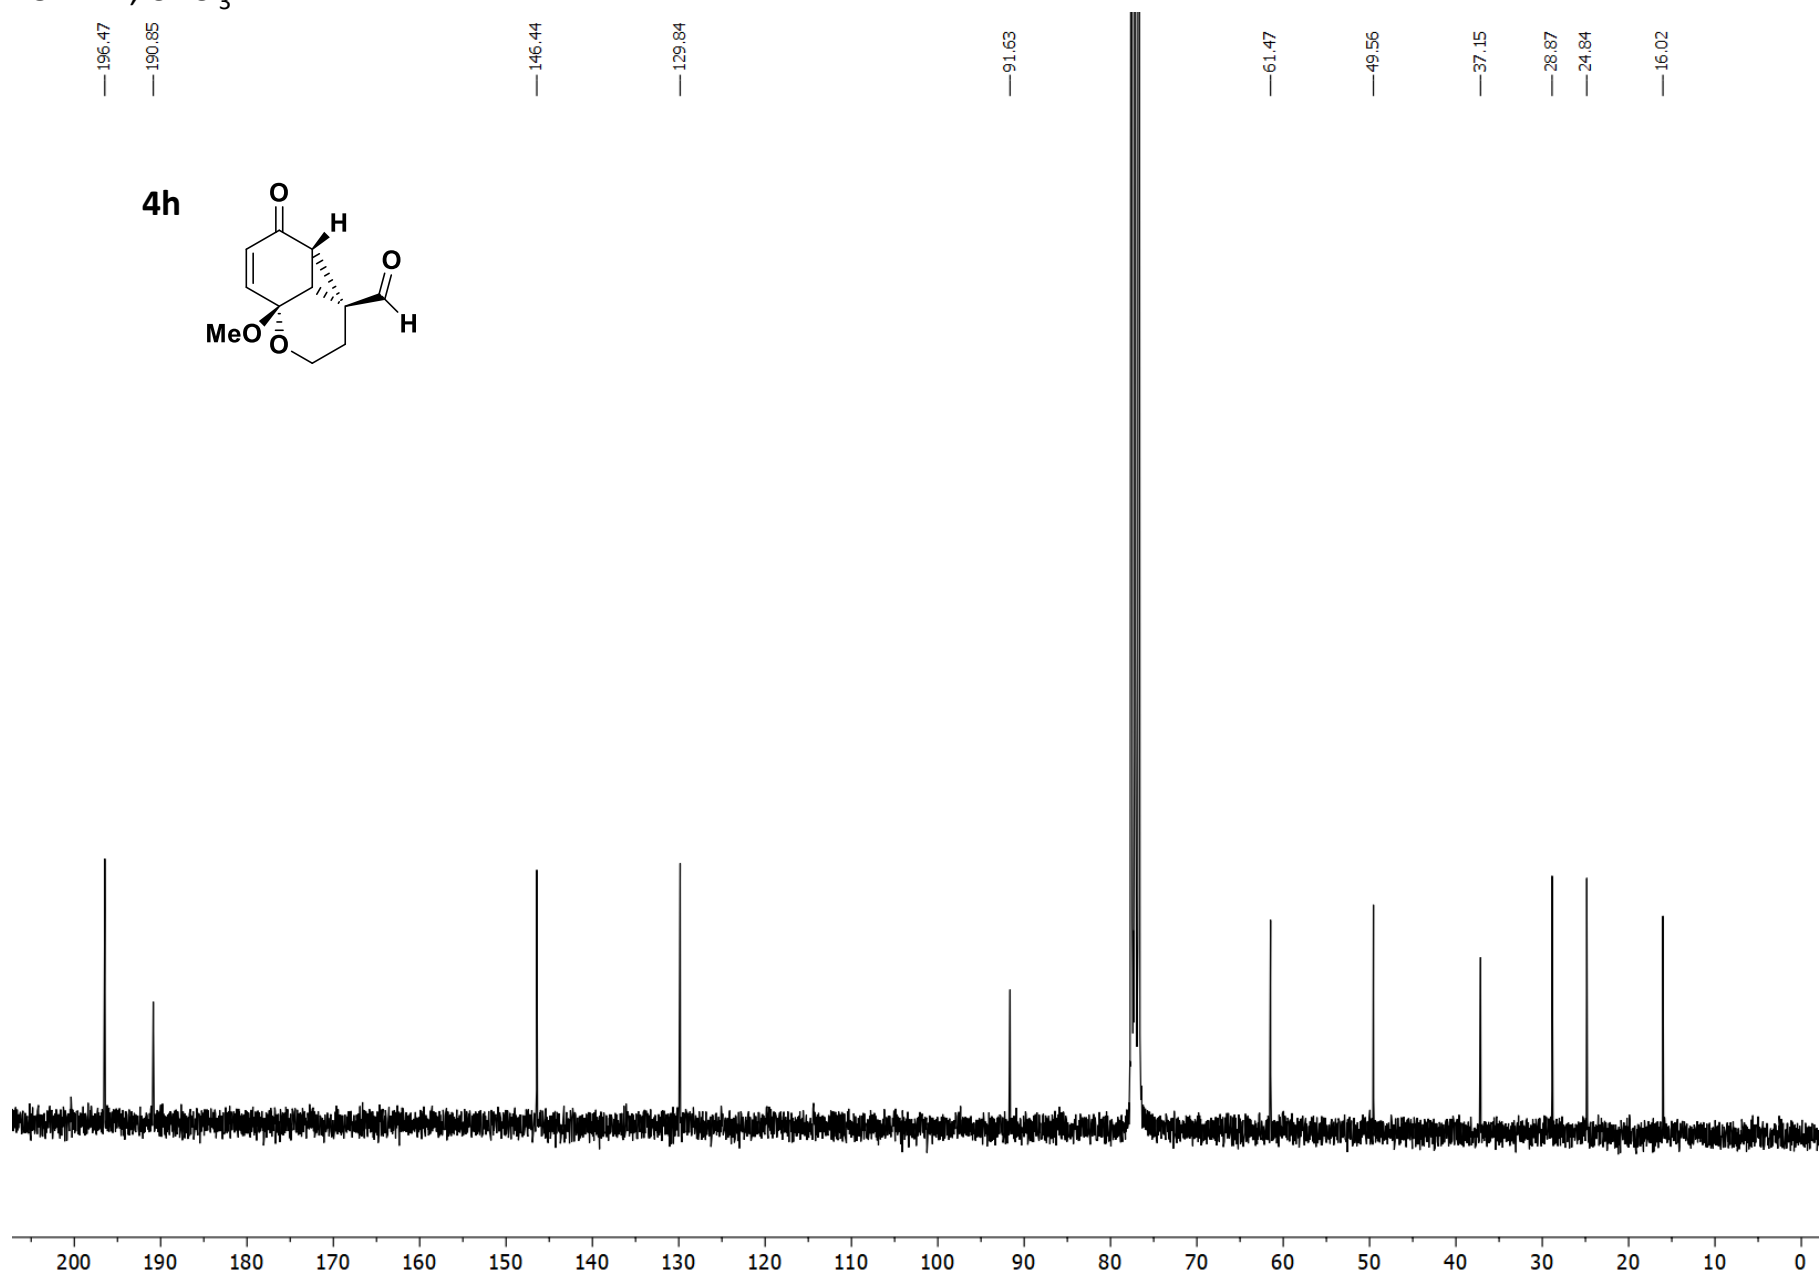

300 MHz, CDCl<sub>3</sub>

8.86  
7.77  
7.75  
7.34  
7.33  
7.33  
7.32  
7.31  
7.30  
7.30  
7.26  
7.26  
7.26  
7.25  
7.25  
7.24  
7.24  
7.24  
7.23  
6.19  
6.19  
6.18  
6.18  
6.16  
6.15  
6.15  
6.15  
6.12  
6.12  
6.12  
6.09  
6.09  
6.08

3.88  
3.82  
3.59  
3.58

2.73  
2.73  
2.73  
2.71  
2.70  
2.46  
2.46  
2.44  
2.43  
2.16  
2.10

4i

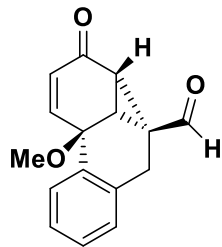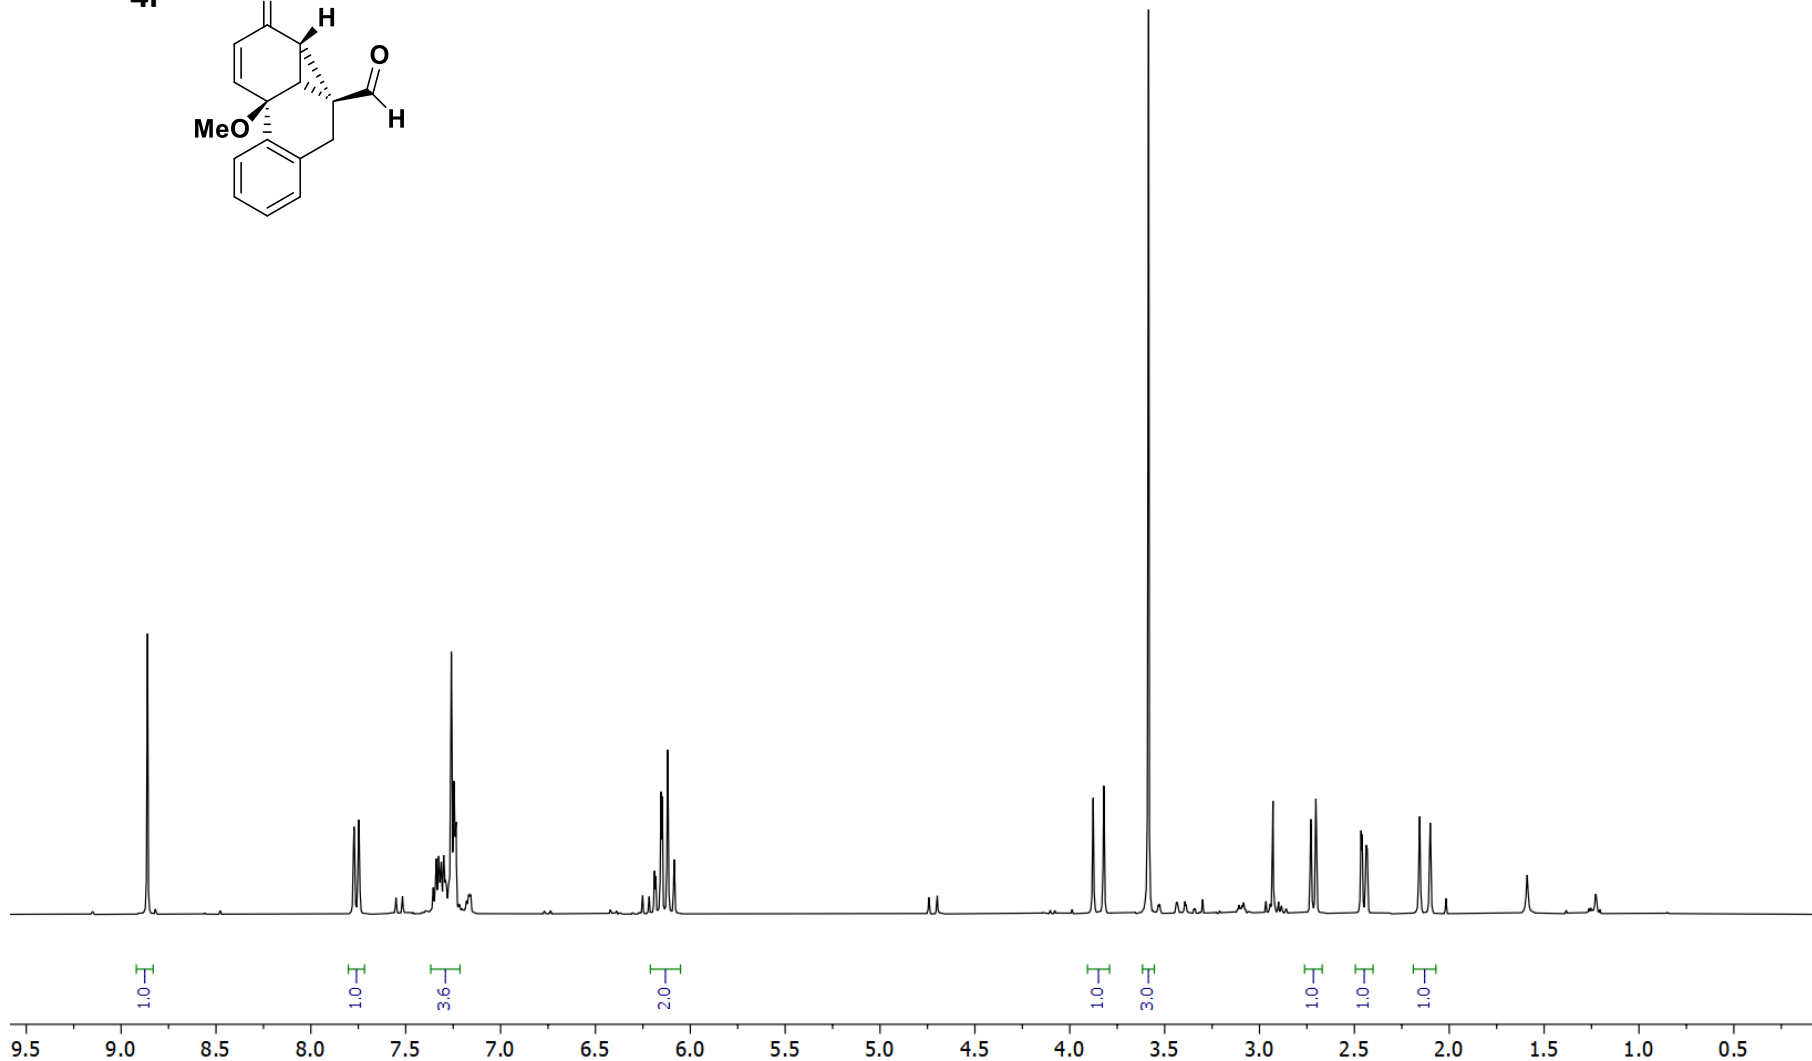

75 MHz, CDCl<sub>3</sub>

— 196.49

— 190.85

— 147.21

— 137.34  
— 136.54

— 129.13  
— 128.58  
— 128.14  
— 127.96  
— 124.36

— 72.34

— 52.37

— 40.16

— 32.66  
— 32.24

— 22.80

**4i**

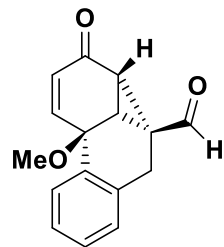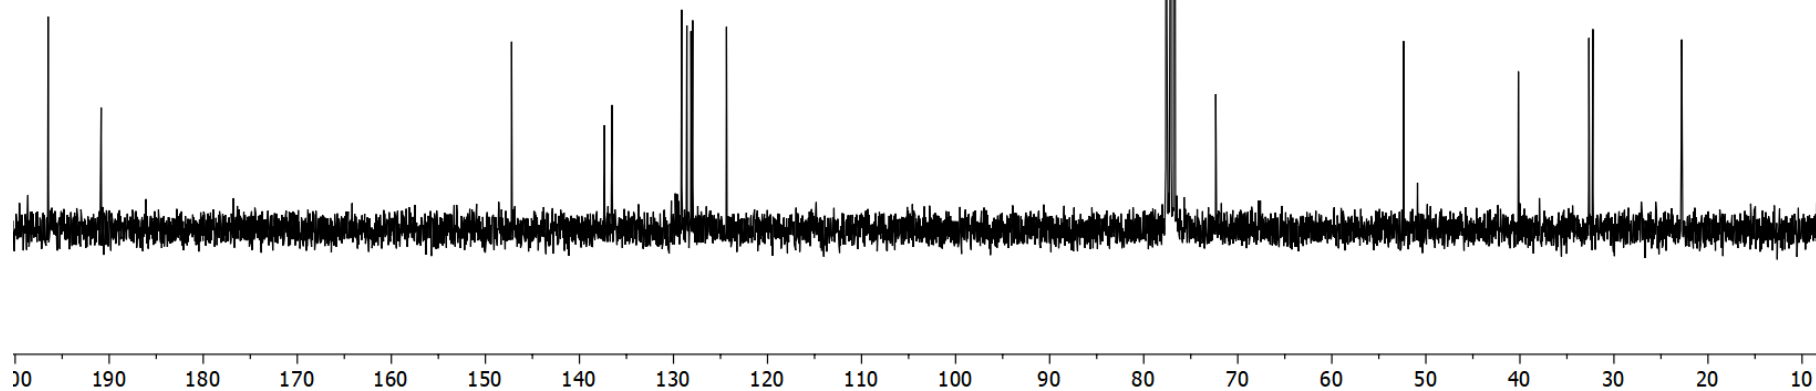

300 MHz, CDCl<sub>3</sub>

9.00

6.61  
6.61  
6.58  
6.57

6.08  
6.07  
6.04  
6.04

5.12  
5.12  
5.11  
5.11  
5.00  
4.99  
4.99  
4.99

3.50  
3.40  
3.39  
3.39  
3.37  
3.36  
3.34  
3.33  
3.33  
3.32  
3.21  
2.98  
2.97  
2.95  
2.94  
2.79  
2.79  
2.79  
2.77  
2.76  
2.76  
2.23  
2.22  
2.21  
2.17  
2.16  
2.15

4j

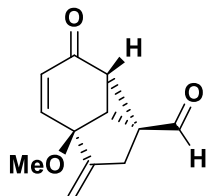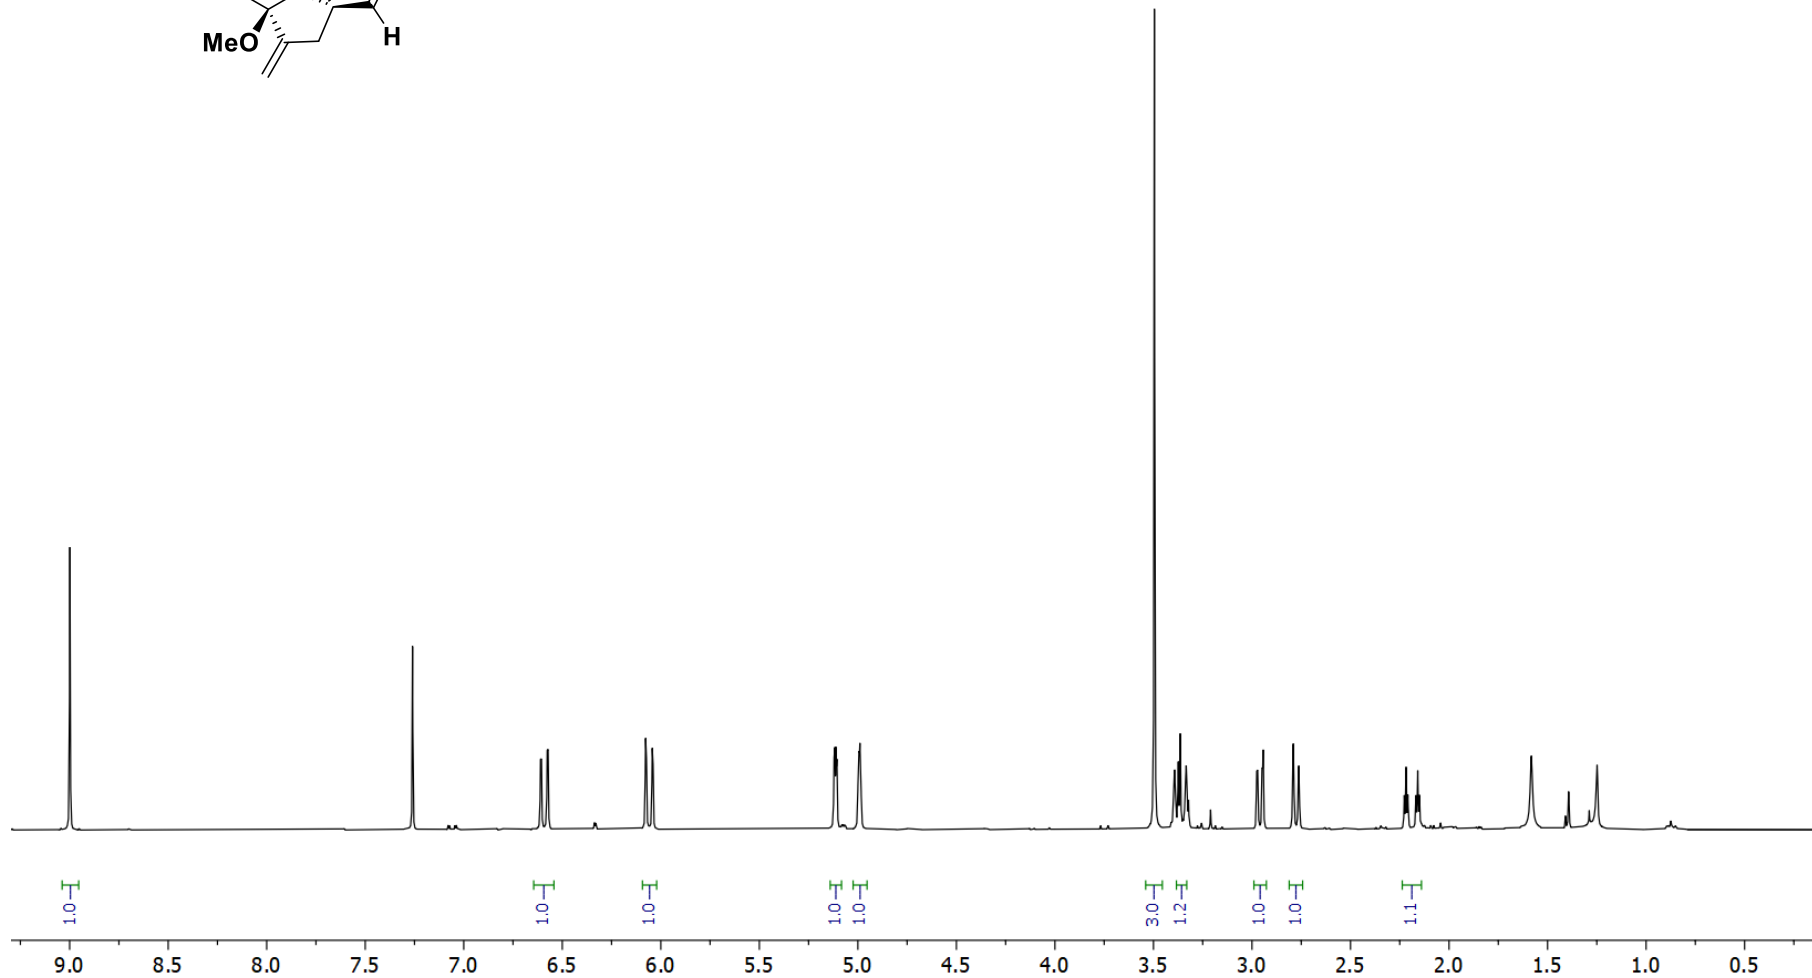

75 MHz, CDCl<sub>3</sub>

— 195.83 — 155.35 — 128.14 — 108.68 — 81.57 — 53.73 — 45.42 — 38.90 — 35.33 — 25.75

4j

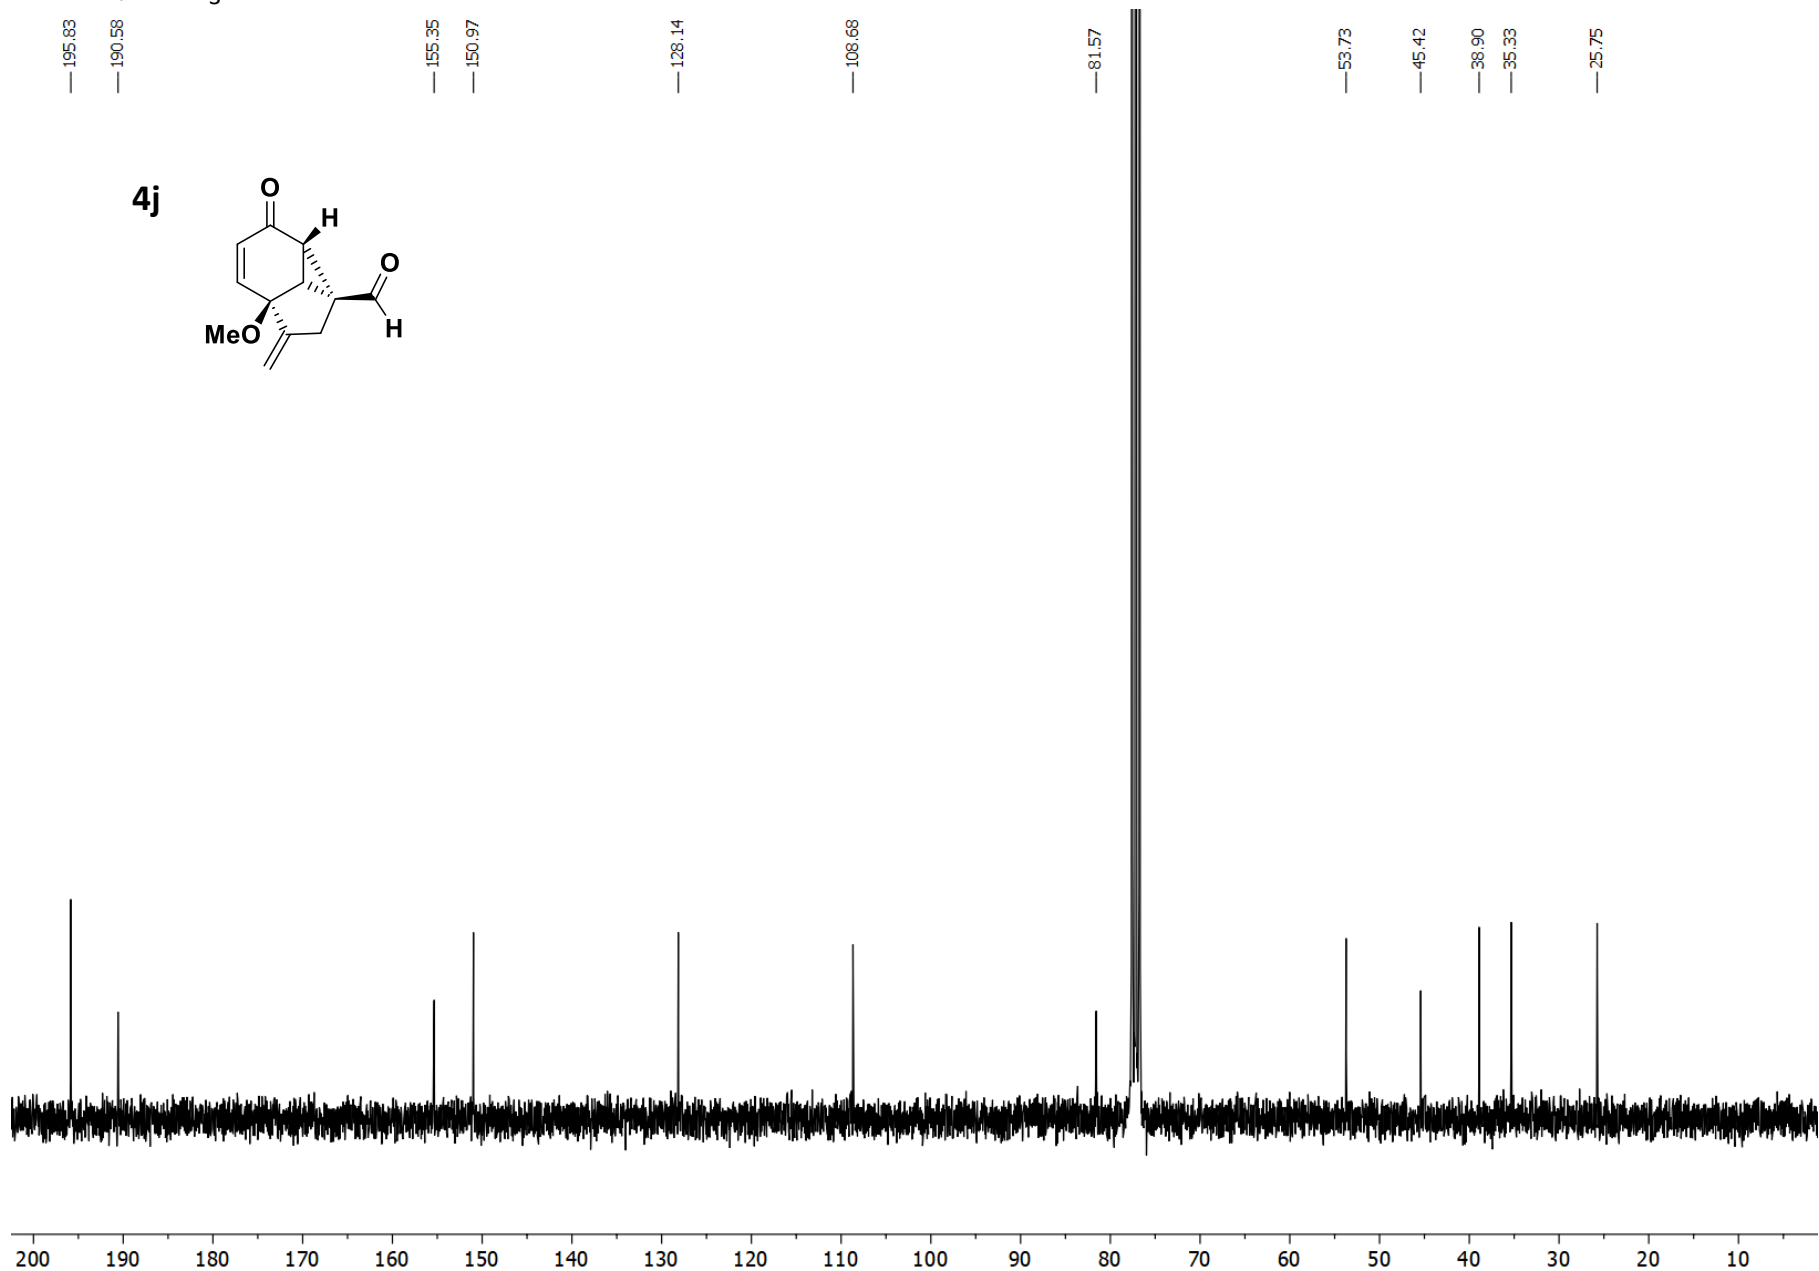



75 MHz, CDCl<sub>3</sub>

—195.75

—189.45

—149.29

—130.46

—83.99

—51.88

—44.96

—44.35

—38.01

—30.68

—28.79

—16.78

**4k**

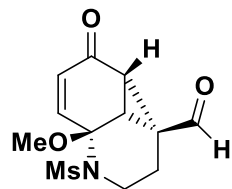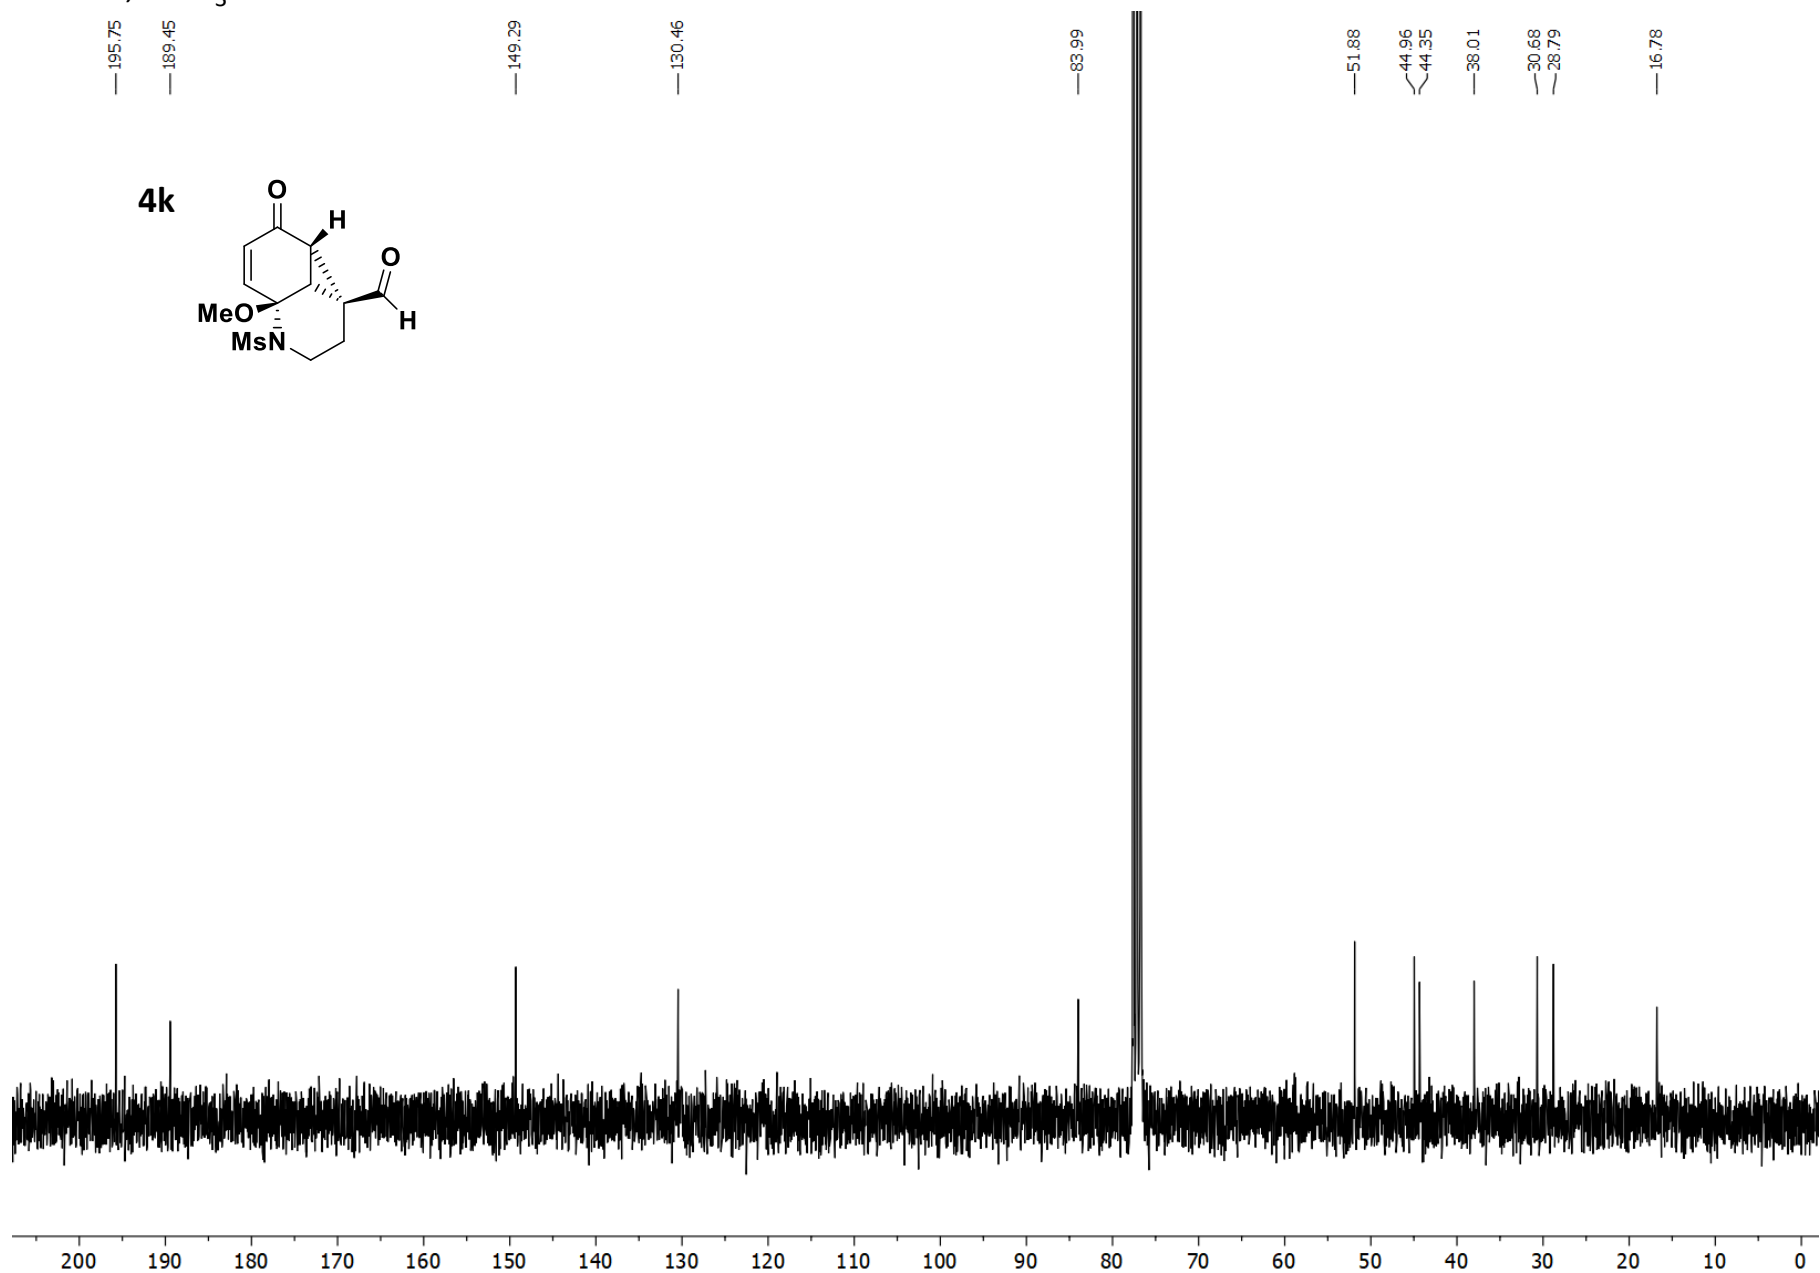

300 MHz, CDCl<sub>3</sub>

8.84

6.44  
6.44  
6.41  
6.40  
6.16  
6.15  
6.12  
6.12

3.76  
3.75  
3.72  
3.71  
3.70  
3.67  
3.65  
3.63  
3.62  
3.61  
3.61  
3.60  
3.59  
3.57  
2.78  
2.76  
2.75  
2.74  
2.73  
2.73  
2.71  
2.70  
2.69  
2.45  
2.44  
2.42  
2.41  
2.12  
2.11  
2.09  
2.09  
1.88  
1.87  
1.85  
1.84  
1.84  
1.82  
1.63  
1.60  
1.58  
1.55  
1.01  
1.01  
0.99

4m

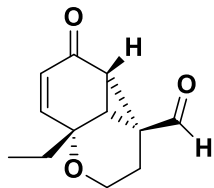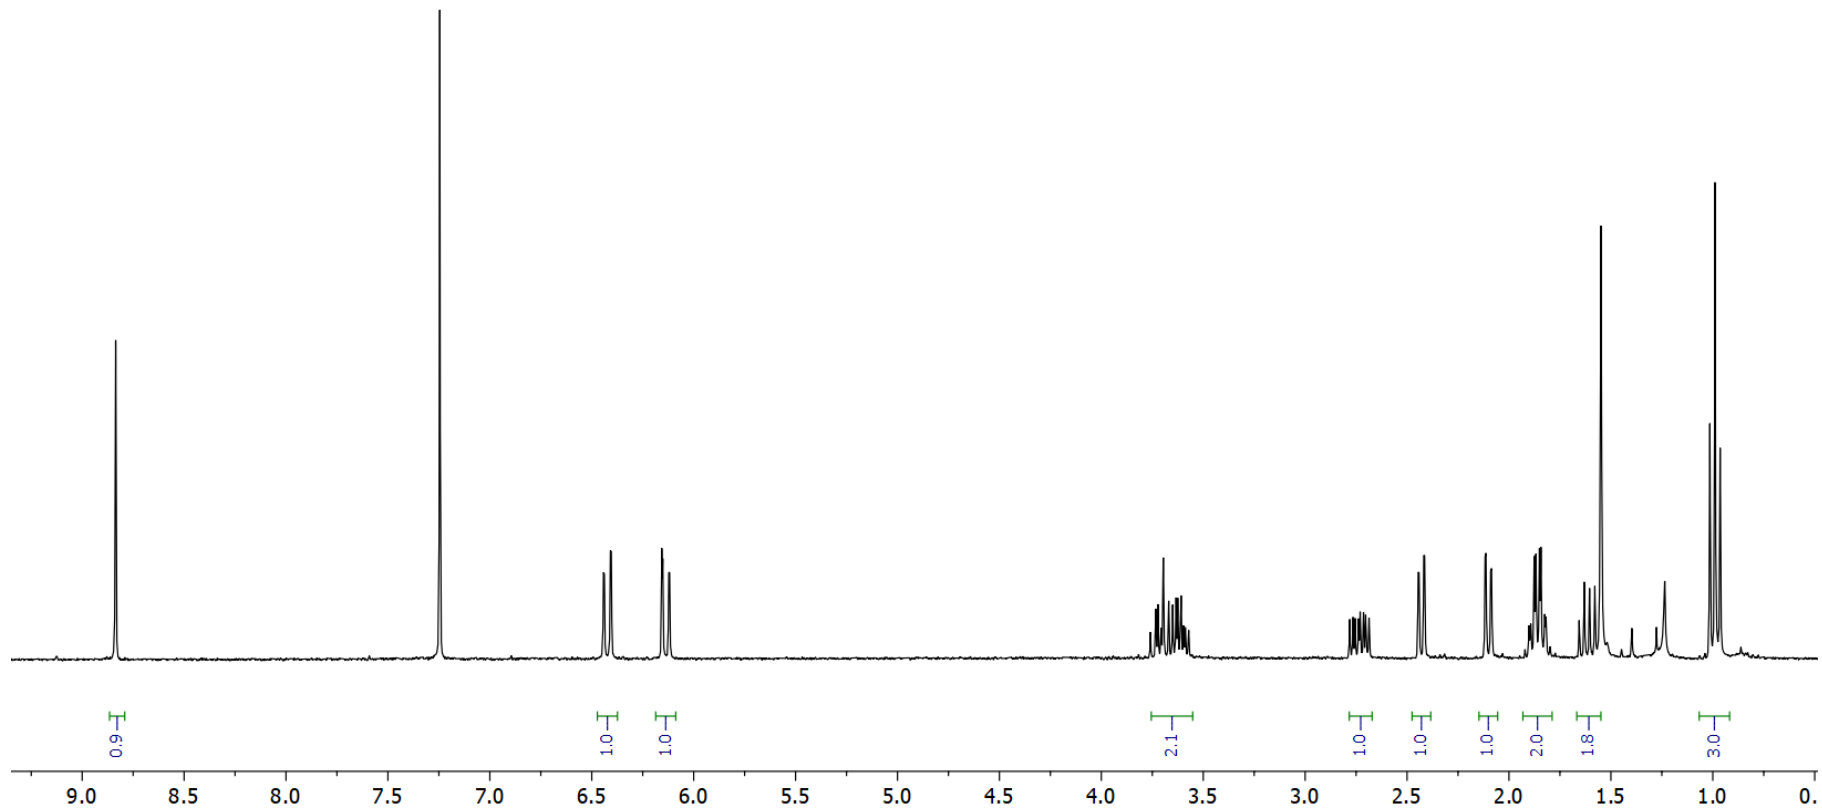

75 MHz, CDCl<sub>3</sub>

—197.41

—191.86

—151.36

—130.89

—68.51

—58.98

—34.76

—31.11

—30.28

—26.12

—14.75

—7.33

**4m**

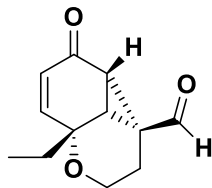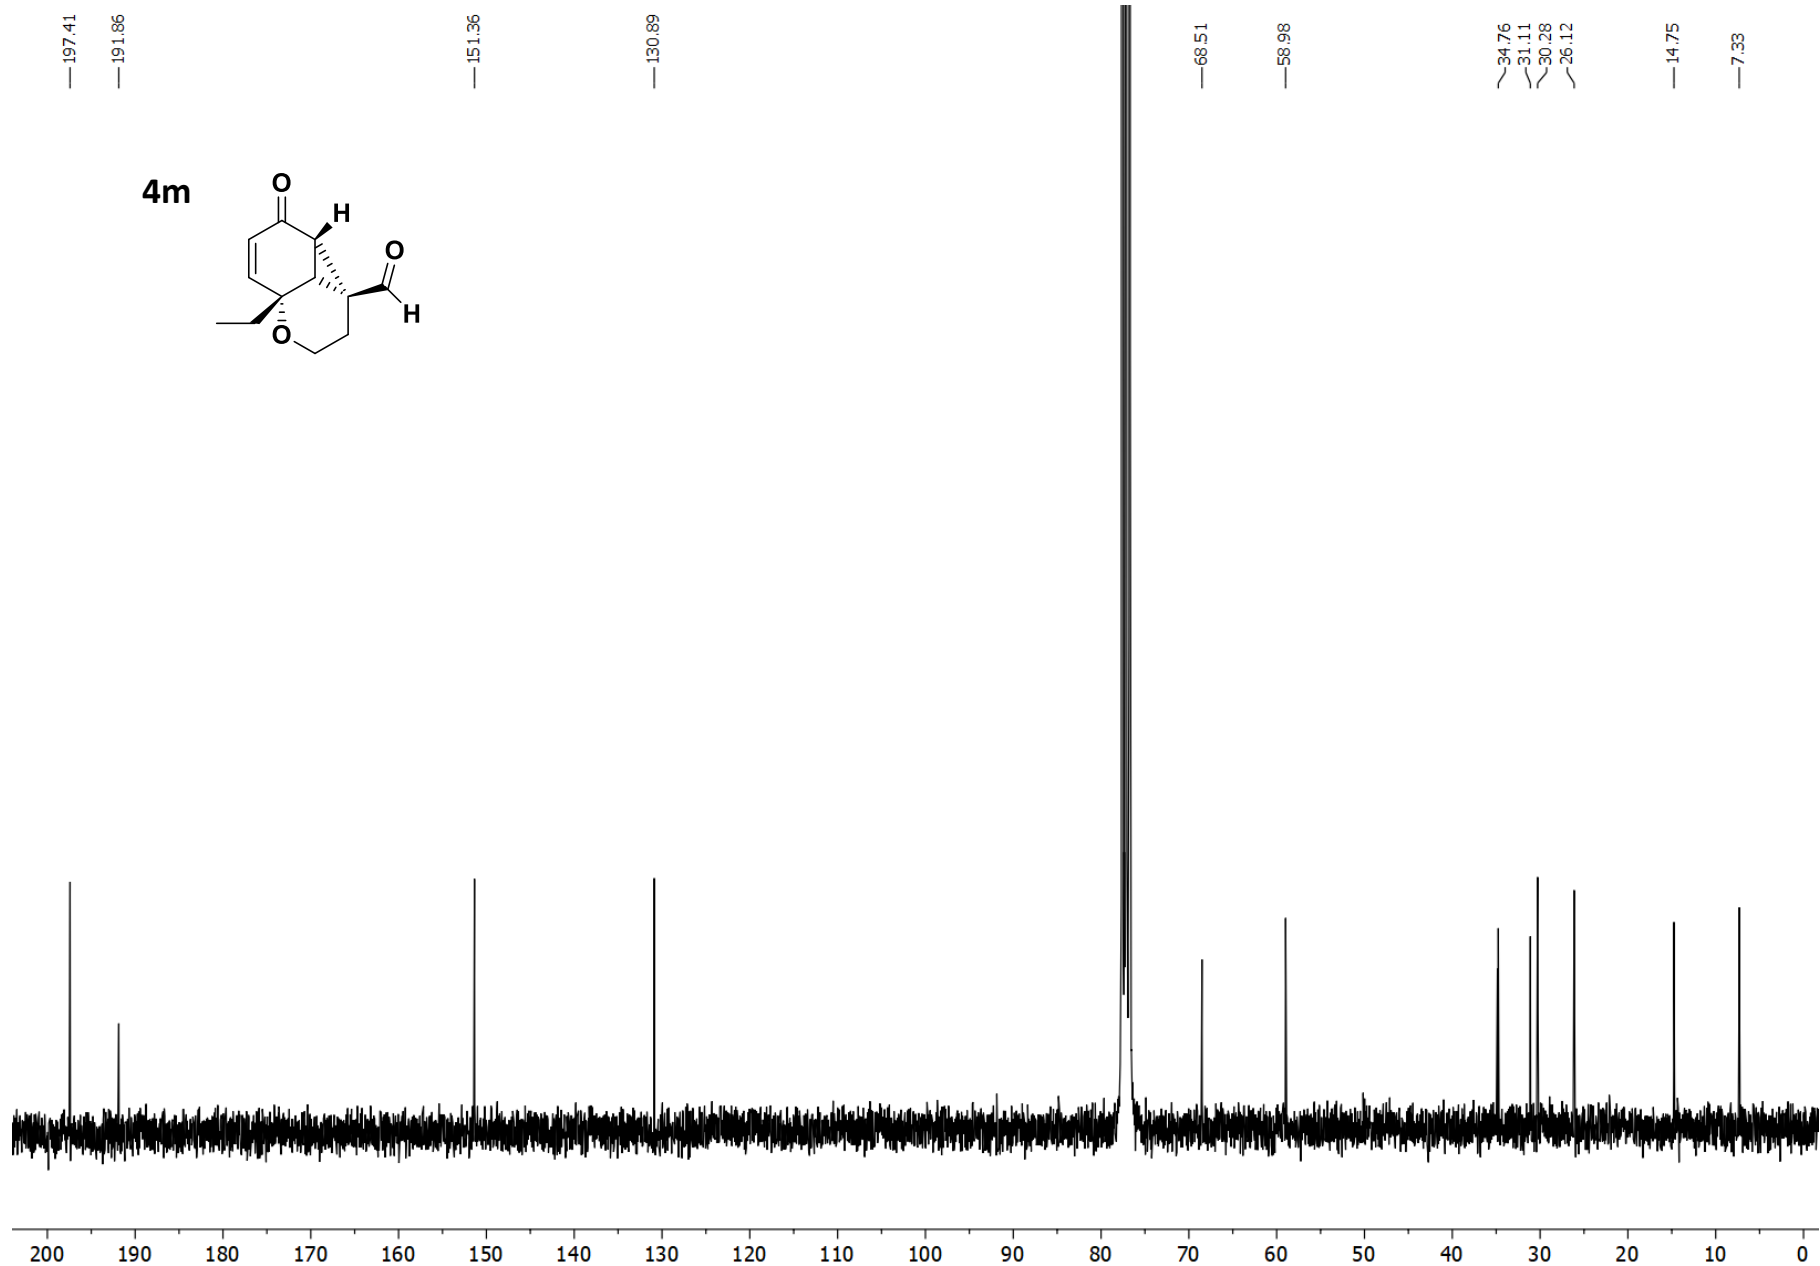

300 MHz, CDCl<sub>3</sub>

8.78  
7.52  
7.51  
7.50  
7.49  
7.48  
7.45  
7.44  
7.43  
7.43  
7.42  
7.40  
7.40  
7.39  
7.37  
7.36  
7.36  
7.35  
7.34  
7.33  
7.32  
6.55  
6.54  
6.51  
6.51  
6.31  
6.20  
6.17  
6.17

4.01  
3.96  
3.97  
3.95  
3.94  
3.92  
3.90  
3.89  
3.88  
3.87  
3.86  
3.85  
3.84  
3.82  
2.92  
2.91  
2.90  
2.88  
2.87  
2.86  
2.85  
2.83  
2.60  
2.60  
2.58  
2.57  
2.42  
2.42  
2.40  
2.39  
1.79  
1.77  
1.74  
1.72  
1.69

4n

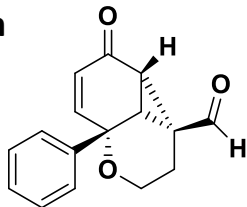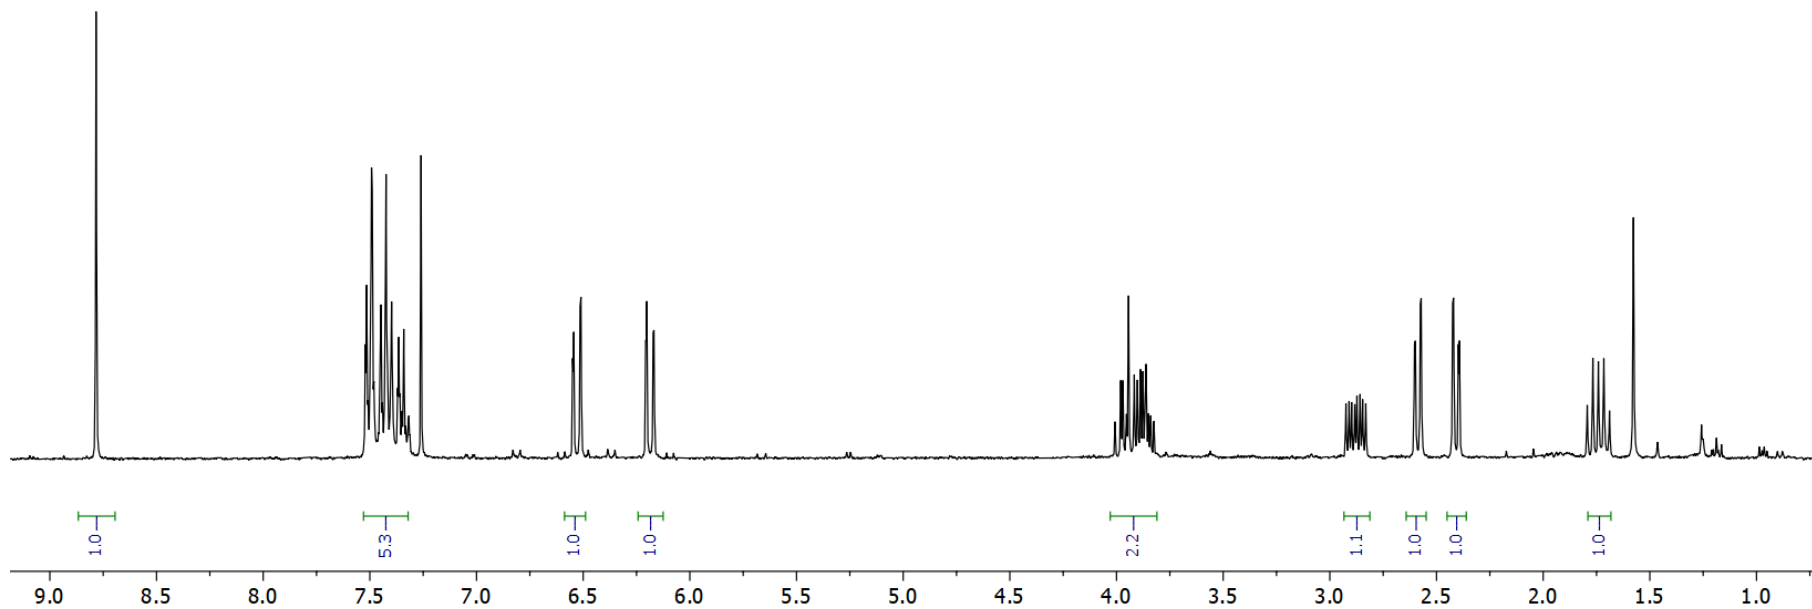

75 MHz, CDCl<sub>3</sub>

— 196.76

— 191.52

— 151.22

— 144.07

— 129.04

— 128.91

— 128.38

— 124.97

— 69.21

— 59.51

— 35.62

— 30.04

— 28.94

— 14.45

**4n**

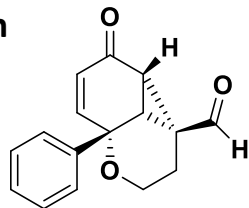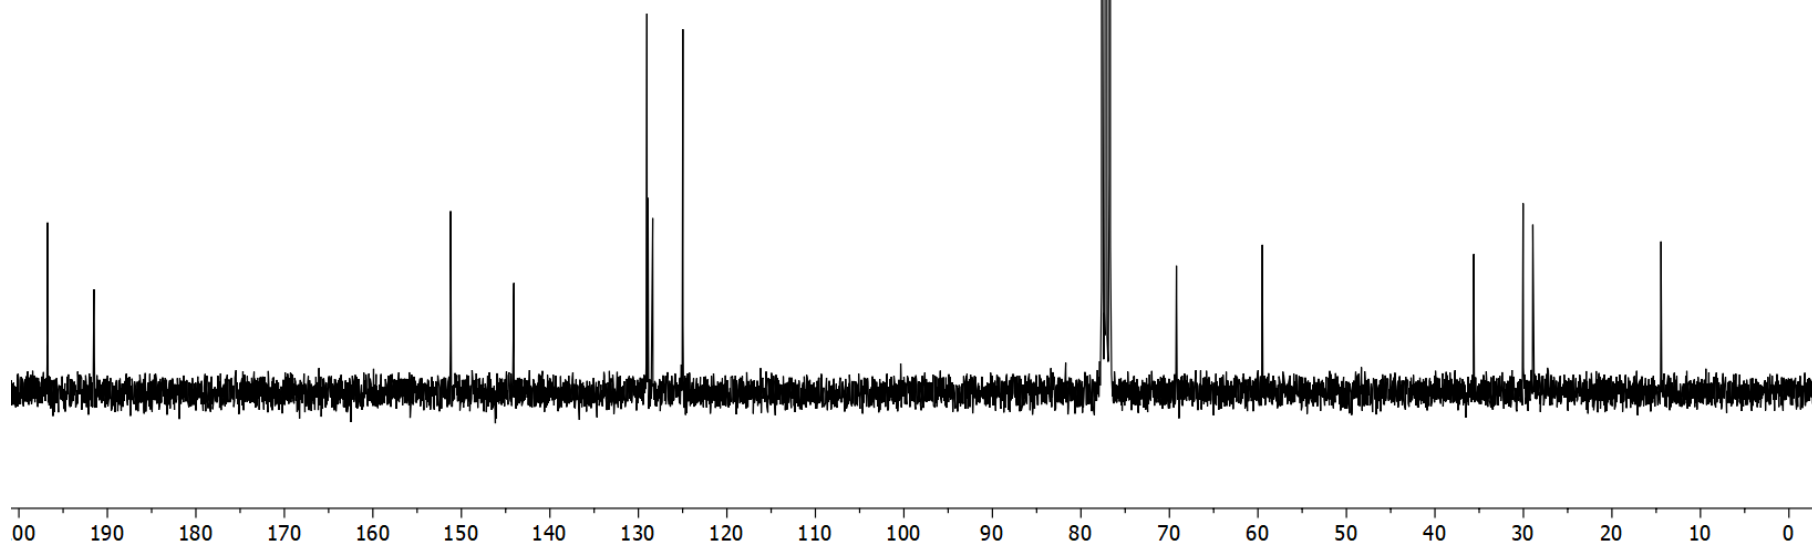

300 MHz, CDCl<sub>3</sub>

9.04

7.22  
7.21

3.48  
2.97  
2.97  
2.94  
2.94  
2.91  
2.91  
2.89  
2.88  
2.80  
2.77  
2.75  
2.72  
2.61  
2.59  
2.57  
2.54  
2.53  
2.50  
2.09  
2.08  
2.07  
2.04  
2.04  
2.02  
1.45  
1.43  
1.41  
1.40  
1.39  
1.38  
1.36  
1.34

7

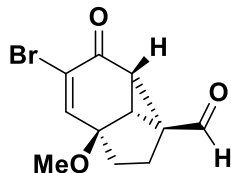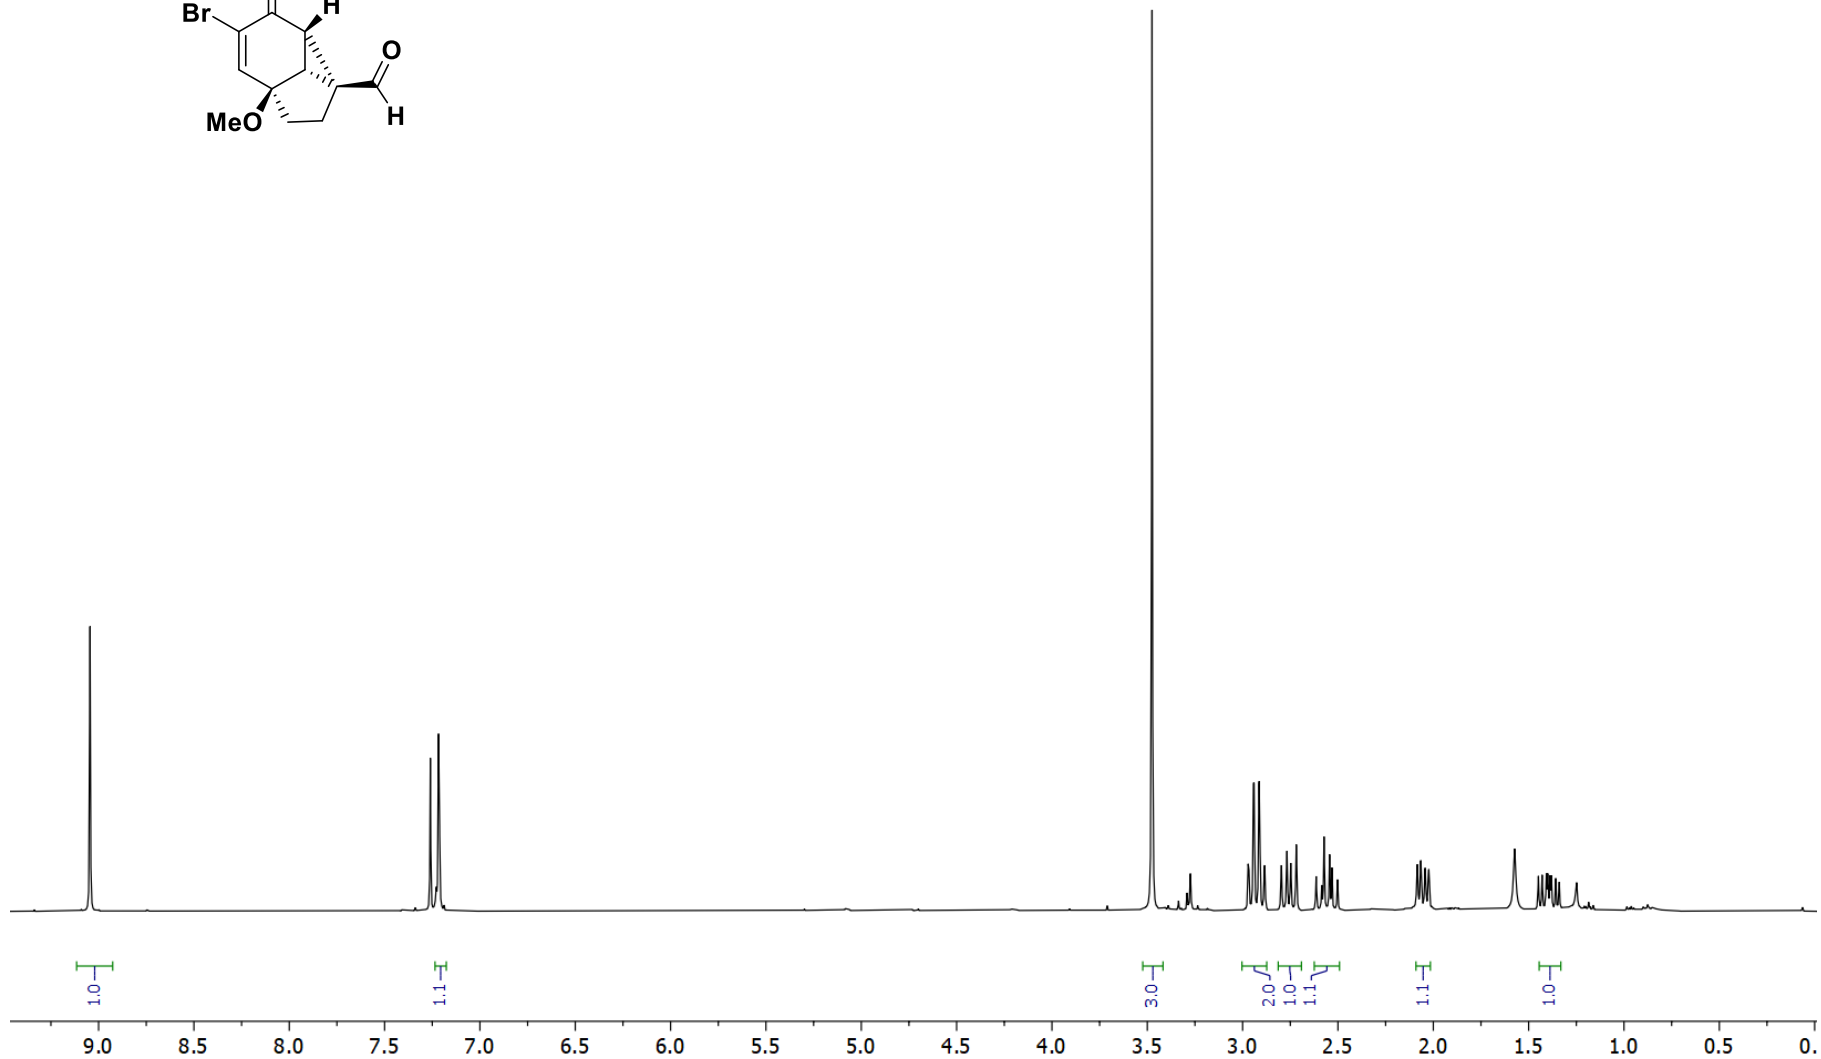

75 MHz, CDCl<sub>3</sub>

—195.63

—184.01

—152.03

—123.88

—84.78

77.58

77.16

76.74

—55.33

49.86

49.12

—41.40

—37.05

—19.05

7

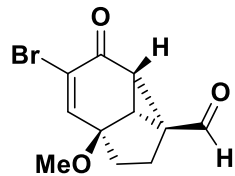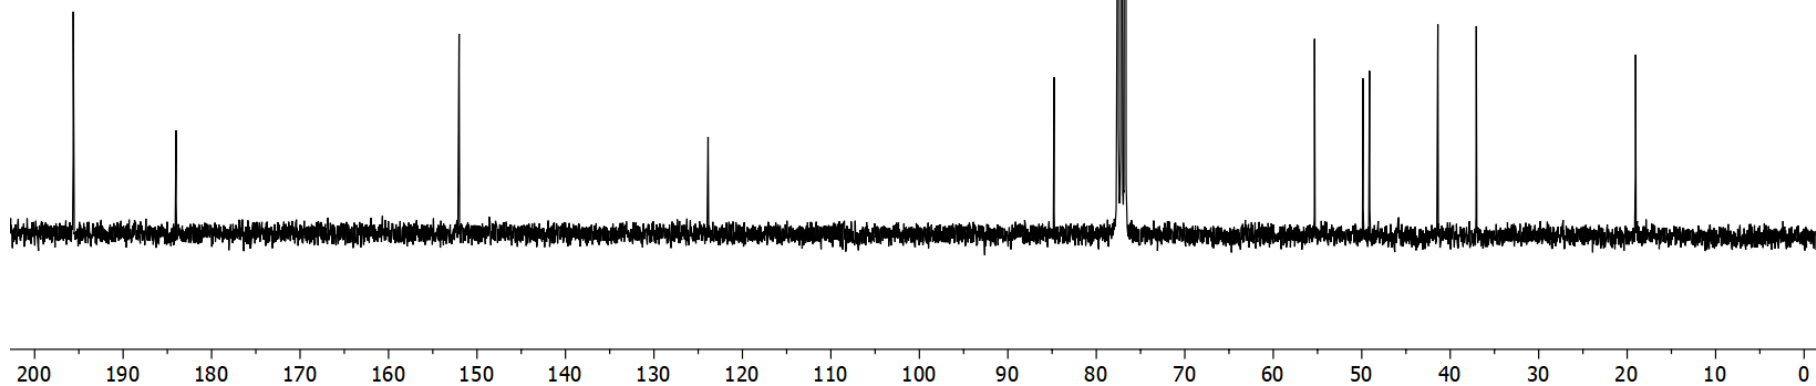

300 MHz, CDCl<sub>3</sub>

6.79  
6.78  
6.75  
6.75

6.18  
6.18  
6.15  
6.15

3.42  
2.90  
2.88  
2.87  
2.87  
2.85  
2.84  
2.84  
2.83  
2.63  
2.63  
2.62  
2.61  
2.60  
2.60  
2.59  
2.57  
2.56  
2.55  
2.54  
2.51  
2.50  
2.47  
1.93  
1.92  
1.89  
1.88  
1.57  
1.56  
1.53  
1.52  
1.51  
1.50  
1.49  
1.45  
1.11  
1.08

14

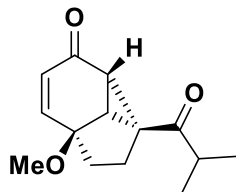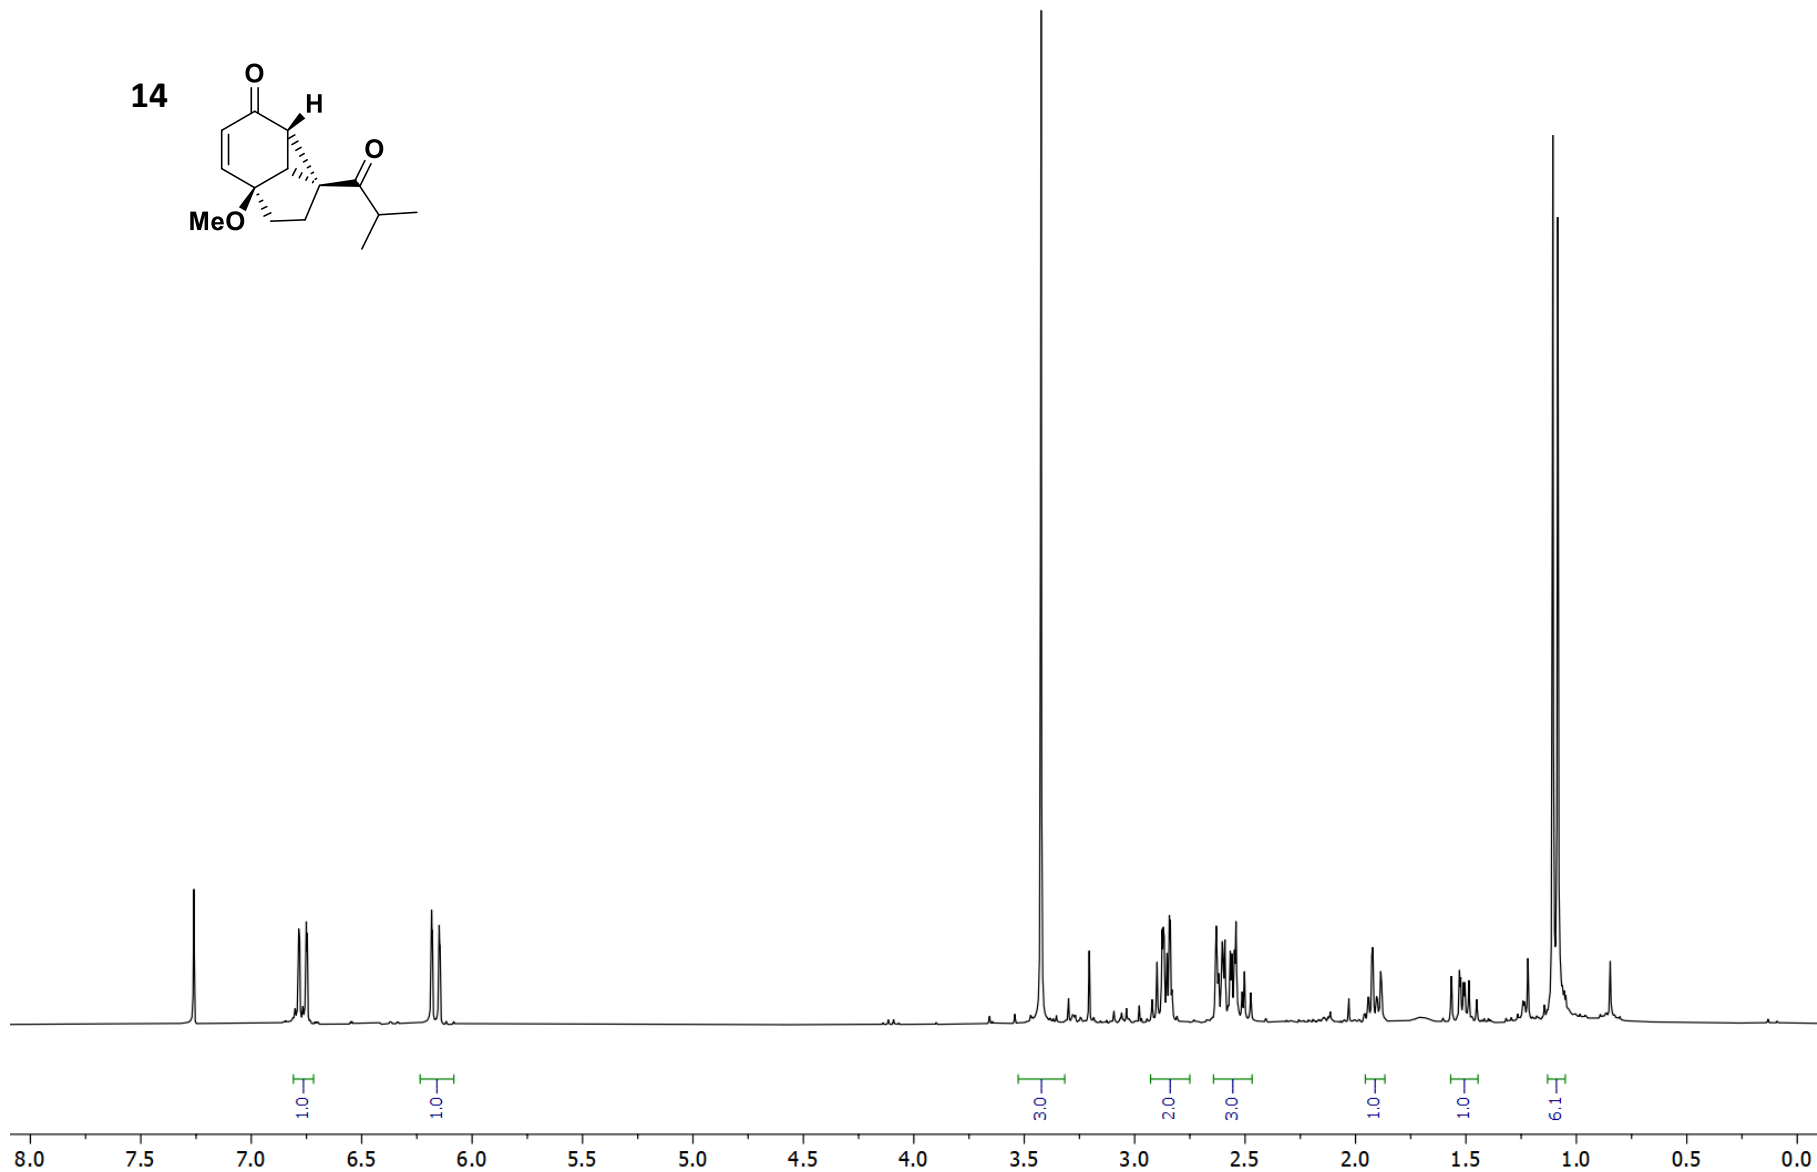

300 MHz, CDCl<sub>3</sub>

— 210.38

— 192.34

— 151.57

— 130.89

82.14

77.58

77.16

76.74

— 54.91

— 49.12

— 47.30

— 42.07

— 39.20

— 36.45

— 21.64

— 18.96

— 18.66

14

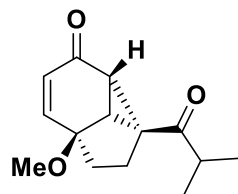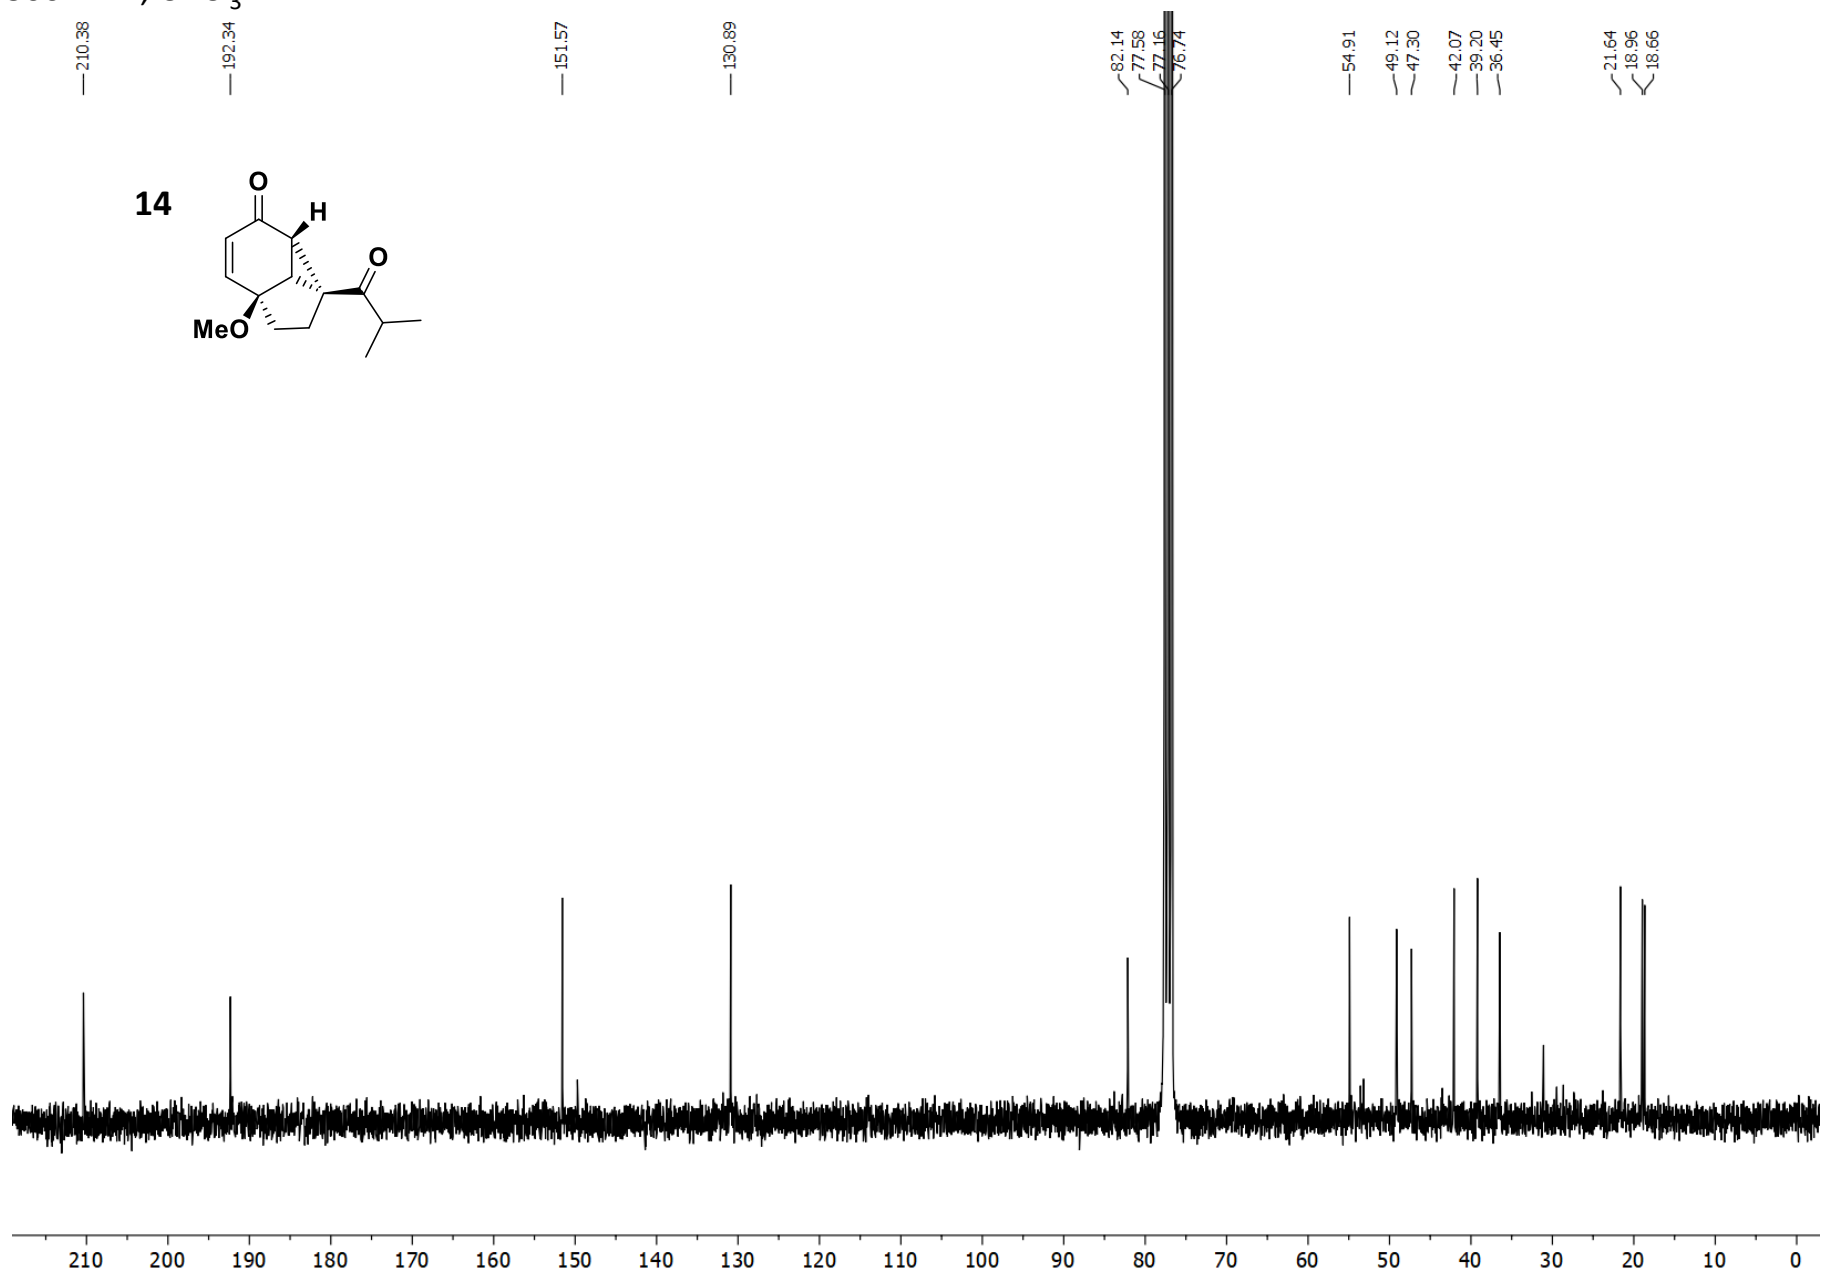

300 MHz, CDCl<sub>3</sub>

5.93  
5.93  
5.90  
5.89  
5.73  
5.70

3.65  
3.62  
3.26  
3.08  
3.07  
3.05  
3.04  
3.03  
3.01  
3.00

2.24  
2.23  
2.21  
2.20  
2.17  
2.16  
1.90  
1.89  
1.88  
1.87  
1.85  
1.81  
1.80  
1.79  
1.77  
1.32  
1.26  
1.25  
1.24  
1.21  
1.20  
1.19  
1.18  
1.13  
1.00  
-0.99  
-0.97  
-0.96  
-0.95  
-0.90  
-0.88  
-0.86  
0.71

18

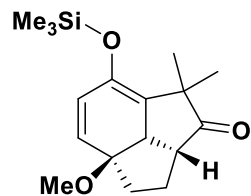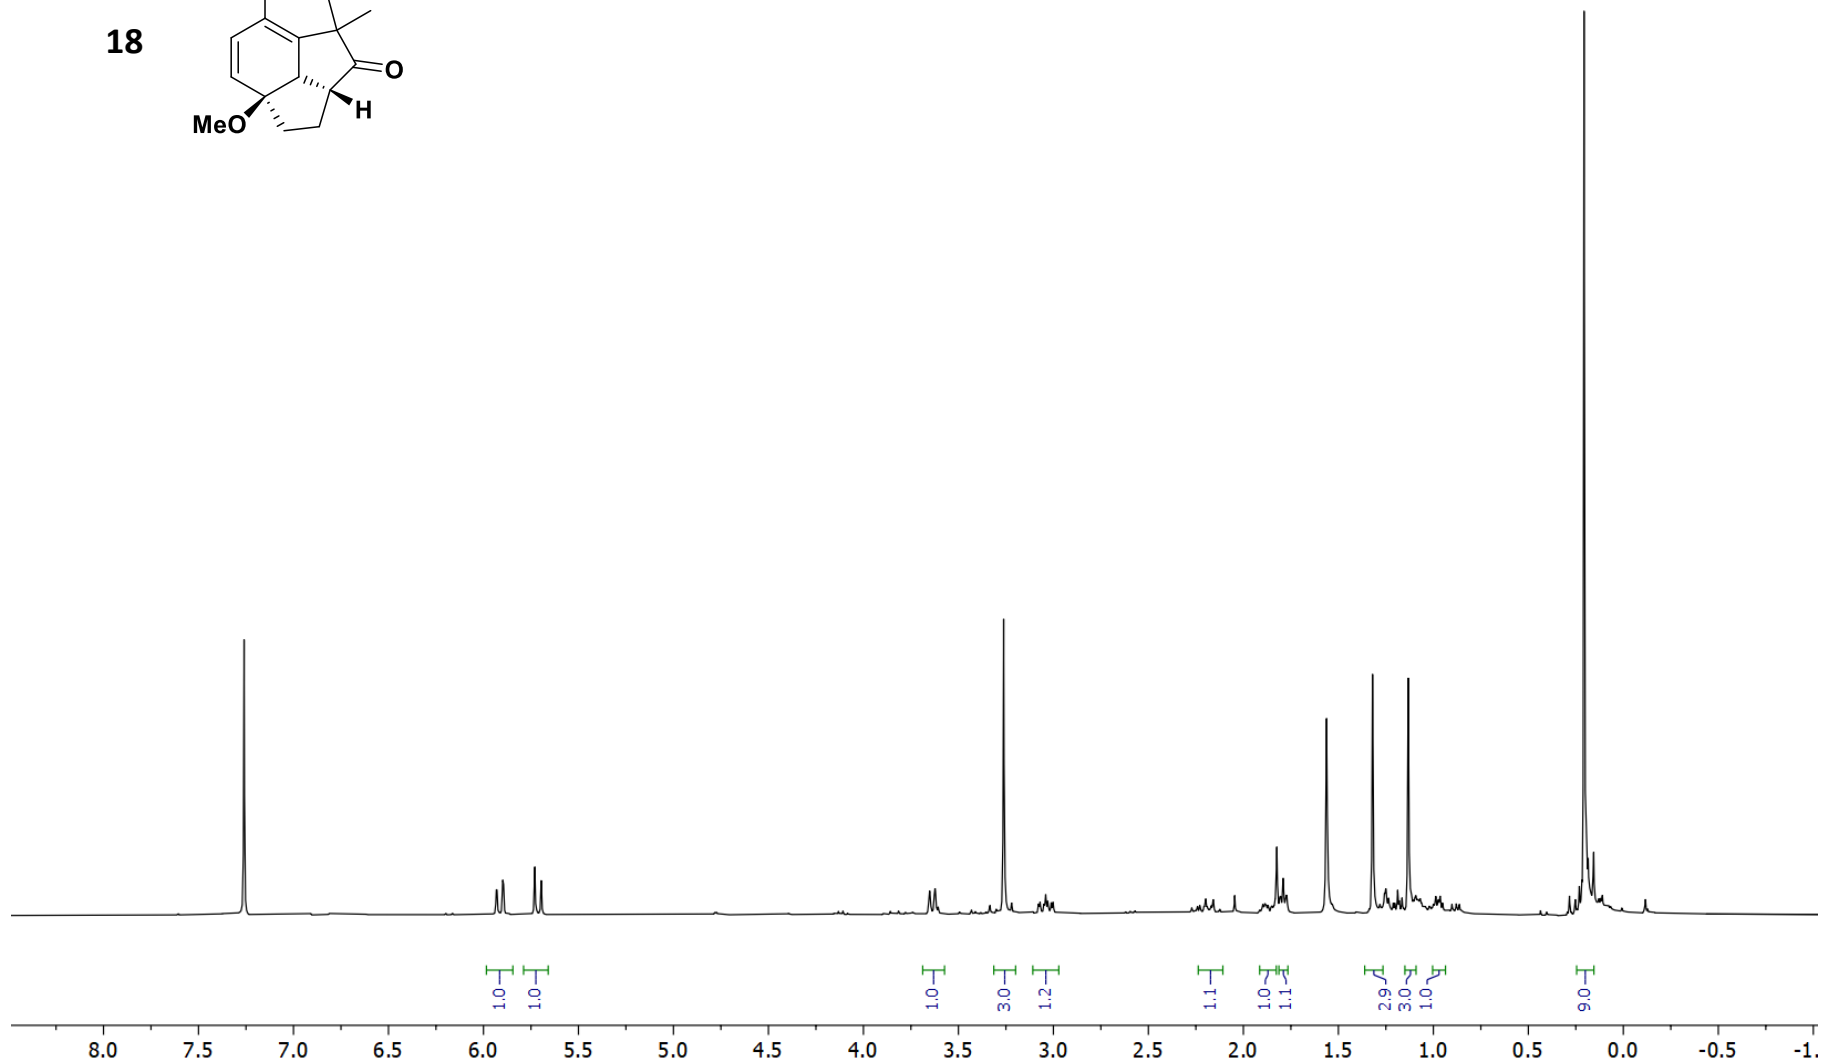

150 MHz, CDCl<sub>3</sub>

— 223.93

— 140.74

— 131.39

— 126.77

— 122.26

— 88.62

— 51.43

— 50.87

— 50.14

— 46.51

— 35.11

— 29.28

— 23.96

— 21.73

— 0.97

18

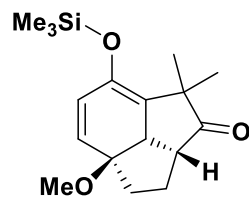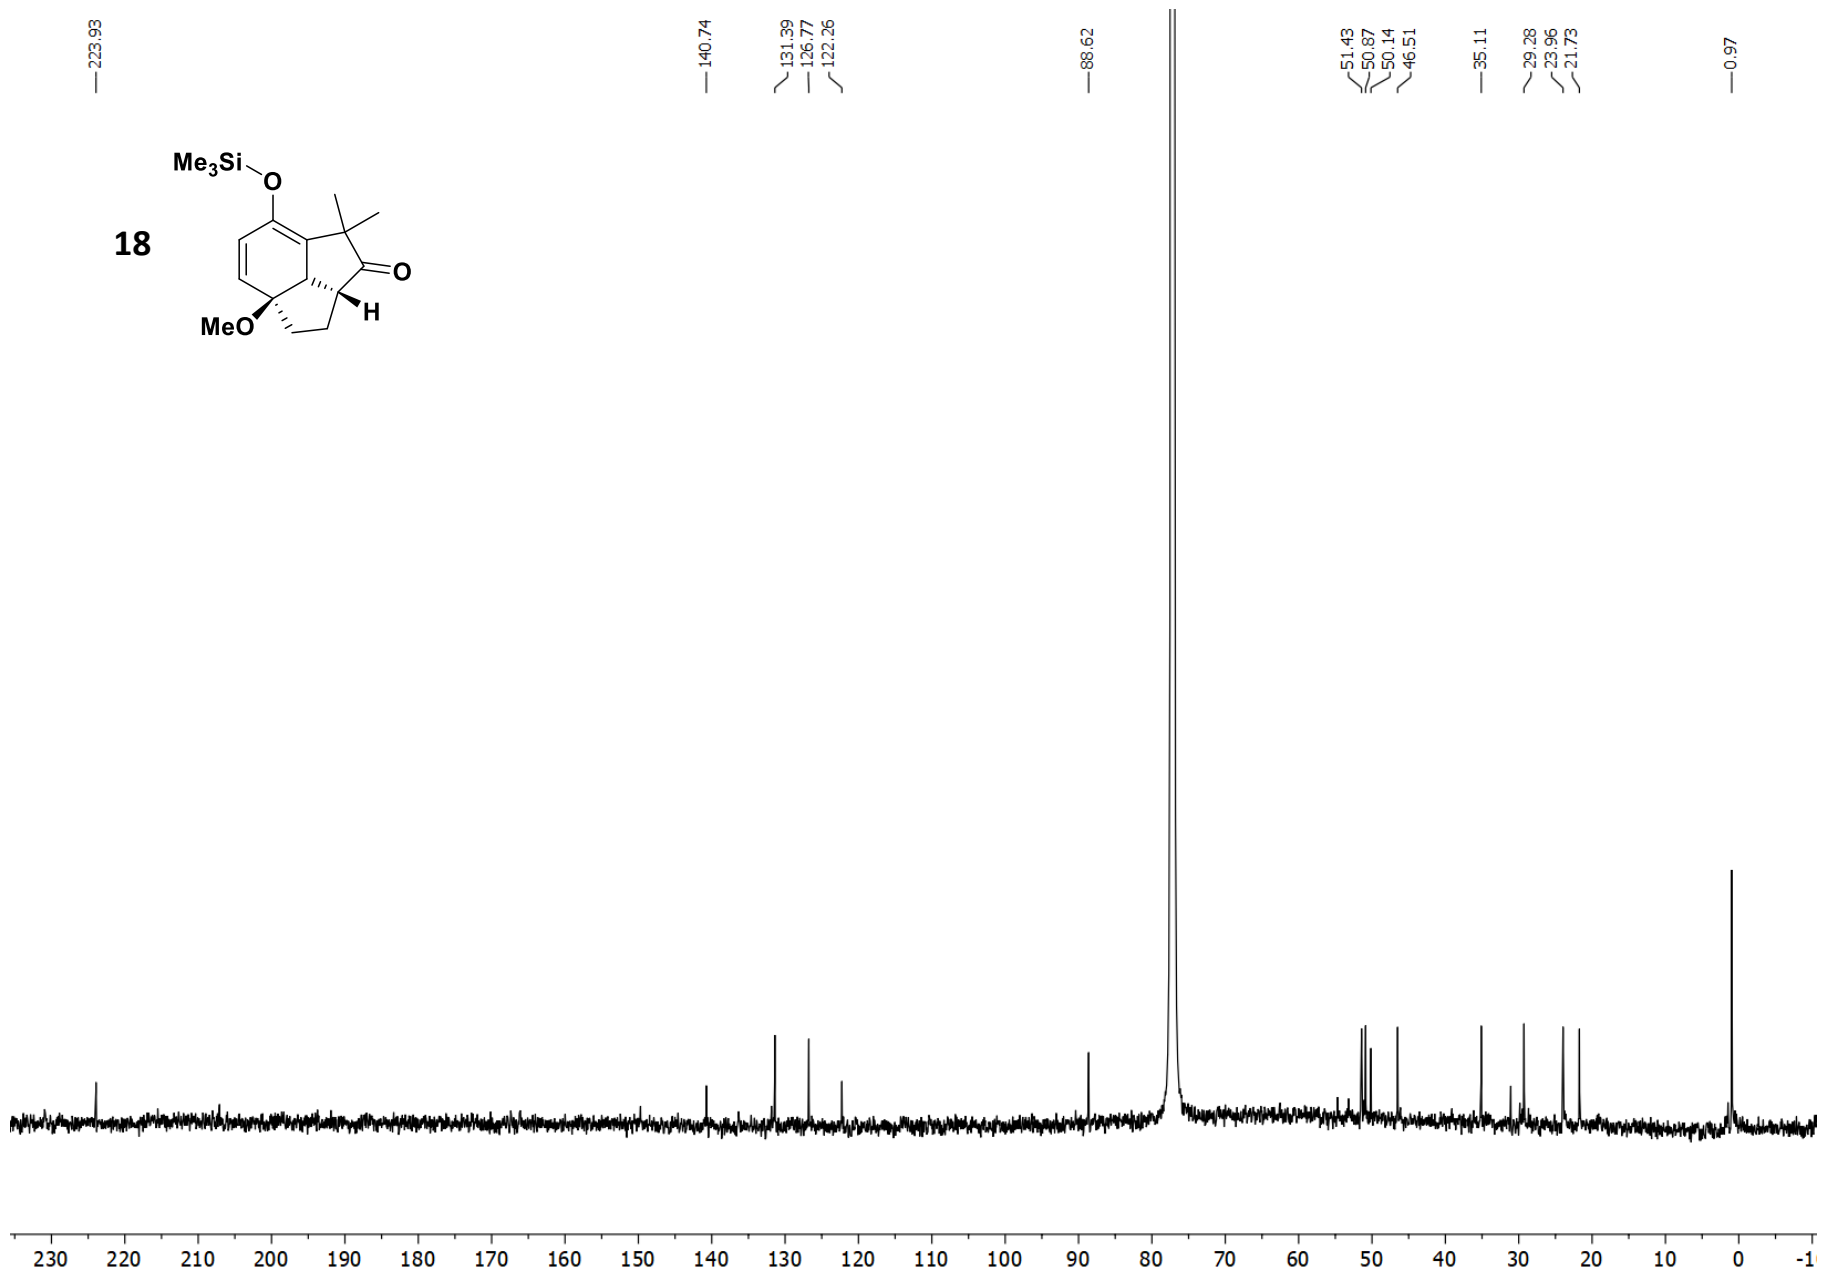

## V. SFC Data

4a

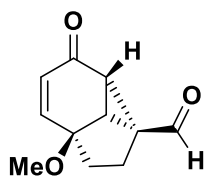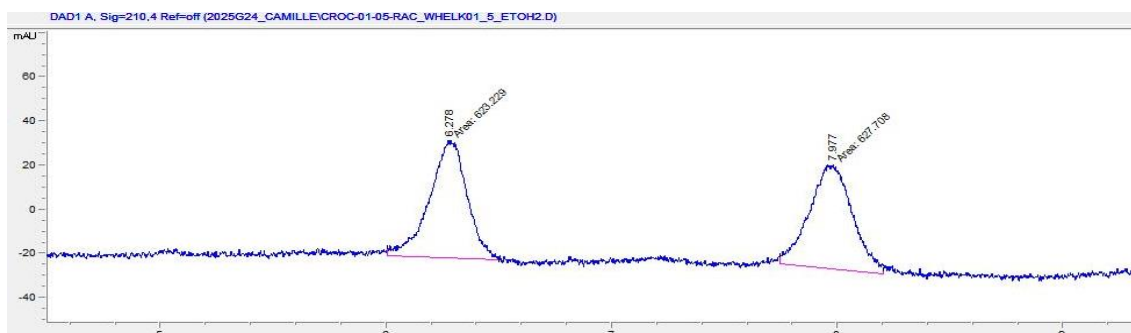

| Peak # | RetTime [min] | Type | Width [min] | Area [mAU*s] | Height [mAU] | Area %  |
|--------|---------------|------|-------------|--------------|--------------|---------|
| 1      | 6.278         | MM   | 0.1939      | 623.22888    | 53.56251     | 49.8210 |
| 2      | 7.977         | MM   | 0.2210      | 627.70813    | 47.34914     | 50.1790 |

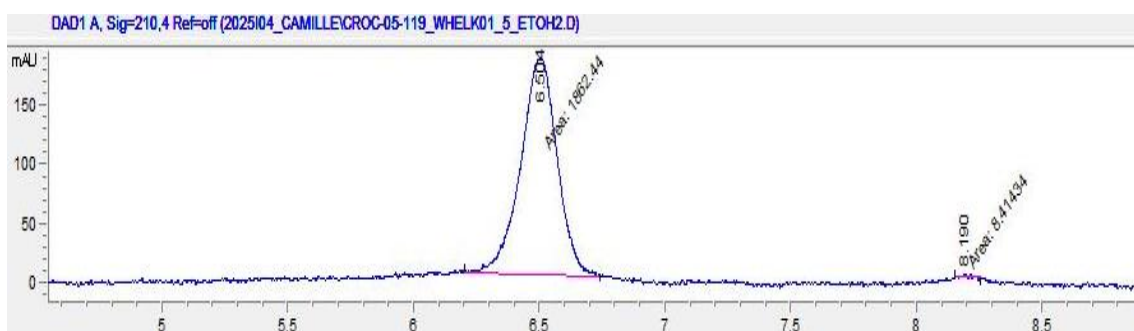

| Peak # | RetTime [min] | Type | Width [min] | Area [mAU*s] | Height [mAU] | Area %  |
|--------|---------------|------|-------------|--------------|--------------|---------|
| 1      | 6.504         | MM   | 0.1690      | 1862.43933   | 183.69395    | 99.5502 |
| 2      | 8.190         | MM   | 0.0391      | 8.41434      | 3.58861      | 0.4498  |

4b

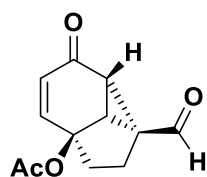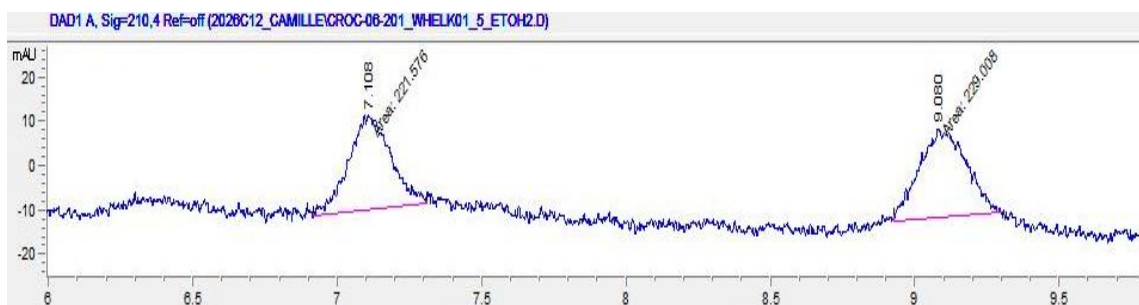

| Peak # | RetTime [min] | Type | Width [min] | Area [mAU*s] | Height [mAU] | Area %  |
|--------|---------------|------|-------------|--------------|--------------|---------|
| 1      | 7.108         | MM   | 0.1733      | 221.57628    | 21.30997     | 49.1753 |
| 2      | 9.080         | MM   | 0.1892      | 229.00830    | 20.17492     | 50.8247 |

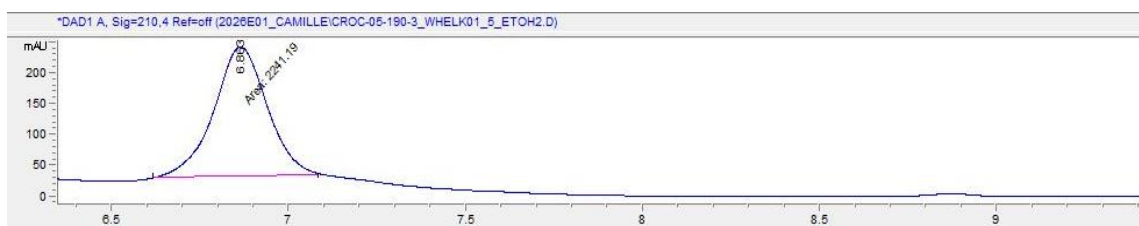

| Peak # | RetTime [min] | Type | Width [min] | Area [mAU*s] | Height [mAU] | Area %   |
|--------|---------------|------|-------------|--------------|--------------|----------|
| 1      | 6.863         | MM   | 0.1769      | 2241.18677   | 211.20183    | 100.0000 |

4c

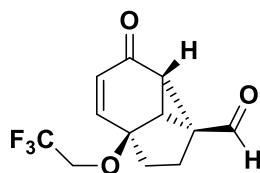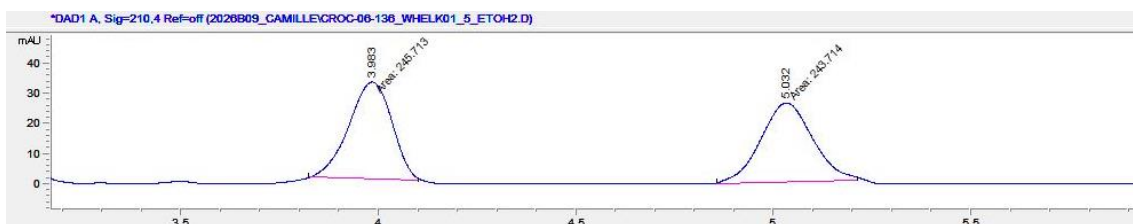

| Peak # | RetTime [min] | Type | Width [min] | Area [mAU*s] | Height [mAU] | Area %  |
|--------|---------------|------|-------------|--------------|--------------|---------|
| 1      | 3.983         | MM   | 0.1269      | 245.71318    | 32.25959     | 50.2043 |
| 2      | 5.032         | MM   | 0.1538      | 243.71353    | 26.40890     | 49.7957 |

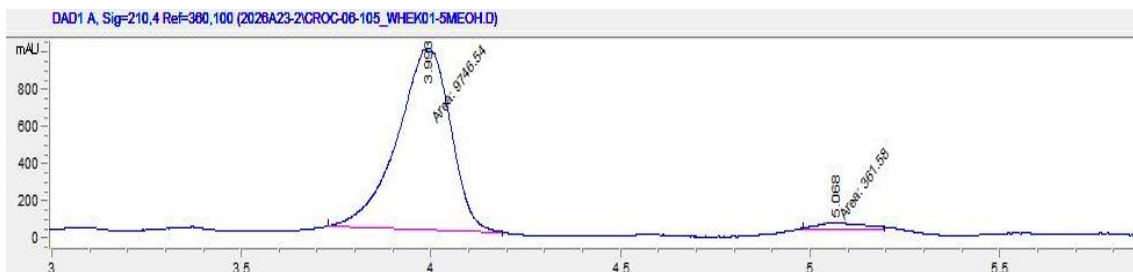

| Peak # | RetTime [min] | Type | Width [min] | Area [mAU*s] | Height [mAU] | Area %  |
|--------|---------------|------|-------------|--------------|--------------|---------|
| 1      | 3.993         | MM   | 0.1649      | 9746.53613   | 985.09729    | 96.4229 |
| 2      | 5.068         | MM   | 0.1524      | 361.57983    | 39.53909     | 3.5771  |

4d

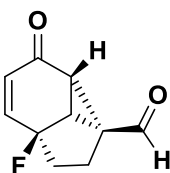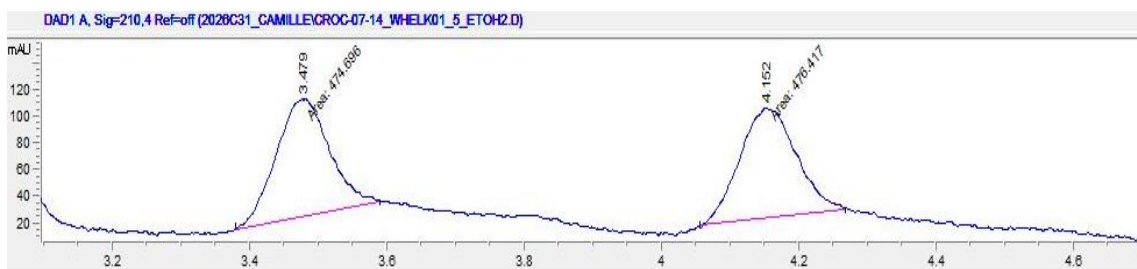

| Peak # | RetTime [min] | Type | Width [min] | Area [mAU*s] | Height [mAU] | Area %  |
|--------|---------------|------|-------------|--------------|--------------|---------|
| 1      | 3.479         | MM   | 0.0902      | 474.69595    | 87.67290     | 49.9095 |
| 2      | 4.152         | MM   | 0.0963      | 476.41663    | 82.48325     | 50.0905 |

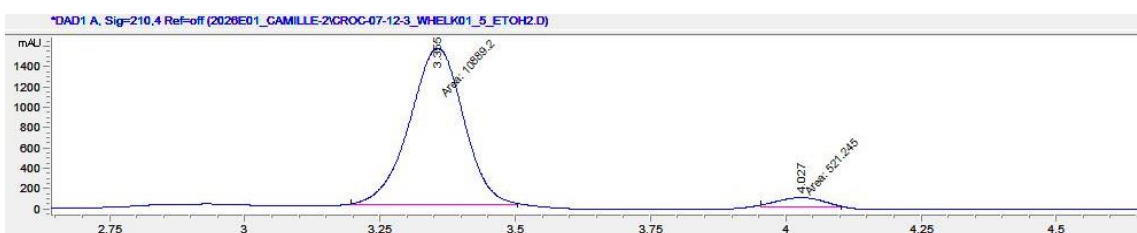

| Peak # | RetTime [min] | Type | Width [min] | Area [mAU*s] | Height [mAU] | Area %  |
|--------|---------------|------|-------------|--------------|--------------|---------|
| 1      | 3.355         | MM   | 0.1167      | 1.08892e4    | 1554.89746   | 95.4319 |
| 2      | 4.027         | MM   | 0.0950      | 521.24524    | 91.43199     | 4.5681  |

4e

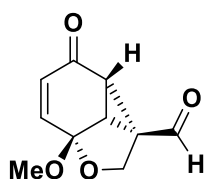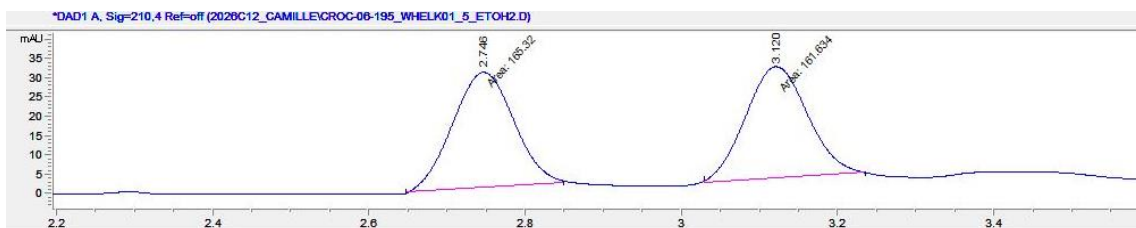

| Peak # | RetTime [min] | Type | Width [min] | Area [mAU*s] | Height [mAU] | Area %  |
|--------|---------------|------|-------------|--------------|--------------|---------|
| 1      | 2.746         | MM   | 0.0914      | 165.32037    | 30.15174     | 50.5638 |
| 2      | 3.120         | MM   | 0.0923      | 161.63367    | 29.18751     | 49.4362 |

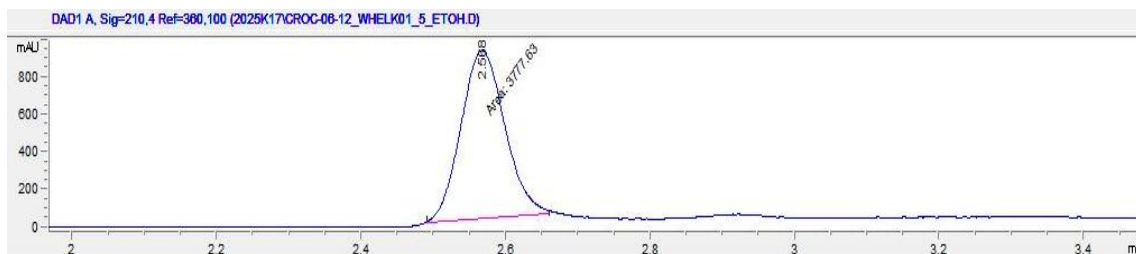

| Peak # | RetTime [min] | Type | Width [min] | Area [mAU*s] | Height [mAU] | Area %   |
|--------|---------------|------|-------------|--------------|--------------|----------|
| 1      | 2.568         | MM   | 0.0700      | 3777.62793   | 899.01526    | 100.0000 |

4f

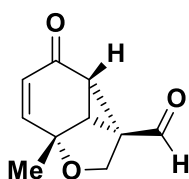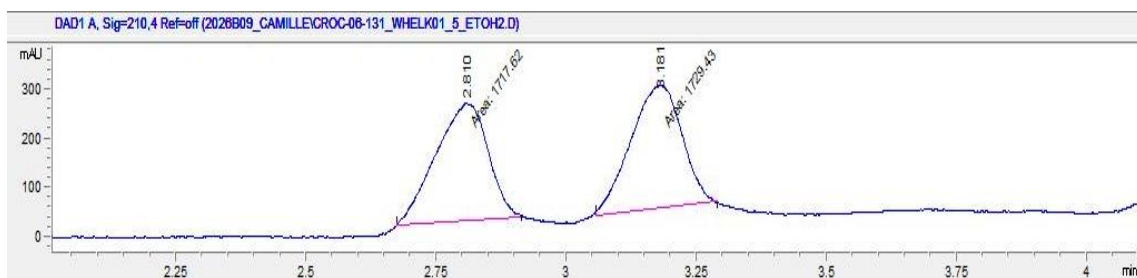

| Peak # | RetTime [min] | Type | Width [min] | Area [mAU*s] | Height [mAU] | Area %  |
|--------|---------------|------|-------------|--------------|--------------|---------|
| 1      | 2.810         | MM   | 0.1185      | 1717.62158   | 241.54477    | 49.8288 |
| 2      | 3.181         | MM   | 0.1143      | 1729.42566   | 252.27144    | 50.1712 |

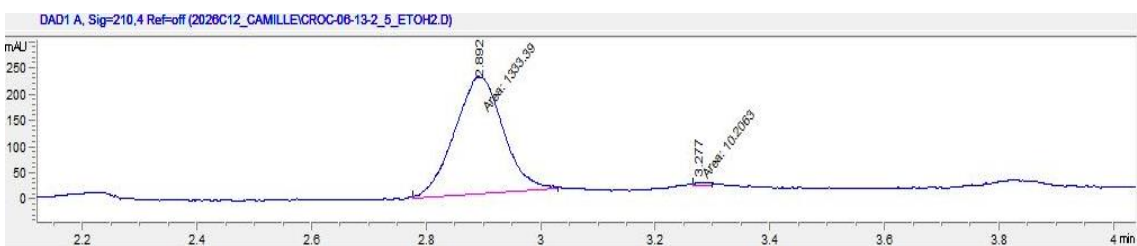

| Peak # | RetTime [min] | Type | Width [min] | Area [mAU*s] | Height [mAU] | Area %  |
|--------|---------------|------|-------------|--------------|--------------|---------|
| 1      | 2.892         | MM   | 0.0990      | 1333.38916   | 224.57745    | 99.2404 |
| 2      | 3.277         | MM   | 0.0268      | 10.20633     | 6.34251      | 0.7596  |

4g

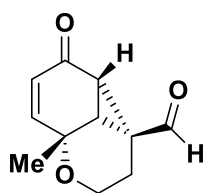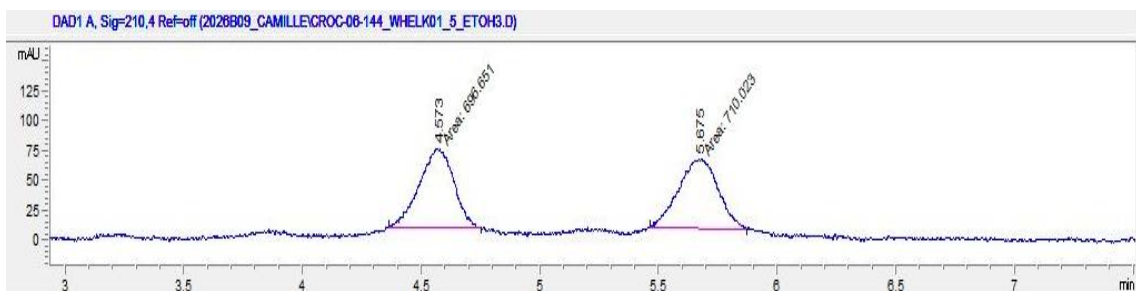

| Peak # | RetTime [min] | Type | Width [min] | Area [mAU*s] | Height [mAU] | Area %  |
|--------|---------------|------|-------------|--------------|--------------|---------|
| 1      | 4.573         | MM   | 0.1730      | 696.65051    | 67.13091     | 49.5247 |
| 2      | 5.675         | MM   | 0.2010      | 710.02289    | 58.86599     | 50.4753 |

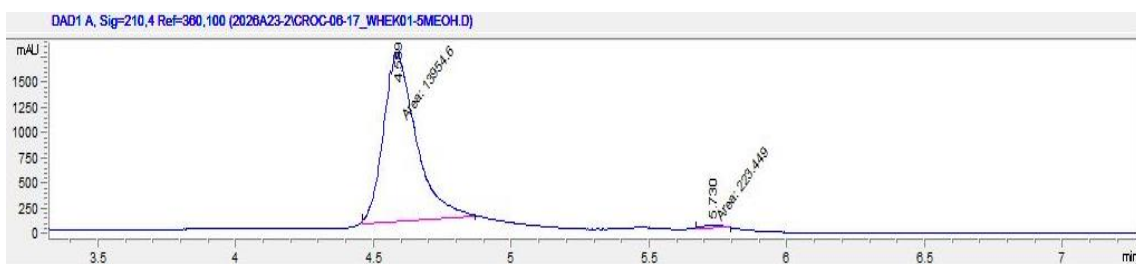

| Peak # | RetTime [min] | Type | Width [min] | Area [mAU*s] | Height [mAU] | Area %  |
|--------|---------------|------|-------------|--------------|--------------|---------|
| 1      | 4.589         | MM   | 0.1366      | 1.39546e4    | 1702.69104   | 98.4240 |
| 2      | 5.730         | MM   | 0.0901      | 223.44878    | 41.34848     | 1.5760  |

4h

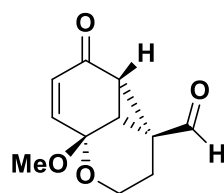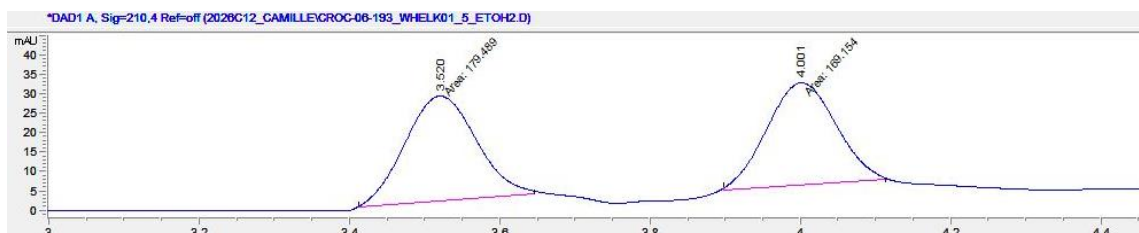

| Peak # | RetTime [min] | Type | Width [min] | Area [mAU*s] | Height [mAU] | Area %  |
|--------|---------------|------|-------------|--------------|--------------|---------|
| 1      | 3.520         | MM   | 0.1101      | 179.48927    | 27.16604     | 51.4822 |
| 2      | 4.001         | MM   | 0.1066      | 169.15430    | 26.45795     | 48.5178 |

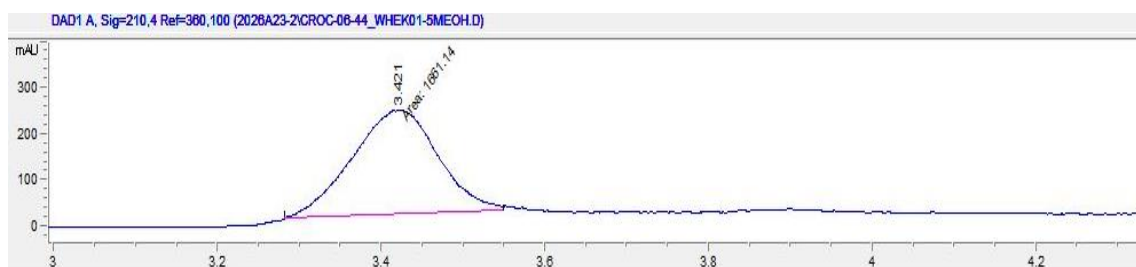

| Peak # | RetTime [min] | Type | Width [min] | Area [mAU*s] | Height [mAU] | Area %   |
|--------|---------------|------|-------------|--------------|--------------|----------|
| 1      | 3.421         | MM   | 0.1230      | 1661.13525   | 225.10950    | 100.0000 |

4i

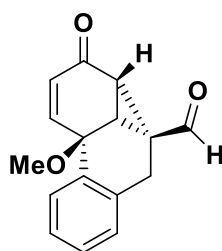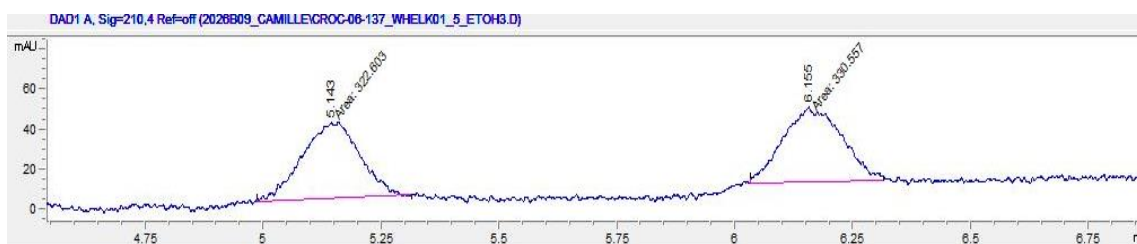

| Peak # | RetTime [min] | Type | Width [min] | Area [mAU*s] | Height [mAU] | Area %  |
|--------|---------------|------|-------------|--------------|--------------|---------|
| 1      | 5.143         | MM   | 0.1428      | 322.60297    | 37.65620     | 49.3911 |
| 2      | 6.155         | MM   | 0.1457      | 330.55746    | 37.80771     | 50.6089 |

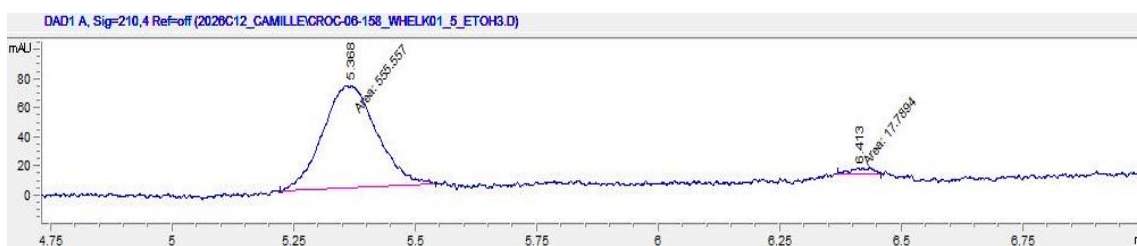

| Peak # | RetTime [min] | Type | Width [min] | Area [mAU*s] | Height [mAU] | Area %  |
|--------|---------------|------|-------------|--------------|--------------|---------|
| 1      | 5.368         | MM   | 0.1304      | 555.55688    | 71.00947     | 96.8973 |
| 2      | 6.413         | MM   | 0.0578      | 17.78943     | 4.77731      | 3.1027  |

4j

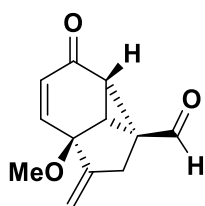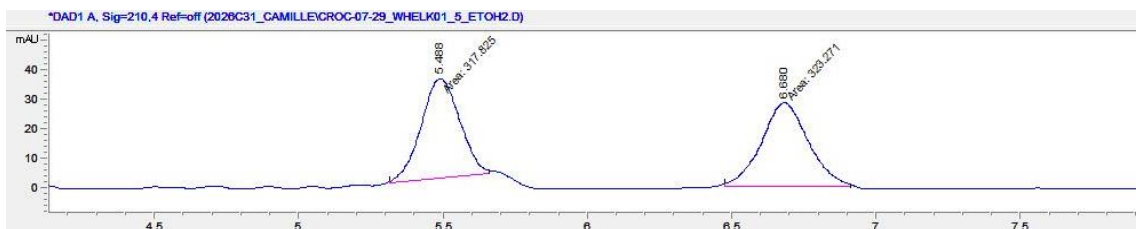

| Peak # | RetTime [min] | Type | Width [min] | Area [mAU*s] | Height [mAU] | Area %  |
|--------|---------------|------|-------------|--------------|--------------|---------|
| 1      | 5.488         | MM   | 0.1560      | 317.82529    | 33.95380     | 49.5753 |
| 2      | 6.680         | MM   | 0.1895      | 323.27106    | 28.43896     | 50.4247 |

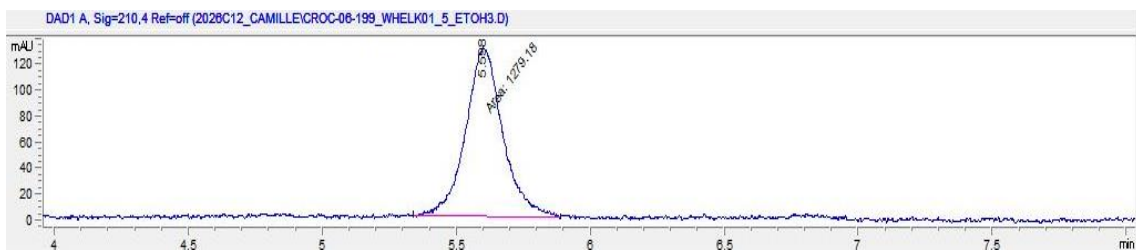

| Peak # | RetTime [min] | Type | Width [min] | Area [mAU*s] | Height [mAU] | Area %   |
|--------|---------------|------|-------------|--------------|--------------|----------|
| 1      | 5.598         | MM   | 0.1629      | 1279.17725   | 130.86551    | 100.0000 |

4k

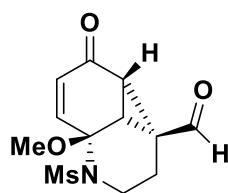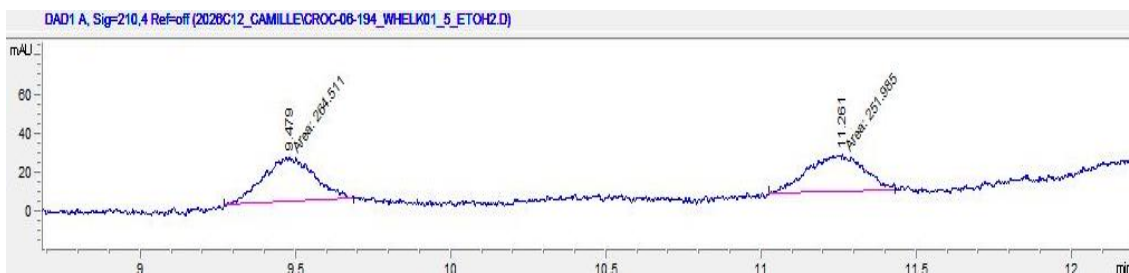

| Peak # | RetTime [min] | Type | Width [min] | Area [mAU*s] | Height [mAU] | Area %  |
|--------|---------------|------|-------------|--------------|--------------|---------|
| 1      | 9.479         | MM   | 0.1926      | 264.51114    | 22.88813     | 51.2126 |
| 2      | 11.261        | MM   | 0.2176      | 251.98503    | 19.30073     | 48.7874 |

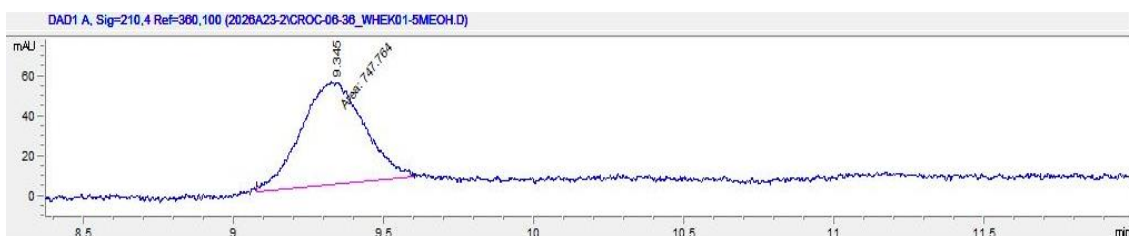

| Peak # | RetTime [min] | Type | Width [min] | Area [mAU*s] | Height [mAU] | Area %   |
|--------|---------------|------|-------------|--------------|--------------|----------|
| 1      | 9.345         | MM   | 0.2438      | 747.76410    | 51.10913     | 100.0000 |

4m

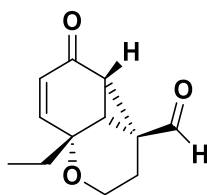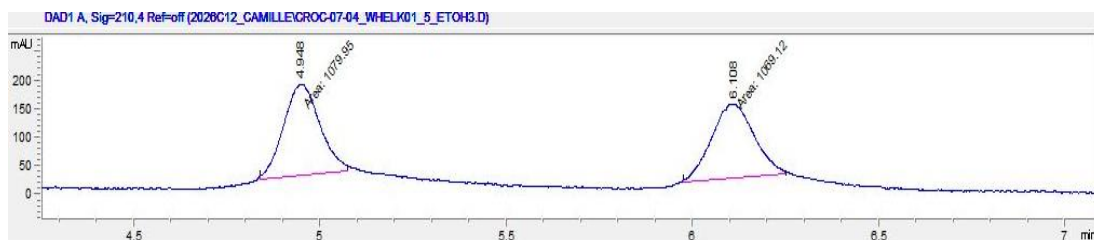

| Peak # | RetTime [min] | Type | Width [min] | Area [mAU*s] | Height [mAU] | Area %  |
|--------|---------------|------|-------------|--------------|--------------|---------|
| 1      | 4.948         | MM   | 0.1125      | 1079.95032   | 159.99591    | 50.2520 |
| 2      | 6.108         | MM   | 0.1344      | 1069.12109   | 132.54465    | 49.7480 |

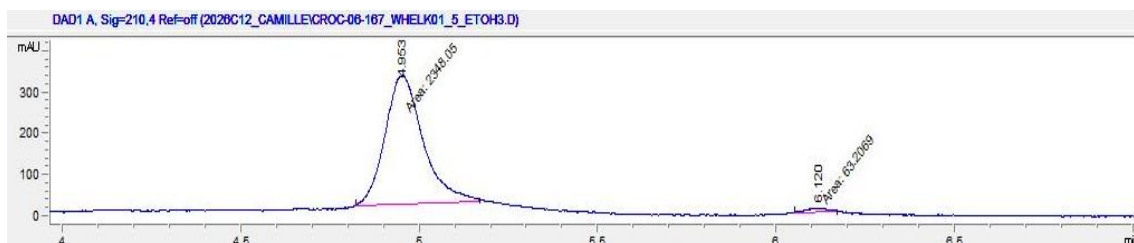

| Peak # | RetTime [min] | Type | Width [min] | Area [mAU*s] | Height [mAU] | Area %  |
|--------|---------------|------|-------------|--------------|--------------|---------|
| 1      | 4.953         | MM   | 0.1248      | 2348.05078   | 313.45291    | 97.3787 |
| 2      | 6.120         | MM   | 0.0824      | 63.20691     | 12.78045     | 2.6213  |

4n

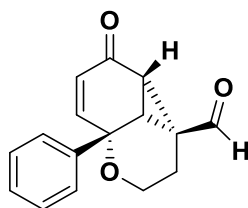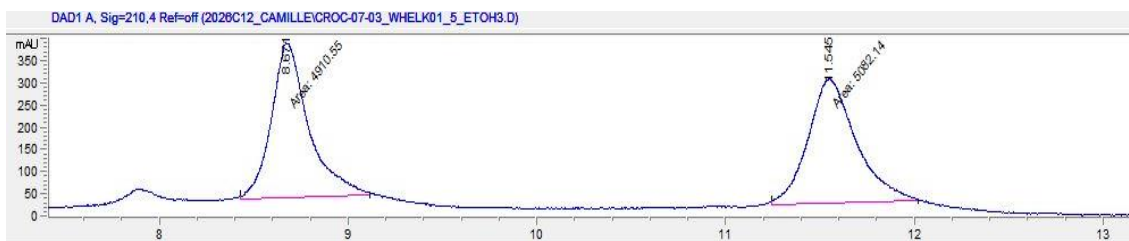

| Peak # | RetTime [min] | Type | Width [min] | Area [mAU*s] | Height [mAU] | Area %  |
|--------|---------------|------|-------------|--------------|--------------|---------|
| 1      | 8.671         | MM   | 0.2325      | 4910.55176   | 351.97272    | 49.0758 |
| 2      | 11.545        | MM   | 0.2976      | 5082.13525   | 284.64313    | 50.7906 |

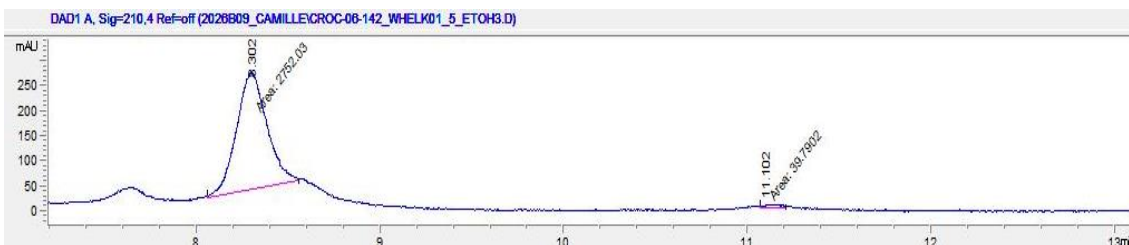

| Peak # | RetTime [min] | Type | Width [min] | Area [mAU*s] | Height [mAU] | Area %  |
|--------|---------------|------|-------------|--------------|--------------|---------|
| 1      | 8.302         | MM   | 0.1944      | 2752.02759   | 235.89568    | 98.5748 |
| 2      | 11.102        | MM   | 0.0935      | 39.79016     | 7.09435      | 1.4252  |

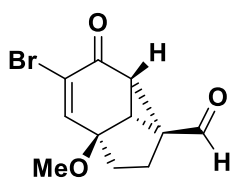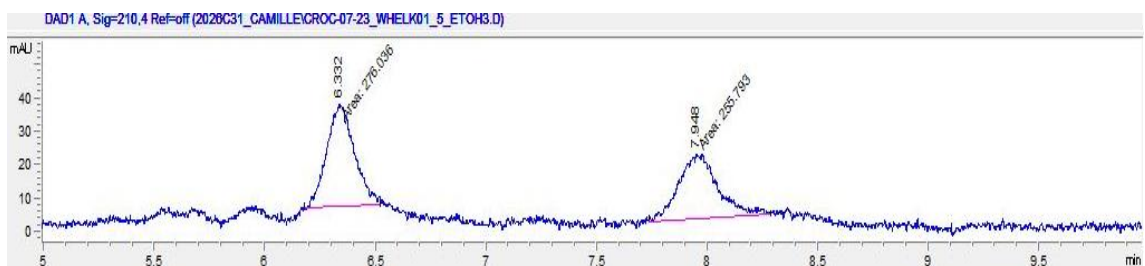

| Peak # | RetTime [min] | Type | Width [min] | Area [mAU*s] | Height [mAU] | Area %  |
|--------|---------------|------|-------------|--------------|--------------|---------|
| 1      | 6.332         | MM   | 0.1483      | 276.03586    | 31.02280     | 51.9031 |
| 2      | 7.948         | MM   | 0.2135      | 255.79294    | 19.97233     | 48.0969 |

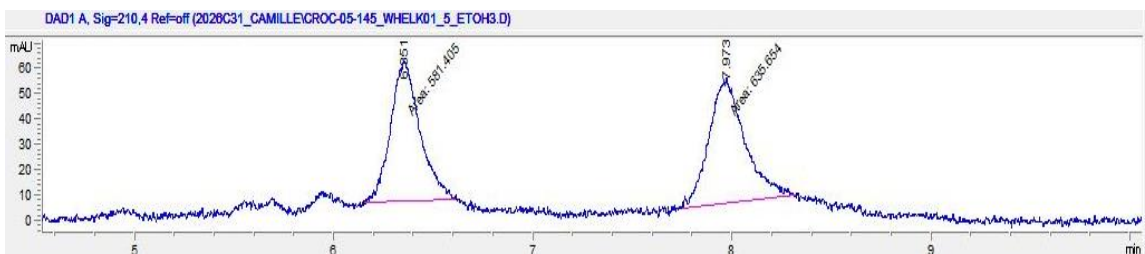

| Peak # | RetTime [min] | Type | Width [min] | Area [mAU*s] | Height [mAU] | Area %  |
|--------|---------------|------|-------------|--------------|--------------|---------|
| 1      | 6.351         | MM   | 0.1735      | 581.40460    | 55.86452     | 47.7713 |
| 2      | 7.973         | MM   | 0.2135      | 635.65350    | 49.62439     | 52.2287 |
